# Supplementary material for: Root microbiota alters response to root rot in Rhododendron delavayi Franch
Source: Front Microbiol. 2023 Aug 25;14:1236110. doi: 10.3389/fmicb.2023.1236110 (PMC10486992; doi:10.3389/fmicb.2023.1236110)
Supplement: Supplementary file 1 [file Table_1.XLSX]

## Sheet: Additional file 2
	Additional file 2:
	Table S1. The PCR primer information of the 16S rRNA gene V4 region and the ITS1 region
	Table S2. OTUs that are significantly differentially abundant between two adjacent niches. Hypothesis testing was carried out using a likelihood ratio test (p< 0.05).(log2FC:log2)
	Table S3. PERMANOVA analysis of weighted UniFrac distances between diseased and normal group. (BS: Bulk soil; RS: Rhizosphere; RP: Rhizoplane; ES: Endosphere.)
	Table S4. OTUs that are significantly differentially abundant between normal and diseased groups in the four niches. Hypothesis testing was carried out using a likelihood ratio test (p< 0.05). (A) Bulk soil; (B) Rhizosphere; (C) Rhizoplane; (D) Endosphere.
	Table S5. The document information of probiotics in the plant.
	Table S6. The document information of pathogenic fungi in the plant.

## Sheet: Table S1
	Table S1. The PCR primer information of the 16S rRNA gene V4 region and the ITS1 region
	the 16S rRNA gene V4 region	primer 515F: GTGCCAGCMGCCGCGGTAA
		primer 806R: GGACTACHVGGGTWTCTAAT
	the ITS1 region	primer ITS5-1737F: GGAAGTAAAAGTCGTAACAAGG
		primer ITS2-2043R: GCTGCGTTCTTCATCGATGC

## Sheet: Table S2
	Table S2. OTUs that are significantly differentially abundant between two adjacent niches. Hypothesis testing was carried out using a likelihood ratio test (p< 0.05).(log2FC:log2FlodChange)
	Bacteria
	OTUs_number	BS-RSlog2FC	BS-RSpadj	RS-RPlog2FC	RS-RPpadj	RP-ESlog2FC	RP-ESpadj	group
	OTU_72	-0.269	0.492	-0.297	0.198884	0.41993	0.0211656	depleted in NES
	OTU_47	-0.53	0.267	-0.145	0.657007	0.531068	4.27635e-05	depleted in NES
	OTU_5614	-0.193	0.811	0.371	0.441477	1.12717	0.0120148	depleted in NES
	OTU_220	-0.298	0.545	0.775	0.150081	1.28446	0.0331502	a
	OTU_761	0.848	0.368	-1.078	0.0834776	1.30108	0.0487311	depleted in NES
	OTU_2812	-0.941	0.149	-0.799	0.099069	1.37904	0.0487311	depleted in NES
	OTU_1074	-0.061	0.942	-1.003	0.0683199	1.75182	0.0111999	depleted in NES
	OTU_1045	-0.514	0.501	-0.229	0.713104	2.42824	0.0294748	depleted in NES
	OTU_1356	-0.86	0.65	-1.014	0.336432	2.50289	0.029789	depleted in NES
	OTU_370	0.522	0.532	0.276	0.704365	2.68632	0.000776233	depleted in NES
	OTU_967	-0.292	0.777	-0.593	0.28527	2.77124	0.00950814	depleted in NES
	OTU_1797	-3.322	0.091	-0.42	0.707618	3.23629	0.0380409	depleted in NES
	OTU_837	-0.134	0.912	0.252	0.787642	3.27883	0.029789	depleted in NES
	OTU_1202	-2.222	0.147	-0.228	0.824181	3.27883	0.029789	depleted in NES
	OTU_1420	1.146	0.181	-0.522	0.444632	3.36809	0.00563141	depleted in NES
	OTU_2072	-0.521	0.831	-0.504	0.706205	3.41368	0.0294748	depleted in NES
	OTU_1228	-0.614	0.652	0.016	0.943762	3.41368	0.0294748	depleted in NES
	OTU_697	-0.878	0.546	-0.883	0.346724	3.43546	0.0238149	depleted in NES
	OTU_894	-0.753	0.482	0.927	0.334786	3.50759	0.0242616	depleted in NES
	OTU_816	-0.878	0.272	0.663	0.432622	3.76682	0.0485275	depleted in NES
	OTU_2870	-0.077	0.952	-0.292	0.759154	4.03937	0.0228561	depleted in NES
	OTU_1481	0.495	0.712	0.126	0.888812	4.121	0.00608388	depleted in NES
	OTU_2442	-0.874	0.127	0.533	0.310452	4.40568	0.000264043	depleted in NES
	OTU_2284	-0.344	0.803	-0.54	0.633585	4.73834	0.0132465	depleted in NES
	OTU_593	1.628	0.195	5.349	0.00145757	-3.90017	0.0693119	depleted in NRP
	OTU_875	-0.631	0.652	3.768	0.0118	-3.36691	0.112756	depleted in NRP
	OTU_2009	-2.951	0.068	3.055	0.0433217	-3.00545	0.34001	depleted in NRP
	OTU_779	-0.766	0.267	4.205	2.69319e-05	-2.95906	0.117996	depleted in NRP
	OTU_1343	-0.656	0.543	3.535	0.00331029	-2.92441	0.1397	depleted in NRP
	OTU_1716	-1.424	0.173	4.158	0.00387458	-2.60179	0.132405	depleted in NRP
	OTU_872	-0.534	0.559	3.922	0.00285022	-2.51981	0.171605	depleted in NRP
	OTU_608	0.554	0.546	4.894	0.00010966	-2.50259	NA	depleted in NRP
	OTU_557	1.283	0.305	3.982	0.00447828	-2.34893	0.17579	depleted in NRP
	OTU_2267	-2.253	0.069	3.561	0.0053485	-2.32857	NA	depleted in NRP
	OTU_5335	-0.357	0.794	2.987	0.0257272	-2.29857	NA	depleted in NRP
	OTU_2088	-0.491	0.667	3.09	0.0321487	-2.24956	0.309491	depleted in NRP
	OTU_1181	0.844	0.227	4.147	8.52183e-05	-2.24836	0.283866	depleted in NRP
	OTU_4122	-0.328	0.78	3.123	0.0072208	-2.24836	0.283866	depleted in NRP
	OTU_2388	0.867	0.35	3.132	0.0114446	-2.14752	NA	depleted in NRP
	OTU_1388	0.22	0.87	2.983	0.0417584	-2.14752	NA	depleted in NRP
	OTU_1774	-1.184	0.369	3.002	0.0420473	-2.14752	NA	depleted in NRP
	OTU_1881	-1.95	0.119	3.555	0.013698	-2.01499	NA	depleted in NRP
	OTU_546	-0.065	0.955	3.398	0.000111832	-1.82383	0.109295	depleted in NRP
	OTU_105	0.762	0.129	3.403	7.16145e-05	-1.74118	0.21248	depleted in NRP
	OTU_775	-0.37	0.67	1.721	0.0469862	-1.69502	0.128333	depleted in NRP
	OTU_1373	-1.857	0.064	3.03	0.0133575	-1.56953	0.448084	depleted in NRP
	OTU_630	-0.512	0.753	3.441	0.00179228	-1.50934	0.212709	depleted in NRP
	OTU_864	-0.425	0.62	3.008	3.32262e-05	-1.4771	0.203774	depleted in NRP
	OTU_568	0.759	0.259	1.289	0.0405688	-1.44867	0.0607736	depleted in NRP
	OTU_2307	-0.097	0.943	2.806	0.0431092	-1.39066	0.499286	depleted in NRP
	OTU_724	-0.558	0.357	1.584	0.0102294	-1.29457	0.146798	depleted in NRP
	OTU_104	1.357	0.358	5.097	2.36441e-05	-1.23942	0.20513	depleted in NRP
	OTU_2083	-0.807	0.19	1.467	0.021682	-1.18402	0.171605	depleted in NRP
	OTU_336	-0.572	0.501	1.539	0.0124523	-1.17667	0.153402	depleted in NRP
	OTU_4858	0.619	0.553	1.532	0.0319588	-1.16707	0.129244	depleted in NRP
	OTU_441	0.36	0.855	3.48	0.00227907	-1.15404	0.344884	depleted in NRP
	OTU_3997	-0.757	0.081	2.607	7.43244e-09	-1.14077	0.0683504	depleted in NRP
	OTU_6225	-1.148	0.098	2.76	1.13293e-06	-1.1356	0.160632	depleted in NRP
	OTU_651	0.02	0.958	1.637	0.0450583	-1.1234	0.199745	depleted in NRP
	OTU_1223	0.886	0.25	3.284	0.00713618	-1.12201	NA	depleted in NRP
	OTU_4216	-1.212	0.342	3.482	0.02137	-1.12201	NA	depleted in NRP
	OTU_812	-1.711	0.307	4.26	0.03631	-1.12201	NA	depleted in NRP
	OTU_547	-0.746	0.392	1.727	0.0491019	-1.09739	0.42772	depleted in NRP
	OTU_4575	0.112	0.902	2.555	1.61871e-06	-1.09041	0.140225	depleted in NRP
	OTU_1954	-0.67	0.462	3.102	7.39916e-05	-1.04509	0.290048	depleted in NRP
	OTU_6237	-0.001	0.981	2.621	0.0349693	-1.03387	0.679874	depleted in NRP
	OTU_741	-0.107	0.912	2.039	0.00990911	-1.03136	0.448084	depleted in NRP
	OTU_422	-0.326	0.649	2.936	2.13352e-06	-1.03072	0.176662	depleted in NRP
	OTU_5773	-0.753	0.295	1.279	0.0328518	-1.00465	0.175468	depleted in NRP
	OTU_1368	-0.701	0.489	1.994	0.00242988	-0.993052	0.202477	depleted in NRP
	OTU_96	-0.315	0.687	0.933	0.0113904	-0.960491	0.072226	depleted in NRP
	OTU_945	0.17	0.882	2.414	0.00765703	-0.949805	0.450762	depleted in NRP
	OTU_5759	0.202	0.889	4.401	1.90139e-05	-0.938446	0.572612	depleted in NRP
	OTU_432	-0.58	0.461	1.693	0.0111526	-0.928253	0.250246	depleted in NRP
	OTU_54	0.742	0.349	4.814	5.18777e-15	-0.890784	0.175468	depleted in NRP
	OTU_1113	0.938	0.101	1.579	0.0179623	-0.872483	0.434277	depleted in NRP
	OTU_644	-0.688	0.328	2.568	2.20892e-05	-0.84272	0.34001	depleted in NRP
	OTU_551	0.347	0.707	1.444	0.00715096	-0.83027	0.12046	depleted in NRP
	OTU_5319	-0.208	0.66	1.649	0.000233439	-0.825193	0.185649	depleted in NRP
	OTU_2242	-0.197	0.712	1.929	5.89002e-05	-0.811082	0.367266	depleted in NRP
	OTU_2061	-0.602	0.323	0.989	0.0143527	-0.795062	0.15166	depleted in NRP
	OTU_5743	-0.874	0.135	1.32	0.0115162	-0.775145	0.305786	depleted in NRP
	OTU_881	-0.927	0.374	2.551	0.00495526	-0.758921	0.660305	depleted in NRP
	OTU_497	-0.464	0.571	1.691	0.0201659	-0.756691	0.453324	depleted in NRP
	OTU_449	-0.438	0.621	1.829	0.00339317	-0.725742	0.317186	depleted in NRP
	OTU_832	-0.11	0.911	1.932	0.0025283	-0.702398	0.411722	depleted in NRP
	OTU_4950	-0.241	0.756	1.738	1.60778e-06	-0.701424	0.0952367	depleted in NRP
	OTU_21	0.395	0.132	1.741	3.09228e-18	-0.673967	0.139866	depleted in NRP
	OTU_1394	-0.488	0.569	2.015	0.013698	-0.665129	0.611445	depleted in NRP
	OTU_2896	0.689	0.335	0.917	0.0262318	-0.659651	0.362523	depleted in NRP
	OTU_574	-1.051	0.058	1.484	0.00981247	-0.65341	0.353855	depleted in NRP
	OTU_145	-0.379	0.331	1.068	0.000940203	-0.648132	0.157562	depleted in NRP
	OTU_173	-0.05	0.931	0.967	0.000698975	-0.641795	0.174614	depleted in NRP
	OTU_4080	-0.551	0.527	3.985	0.000407764	-0.641119	NA	depleted in NRP
	OTU_972	0.275	0.78	4.15	0.000695442	-0.641119	NA	depleted in NRP
	OTU_654	-0.491	0.599	3.832	0.00114427	-0.641119	NA	depleted in NRP
	OTU_1149	-1.002	0.342	3.726	0.00421436	-0.641119	NA	depleted in NRP
	OTU_758	0.313	0.842	3.706	0.00672125	-0.641119	NA	depleted in NRP
	OTU_288	-0.027	0.97	2.492	2.32378e-06	-0.63899	0.334973	depleted in NRP
	OTU_4739	-0.381	0.474	0.864	0.0425299	-0.630617	0.243759	depleted in NRP
	OTU_1322	-0.472	0.365	1.139	0.0217148	-0.60623	0.481463	depleted in NRP
	OTU_324	-0.691	0.267	1.58	0.00301775	-0.606006	0.436917	depleted in NRP
	OTU_243	-0.498	0.44	1.135	0.029937	-0.600136	0.486571	depleted in NRP
	OTU_3805	0.602	0.415	1.546	0.00355259	-0.585209	0.376158	depleted in NRP
	OTU_367	-1.123	0.064	2	0.00133328	-0.574152	0.63593	depleted in NRP
	OTU_434	0.656	0.323	1.785	0.0148125	-0.568105	0.648254	depleted in NRP
	OTU_93	-0.426	0.465	1.476	0.000162166	-0.566439	0.171605	depleted in NRP
	OTU_803	-0.43	0.409	1.468	0.00514892	-0.544703	0.610814	depleted in NRP
	OTU_167	-0.297	0.633	1.01	0.00533186	-0.536367	0.13379	depleted in NRP
	OTU_555	-0.42	0.652	2.021	0.00301775	-0.529254	0.699136	depleted in NRP
	OTU_133	-0.248	0.455	1.796	1.03813e-16	-0.52859	0.125621	depleted in NRP
	OTU_101	-0.195	0.927	2.527	0.0174484	-0.501048	0.772044	depleted in NRP
	OTU_219	0.098	0.929	1.201	0.00823508	-0.497996	0.283529	depleted in NRP
	OTU_861	-1.074	0.05	0.89	0.0204224	-0.467338	0.278755	depleted in NRP
	OTU_365	1.609	0.258	1.835	0.0294371	-0.46583	0.723931	depleted in NRP
	OTU_92	0.018	0.976	1.636	0.00133242	-0.457075	0.25066	depleted in NRP
	OTU_413	0.011	0.969	1.291	0.0440222	-0.450549	0.572612	depleted in NRP
	OTU_587	-0.002	0.993	1.345	0.0228961	-0.439128	0.718801	depleted in NRP
	OTU_213	-0.273	0.712	2.395	2.13074e-07	-0.435112	0.283866	depleted in NRP
	OTU_3474	-0.306	0.407	0.588	0.0311038	-0.431863	0.297292	depleted in NRP
	OTU_552	-0.568	0.7	3.626	0.000183935	-0.427397	0.835475	depleted in NRP
	OTU_160	-0.698	0.52	1.78	0.00626458	-0.422738	0.361773	depleted in NRP
	OTU_139	0.182	0.668	1.33	4.31508e-07	-0.422442	0.250246	depleted in NRP
	OTU_948	-0.233	0.825	2.223	0.0187398	-0.409936	0.856521	depleted in NRP
	OTU_9	-0.775	0.198	1.066	0.00803111	-0.401548	0.270726	depleted in NRP
	OTU_205	-0.215	0.764	0.912	0.0347271	-0.389813	0.449783	depleted in NRP
	OTU_436	0.033	0.955	1.978	2.82023e-05	-0.37579	0.58429	depleted in NRP
	OTU_111	-0.208	0.682	1.881	4.48426e-09	-0.363372	0.172832	depleted in NRP
	OTU_294	0.113	0.912	3.692	1.19373e-09	-0.361363	0.772044	depleted in NRP
	OTU_1102	-0.421	0.584	1.845	1.35617e-05	-0.356829	0.171605	depleted in NRP
	OTU_2760	0.287	0.671	1.483	0.0011105	-0.347923	0.640574	depleted in NRP
	OTU_268	-0.039	0.953	1.582	0.00038777	-0.336846	0.576429	depleted in NRP
	OTU_180	0.715	0.601	2.16	0.000807247	-0.332632	0.448084	depleted in NRP
	OTU_968	-0.75	0.338	1.744	0.00624209	-0.327041	0.814669	depleted in NRP
	OTU_127	-0.113	0.892	0.855	0.0409749	-0.321958	0.258509	depleted in NRP
	OTU_368	-0.218	0.652	1.952	5.27377e-07	-0.29829	0.682553	depleted in NRP
	OTU_478	-1.204	0.075	1.774	0.00766582	-0.298003	0.817823	depleted in NRP
	OTU_1206	-0.262	0.741	1.511	0.026564	-0.293907	0.87785	depleted in NRP
	OTU_208	0.063	0.866	0.841	0.00165334	-0.290317	0.481833	depleted in NRP
	OTU_41	0.006	0.975	1.352	2.39041e-16	-0.278338	0.186906	depleted in NRP
	OTU_824	-0.45	0.755	1.95	0.0130362	-0.259136	0.831123	depleted in NRP
	OTU_36	-0.244	0.545	1.566	1.24518e-15	-0.257612	0.380551	depleted in NRP
	OTU_5021	0.686	0.347	1.565	0.00274302	-0.257288	0.720451	depleted in NRP
	OTU_95	-0.157	0.77	1.063	1.02428e-06	-0.250648	0.439232	depleted in NRP
	OTU_5092	0.165	0.841	1.23	0.0119475	-0.240092	0.660305	depleted in NRP
	OTU_340	-0.389	0.78	1.499	0.0231173	-0.229699	0.786675	depleted in NRP
	OTU_326	-0.273	0.713	1.031	0.00291652	-0.227884	0.555077	depleted in NRP
	OTU_14	0.211	0.842	1.925	0.000659565	-0.226729	0.669297	depleted in NRP
	OTU_242	-1.377	0.122	1.96	0.00166171	-0.212673	0.718801	depleted in NRP
	OTU_141	0.008	0.985	1.348	0.000194388	-0.206706	0.565587	depleted in NRP
	OTU_296	0.335	0.561	1.312	2.29826e-05	-0.205266	0.73344	depleted in NRP
	OTU_528	-1.41	0.136	1.668	0.0405698	-0.198759	0.863934	depleted in NRP
	OTU_4606	0.033	0.962	1.638	0.00243277	-0.19835	0.817823	depleted in NRP
	OTU_427	-0.19	0.852	1.915	0.0102912	-0.198281	0.873286	depleted in NRP
	OTU_327	-0.08	0.948	1.593	0.00147855	-0.192914	0.681299	depleted in NRP
	OTU_682	0.177	0.912	1.783	0.0450339	-0.183677	0.868954	depleted in NRP
	OTU_6018	0.232	0.552	0.626	0.0472155	-0.178173	0.753442	depleted in NRP
	OTU_1871	0.864	0.224	1.65	0.00629392	-0.177942	0.887317	depleted in NRP
	OTU_2901	0.2	0.907	1.61	0.0331513	-0.165846	0.793336	depleted in NRP
	OTU_1122	0.029	0.956	3.217	0.00464802	-0.160227	NA	depleted in NRP
	OTU_1218	0.036	0.964	2.798	0.020332	-0.160227	NA	depleted in NRP
	OTU_118	-0.133	0.78	0.826	0.00470853	-0.159949	0.58429	depleted in NRP
	OTU_210	-0.281	0.721	2.003	2.82858e-05	-0.145585	0.856521	depleted in NRP
	OTU_304	-0.787	0.24	1.148	0.0358823	-0.137057	0.848533	depleted in NRP
	OTU_592	-0.587	0.14	0.715	0.0424068	-0.13336	0.855046	depleted in NRP
	OTU_5333	-0.863	0.151	1.065	0.0341533	-0.130251	0.848533	depleted in NRP
	OTU_1747	-0.174	0.78	2.09	0.000124807	-0.129266	0.861808	depleted in NRP
	OTU_819	-0.844	0.267	2.191	0.00911878	-0.1219	0.918726	depleted in NRP
	OTU_178	1.053	0.208	1.76	0.0179426	-0.121467	0.896705	depleted in NRP
	OTU_153	-0.311	0.487	1.203	8.80604e-05	-0.112924	0.848533	depleted in NRP
	OTU_489	-0.04	0.935	1.818	5.54698e-23	-0.105906	0.688579	depleted in NRP
	OTU_648	-0.35	0.652	1.861	0.00470853	-0.0972862	0.93401	depleted in NRP
	OTU_545	0.04	0.943	1.075	0.000976952	-0.0938272	0.887317	depleted in NRP
	OTU_1243	-0.117	0.882	1.505	0.00282849	-0.0919617	0.894975	depleted in NRP
	OTU_197	-0.19	0.78	1.025	0.0219007	-0.0911013	0.889421	depleted in NRP
	OTU_85	-0.597	0.083	0.804	0.000260616	-0.0876595	0.712334	depleted in NRP
	OTU_840	-1.502	0.175	2.213	0.0114446	-0.0824392	0.912487	depleted in NRP
	OTU_269	0.349	0.646	1.295	0.00203402	-0.0745333	0.848533	depleted in NRP
	OTU_1048	-0.687	0.186	1.809	6.98734e-07	-0.072485	0.887317	depleted in NRP
	OTU_447	-0.084	0.912	1.507	1.41172e-08	-0.0707582	0.829628	depleted in NRP
	OTU_2695	-0.313	0.722	1.562	0.0445495	-0.0629479	0.925174	depleted in NRP
	OTU_262	-0.187	0.75	1.471	0.000439314	-0.0518073	0.915652	depleted in NRP
	OTU_121	-0.355	0.305	0.522	0.0226809	-0.0465832	0.881507	depleted in NRP
	OTU_5063	0.755	0.349	3.238	8.78721e-06	-0.0411516	0.95337	depleted in NRP
	OTU_429	-1.396	0.21	3.087	7.16145e-05	-0.0345105	0.89601	depleted in NRP
	OTU_31	0.178	0.413	0.787	5.74265e-05	-0.0341931	0.926023	depleted in NRP
	OTU_5473	-0.603	0.358	1.531	1.99301e-05	-0.0247403	0.937295	depleted in NRP
	OTU_61	-0.13	0.803	1.803	1.61109e-10	-0.015008	0.92975	depleted in NRP
	OTU_1251	0.26	0.803	1.677	0.00320394	-0.00918415	0.968861	depleted in NRP
	OTU_52	0.136	0.816	0.933	0.0119919	-0.00555378	0.964323	depleted in NRP
	OTU_248	-0.203	0.843	1.929	0.000237599	-0.0044855	0.943354	depleted in NRP
	OTU_106	-0.455	0.296	0.875	0.0100569	-0.000823584	0.976884	depleted in NRP
	OTU_563	-1.593	0.086	2.384	0.00429209	-7.52358e-05	0.964213	depleted in NRP
	OTU_113	-0.169	0.593	0.501	0.0273421	0.00223418	0.938098	depleted in NRP
	OTU_171	-0.456	0.665	1.853	0.0038505	0.00505695	0.922543	depleted in NRP
	OTU_512	-0.017	0.957	1.529	0.00027616	0.0123009	0.924625	depleted in NRP
	OTU_123	-0.127	0.744	0.8	0.000321826	0.0196278	0.949364	depleted in NRP
	OTU_81	-0.469	0.269	1.099	0.00127315	0.027131	0.922543	depleted in NRP
	OTU_16	-0.254	0.621	0.682	0.0112621	0.0296219	0.873286	depleted in NRP
	OTU_1025	-0.62	0.449	1.986	0.0462044	0.042503	0.900172	depleted in NRP
	OTU_382	0.099	0.897	0.931	0.0130255	0.0488074	0.915167	depleted in NRP
	OTU_265	0.203	0.831	1.502	0.00630734	0.0512326	0.90671	depleted in NRP
	OTU_108	-0.373	0.357	1.443	1.21258e-09	0.0541134	0.884173	depleted in NRP
	OTU_403	0.252	0.396	0.792	0.0069091	0.0573155	0.911759	depleted in NRP
	OTU_198	-0.264	0.414	0.714	0.00174925	0.0618926	0.864673	depleted in NRP
	OTU_64	-0.935	0.323	2.614	4.53178e-05	0.0630766	0.907823	depleted in NRP
	OTU_228	-0.238	0.66	1.072	0.00030833	0.0671079	0.83911	depleted in NRP
	OTU_29	-0.215	0.382	1.295	6.58752e-19	0.0691554	0.782382	depleted in NRP
	OTU_37	-0.282	0.582	1.217	9.94864e-05	0.0707532	0.77805	depleted in NRP
	OTU_1445	-0.383	0.219	1.056	6.61311e-05	0.0786223	0.879762	depleted in NRP
	OTU_643	-0.63	0.178	0.932	0.0141581	0.0928976	0.856521	depleted in NRP
	OTU_301	-0.01	0.956	1.418	0.00166222	0.0933946	0.901901	depleted in NRP
	OTU_39	-0.456	0.052	1.151	1.94268e-06	0.095131	0.800916	depleted in NRP
	OTU_246	0.279	0.747	0.999	0.024765	0.105923	0.820915	depleted in NRP
	OTU_22	-0.536	0.312	0.939	0.00948295	0.111085	0.677232	depleted in NRP
	OTU_719	-0.903	0.111	1.384	0.0171943	0.121657	0.891524	depleted in NRP
	OTU_206	-0.395	0.135	0.464	0.0459348	0.13312	0.722772	depleted in NRP
	OTU_505	-0.214	0.664	1.615	6.60379e-06	0.135195	0.848835	depleted in NRP
	OTU_325	-1.29	0.111	1.969	0.000720985	0.148417	0.879699	depleted in NRP
	OTU_653	-0.207	0.842	2.285	0.00865097	0.158057	0.901901	depleted in NRP
	OTU_158	-0.491	0.171	0.624	0.0209344	0.164192	0.614874	depleted in NRP
	OTU_4926	-0.47	0.408	0.97	0.021682	0.188732	0.745773	depleted in NRP
	OTU_691	-0.399	0.25	1.254	0.00013962	0.198738	0.786715	depleted in NRP
	OTU_2283	-0.068	0.938	1.321	0.0390512	0.203157	0.888913	depleted in NRP
	OTU_100	-0.534	0.492	1.938	5.39237e-05	0.209609	0.715706	depleted in NRP
	OTU_907	-0.588	0.366	2.187	0.000715917	0.23076	0.889967	depleted in NRP
	OTU_455	-0.303	0.546	1.582	1.68547e-06	0.231001	0.782382	depleted in NRP
	OTU_582	0.079	0.824	1.274	5.3531e-11	0.233208	0.284437	depleted in NRP
	OTU_135	-0.248	0.598	0.882	0.00442489	0.245547	0.560854	depleted in NRP
	OTU_544	-0.657	0.379	1.528	0.00858828	0.250002	0.763904	depleted in NRP
	OTU_480	-0.004	0.972	1.92	0.000660158	0.251296	0.807202	depleted in NRP
	OTU_28	-0.482	0.06	0.721	0.0137952	0.253754	0.636567	depleted in NRP
	OTU_383	-0.298	0.638	0.98	0.0464124	0.256614	0.765941	depleted in NRP
	OTU_15	0.439	0.564	1.013	0.0252913	0.258857	0.476409	depleted in NRP
	OTU_1133	-1.222	0.063	1.641	0.0116406	0.265167	0.893867	depleted in NRP
	OTU_655	-0.423	0.397	1.29	0.00654522	0.295987	0.745773	depleted in NRP
	OTU_5308	0.312	0.499	0.92	0.000282521	0.300258	0.323016	depleted in NRP
	OTU_51	-0.268	0.26	1.32	8.02328e-25	0.303796	0.122733	depleted in NRP
	OTU_359	-0.173	0.817	1.139	0.0116027	0.31285	0.564124	depleted in NRP
	OTU_1850	-0.779	0.42	3.057	0.0166035	0.320662	NA	depleted in NRP
	OTU_397	-1.09	0.341	1.819	0.0335016	0.321268	0.793336	depleted in NRP
	OTU_211	-0.62	0.05	0.899	0.00469464	0.322171	0.560814	depleted in NRP
	OTU_619	-0.726	0.103	1.337	2.65065e-05	0.326026	0.427721	depleted in NRP
	OTU_6086	-0.089	0.843	0.804	0.00549883	0.326815	0.519791	depleted in NRP
	OTU_372	-0.67	0.346	1.172	0.0191079	0.329985	0.600212	depleted in NRP
	OTU_1967	0.156	0.837	2.068	4.76659e-06	0.35279	0.596811	depleted in NRP
	OTU_217	-0.313	0.843	1.734	0.0306729	0.36221	0.772044	depleted in NRP
	OTU_151	0.848	0.233	1.179	0.0057956	0.390833	0.271098	depleted in NRP
	OTU_67	-0.447	0.675	2.028	0.000855584	0.395129	0.203774	depleted in NRP
	OTU_445	-0.638	0.374	1.52	0.0159594	0.396559	0.702186	depleted in NRP
	OTU_660	0.342	0.702	1.181	0.030453	0.470948	0.605529	depleted in NRP
	OTU_122	0.887	0.58	1.947	0.0189155	0.479934	0.447901	depleted in NRP
	OTU_194	-0.436	0.609	1.118	0.0341533	0.481493	0.235815	depleted in NRP
	OTU_126	0.279	0.506	1.751	1.23094e-10	0.492586	0.250246	depleted in NRP
	OTU_3379	-0.107	0.88	1.136	0.00301775	0.495805	0.309711	depleted in NRP
	OTU_5563	-0.526	0.236	1.094	0.00134465	0.508271	0.171605	depleted in NRP
	OTU_373	-0.244	0.716	1.444	0.00181988	0.525778	0.361773	depleted in NRP
	OTU_665	0.006	0.957	2.236	0.00694954	0.540814	0.815838	depleted in NRP
	OTU_753	0.033	0.957	1.562	0.036919	0.611157	0.663231	depleted in NRP
	OTU_10	0.093	0.9	0.83	0.0476464	0.616276	0.19409	depleted in NRP
	OTU_407	-1.235	0.168	1.401	0.0369887	0.660071	0.41856	depleted in NRP
	OTU_1572	0.618	0.397	1.164	0.0248414	0.731875	0.283529	depleted in NRP
	OTU_300	-0.575	0.312	1.389	0.00318108	0.737973	0.394396	depleted in NRP
	OTU_4265	-1.303	0.268	2.752	0.0301593	0.801558	NA	depleted in NRP
	OTU_1663	-2.583	0.088	3.149	0.0498266	0.801558	NA	depleted in NRP
	OTU_419	-0.897	0.274	1.559	0.0125046	0.866497	0.11473	depleted in NRP
	OTU_1474	-1.04	0.409	5.233	4.21782e-05	0.899397	0.745773	depleted in NRP
	OTU_333	-0.266	0.774	2.067	0.000848673	0.922393	0.353354	depleted in NRP
	OTU_461	-0.498	0.438	1.083	0.0497655	0.931032	0.342856	depleted in NRP
	OTU_874	-0.205	0.785	1.58	0.00356653	0.933283	0.448248	depleted in NRP
	OTU_971	-0.871	0.256	1.654	0.0273542	0.940598	0.491336	depleted in NRP
	OTU_537	-0.559	0.505	1.948	0.00152301	1.05221	0.326715	depleted in NRP
	OTU_944	-0.67	0.401	1.469	0.0105909	1.21477	0.063283	depleted in NRP
	OTU_822	-0.187	0.841	2.127	0.00579221	1.23224	0.564124	depleted in NRP
	OTU_1766	-0.244	0.61	1.49	5.35665e-05	1.27305	0.105038	depleted in NRP
	OTU_469	-0.447	0.323	1.207	0.000753121	1.3644	0.0819432	depleted in NRP
	OTU_933	0.873	0.155	2.31	0.0201577	1.43843	NA	depleted in NRP
	OTU_533	0.654	0.161	1.776	0.00680054	3.02553	0.146798	depleted in NRP
	OTU_541	0.646	0.361	1.514	0.0440938	3.19092	0.0521398	depleted in NRP
	OTU_914	-1.164	0.052	4.924	1.71594e-07	NA	NA	depleted in NRP
	OTU_1456	-1.791	0.161	4.422	0.00310636	NA	NA	depleted in NRP
	OTU_573	1.226	0.493	4.703	0.00922021	NA	NA	depleted in NRP
	OTU_1546	-0.602	0.606	3.732	0.0104044	NA	NA	depleted in NRP
	OTU_1491	-0.931	0.442	3.859	0.0119919	NA	NA	depleted in NRP
	OTU_1421	-0.843	0.46	3.614	0.0121597	NA	NA	depleted in NRP
	OTU_1969	0.475	0.65	3.082	0.019663	NA	NA	depleted in NRP
	OTU_1164	-0.317	0.833	3.115	0.025466	NA	NA	depleted in NRP
	OTU_1057	0.896	0.372	3.207	0.0273826	NA	NA	depleted in NRP
	OTU_2832	-1.134	0.413	2.721	0.0386612	NA	NA	depleted in NRP
	OTU_1713	-1.608	0.267	3.237	0.0409514	NA	NA	depleted in NRP
	OTU_2077	-2.016	0.218	3.107	0.0445495	NA	NA	depleted in NRP
	OTU_2802	0.557	0.642	2.707	0.0455692	NA	NA	depleted in NRP
	OTU_6	-0.596	0.767	3.513	0.00379371	-4.68219	0.00115179	depleted in NRP,enriched in NES
	OTU_672	-0.437	0.519	4.229	2.30366e-05	-4.26944	0.00244247	depleted in NRP,enriched in NES
	OTU_949	0.402	0.707	3.85	0.00502861	-3.76253	0.0190864	depleted in NRP,enriched in NES
	OTU_1600	-0.685	0.307	4.318	5.89397e-06	-3.65506	0.0120148	depleted in NRP,enriched in NES
	OTU_1701	0.853	0.298	3.23	0.00761207	-3.27708	0.0337251	depleted in NRP,enriched in NES
	OTU_1454	-0.893	0.393	2.628	0.0386082	-3.22053	0.0287753	depleted in NRP,enriched in NES
	OTU_1182	-1.089	0.267	2.691	0.0181176	-2.95723	0.0331502	depleted in NRP,enriched in NES
	OTU_5049	-0.605	0.409	2.439	1.51733e-07	-1.31323	0.000189058	depleted in NRP,enriched in NES
	OTU_143	-0.429	0.512	1.488	1.24281e-05	-1.03542	0.0120148	depleted in NRP,enriched in NES
	OTU_138	0.002	0.991	1.292	0.00288328	-1.00233	0.0352007	depleted in NRP,enriched in NES
	OTU_394	0.287	0.482	1.115	0.000270103	-0.950693	0.0107524	depleted in NRP,enriched in NES
	OTU_355	-0.765	0.056	0.701	0.0341533	-0.865469	0.00244247	depleted in NRP,enriched in NES
	OTU_50	-0.428	0.414	1.838	1.69697e-08	-0.719821	0.000172649	depleted in NRP,enriched in NES
	OTU_8	-0.571	0.352	1.585	1.70949e-05	-0.568714	0.00131756	depleted in NRP,enriched in NES
	OTU_1140	4.336	0.013	NA	NA	-3.20744	0.172832	depleted in NRS
	OTU_2781	3.11	0.039	0.151	1	-2.99928	0.112756	depleted in NRS
	OTU_1477	3.64	0.033	0.151	1	-2.89266	0.128333	depleted in NRS
	OTU_1719	4.243	0.04	NA	NA	-2.7135	0.205259	depleted in NRS
	OTU_1170	4.833	0.046	-1.291	0.713104	-2.39896	0.203774	depleted in NRS
	OTU_988	3.667	0.046	0.151	1	-2.3643	NA	depleted in NRS
	OTU_1486	4.12	0.025	-1.291	1	-2.11901	0.230199	depleted in NRS
	OTU_710	3.555	0.022	1.506	0.53422	-2.01499	NA	depleted in NRS
	OTU_1775	4.908	0.001	-0.33	1	-2.01499	NA	depleted in NRS
	OTU_1629	5	0.017	NA	NA	-2.01499	NA	depleted in NRS
	OTU_1873	5.691	0.001	-1.291	0.713104	-2.01226	0.520416	depleted in NRS
	OTU_1082	2.287	0.026	-0.548	0.720661	-1.99544	0.0932917	depleted in NRS
	OTU_1403	3.736	0.045	-0.81	0.859402	-1.87579	0.364186	depleted in NRS
	OTU_991	1.673	0.025	1.762	0.182545	-1.81582	0.325007	depleted in NRS
	OTU_204	5.324	NA	0.86	0.591775	-1.66201	0.397503	depleted in NRS
	OTU_1749	3.662	0.032	0.643	0.774879	-1.64129	0.58429	depleted in NRS
	OTU_2968	3.86	0.003	-0.33	1	-1.53375	NA	depleted in NRS
	OTU_2620	3.516	0.007	-1.703	0.259232	-1.34605	0.489911	depleted in NRS
	OTU_1478	3.96	0.017	NA	NA	-1.12201	NA	depleted in NRS
	OTU_2322	4.36	0.036	NA	NA	-1.12201	NA	depleted in NRS
	OTU_5832	5.07	0.016	NA	NA	-1.12201	NA	depleted in NRS
	OTU_3159	1.902	0.018	0.758	0.594862	-1.03387	0.679874	depleted in NRS
	OTU_423	4.742	0	-1.003	0.432416	-0.834091	0.551954	depleted in NRS
	OTU_1379	2.472	0.05	-0.942	0.629773	-0.702667	0.753731	depleted in NRS
	OTU_776	3.595	0.027	1.14	0.638237	-0.641119	NA	depleted in NRS
	OTU_3455	3.449	0.041	-0.33	1	-0.641119	NA	depleted in NRS
	OTU_1402	5.296	0.013	NA	NA	-0.641119	NA	depleted in NRS
	OTU_431	0.879	0.035	-0.456	0.160854	-0.619548	0.117996	depleted in NRS
	OTU_754	1.67	0.016	1.062	0.346158	-0.597182	0.772044	depleted in NRS
	OTU_516	1.093	0.011	1.038	0.0773639	-0.562931	0.57679	depleted in NRS
	OTU_615	1.167	0.023	0.583	0.298371	-0.5423	0.51573	depleted in NRS
	OTU_529	1.99	0.027	0.119	0.882508	-0.472004	0.835217	depleted in NRS
	OTU_502	2.14	0.022	0.982	0.119413	-0.350159	0.745773	depleted in NRS
	OTU_538	1.241	0.022	0.108	0.859402	-0.290978	0.745773	depleted in NRS
	OTU_601	1.237	0.011	0.283	0.612376	-0.212648	0.819197	depleted in NRS
	OTU_578	3.916	0.005	-1.109	0.397288	-0.199311	0.89023	depleted in NRS
	OTU_892	1.549	0.049	0.134	0.915409	-0.198404	0.897831	depleted in NRS
	OTU_695	2.76	0.04	0.245	0.859944	-0.193199	0.896705	depleted in NRS
	OTU_116	2.202	0.005	0.112	0.86984	-0.190411	0.882281	depleted in NRS
	OTU_739	3.231	0.003	-1.619	0.179597	-0.18153	0.887317	depleted in NRS
	OTU_1709	4.487	0.005	-1.291	0.713104	-0.160227	NA	depleted in NRS
	OTU_2042	5.204	0.013	-1.291	0.713104	-0.160227	NA	depleted in NRS
	OTU_5221	1.503	0.011	0.286	0.562049	-0.103709	0.887317	depleted in NRS
	OTU_1216	2.469	0.012	-0.907	0.520609	-0.0772285	0.934072	depleted in NRS
	OTU_6119	3.655	0.034	-3.354	0.0800341	-0.00152521	0.943354	depleted in NRS
	OTU_4782	3.07	0.0001	-1.652	0.192166	0.0856235	0.909096	depleted in NRS
	OTU_5355	1.582	0.009	0.497	0.532092	0.0985751	0.897831	depleted in NRS
	OTU_1143	3.063	0.003	-0.777	0.502314	0.137411	0.915652	depleted in NRS
	OTU_1438	2.61	0.024	-0.907	0.520609	0.138263	0.898257	depleted in NRS
	OTU_338	0.79	0.04	0.619	0.190392	0.191317	0.809063	depleted in NRS
	OTU_66	0.896	0.002	0.148	0.699405	0.310767	0.64509	depleted in NRS
	OTU_1252	4.721	0.05	-1.772	0.623075	0.320662	NA	depleted in NRS
	OTU_941	4.995	0.042	-1.291	0.713104	0.320666	NA	depleted in NRS
	OTU_499	1.03	0.045	0.285	0.624423	0.352711	0.692428	depleted in NRS
	OTU_2551	2.394	0.009	-1.843	0.0889711	0.402448	0.814669	depleted in NRS
	OTU_1098	2.89	0.013	-1.205	0.234056	0.447732	0.733647	depleted in NRS
	OTU_1124	1.174	0.022	-0.604	0.19787	0.486239	0.481833	depleted in NRS
	OTU_277	1.434	0.003	-0.295	0.46234	0.497307	0.365398	depleted in NRS
	OTU_2060	2.385	0.001	-0.742	0.250309	0.582485	0.594655	depleted in NRS
	OTU_1543	3.621	0.017	-3.8	0.125393	0.628034	0.846435	depleted in NRS
	OTU_755	5.596	0.001	-1.772	0.623075	0.801558	NA	depleted in NRS
	OTU_869	6.268	0	-2.792	0.179629	0.867346	0.773477	depleted in NRS
	OTU_493	2.993	0.005	1.22	0.187369	0.876914	0.693148	depleted in NRS
	OTU_845	1.653	0	0.224	0.698812	0.992644	0.228536	depleted in NRS
	OTU_2702	4.332	0.006	-0.524	0.660766	1.00592	0.610814	depleted in NRS
	OTU_1703	1.666	0.019	-0.748	0.245737	1.034	0.220914	depleted in NRS
	OTU_130	5.07	1e-05	-0.907	0.551385	1.15787	0.631962	depleted in NRS
	OTU_209	1.842	0.036	-0.57	0.330096	1.20086	0.152371	depleted in NRS
	OTU_5814	3.952	0.028	-2.176	0.199897	1.29926	0.581996	depleted in NRS
	OTU_1442	1.415	0.002	-0.815	0.148682	1.3239	0.147796	depleted in NRS
	OTU_4026	4.435	0.006	-2.896	0.237937	1.44475	NA	depleted in NRS
	OTU_3259	4.217	0.024	-2.913	0.0889711	1.94321	NA	depleted in NRS
	OTU_1392	4.591	0.005	-2.915	0.237937	1.99093	NA	depleted in NRS
	OTU_1257	3.135	0.019	-0.942	0.629773	1.99093	NA	depleted in NRS
	OTU_2329	3.789	0.007	-3.067	0.0621683	2.09554	0.284437	depleted in NRS
	OTU_2373	4.699	1e-05	-2.671	0.154049	2.16267	NA	depleted in NRS
	OTU_1157	2.687	0.049	-1.371	0.381068	2.30154	NA	depleted in NRS
	OTU_612	3.659	0.045	-0.372	0.793506	2.35265	0.235815	depleted in NRS
	OTU_1022	4.335	0.024	-2.885	0.120483	2.3717	NA	depleted in NRS
	OTU_1241	1.928	0.035	-1.441	0.192166	2.58187	0.112756	depleted in NRS
	OTU_1451	2.177	0.046	-0.937	0.410632	2.77384	0.109295	depleted in NRS
	OTU_321	4.671	0	-1.75	0.114671	2.7947	0.113123	depleted in NRS
	OTU_919	5.791	0.0001	NA	NA	NA	NA	depleted in NRS
	OTU_1704	2.777	0.013	1.76	0.346724	NA	NA	depleted in NRS
	OTU_939	4.126	0.002	1.326	0.410226	NA	NA	depleted in NRS
	OTU_1852	3.243	0.013	1.14	0.638237	NA	NA	depleted in NRS
	OTU_1622	3.808	0.016	-0.33	1	NA	NA	depleted in NRS
	OTU_1636	3.786	0.018	-0.33	1	NA	NA	depleted in NRS
	OTU_2036	4.542	0.031	-0.33	1	NA	NA	depleted in NRS
	OTU_2624	3.963	0.009	-0.33	1	NA	NA	depleted in NRS
	OTU_530	3.835	0.005	-0.33	1	NA	NA	depleted in NRS
	OTU_884	5.289	0.003	-0.33	1	NA	NA	depleted in NRS
	OTU_1066	6.421	0.005	NA	NA	NA	NA	depleted in NRS
	OTU_1115	4.968	0.003	NA	NA	NA	NA	depleted in NRS
	OTU_1319	4.634	0.007	NA	NA	NA	NA	depleted in NRS
	OTU_1340	4.995	0.042	NA	NA	NA	NA	depleted in NRS
	OTU_1529	5.411	0.011	NA	NA	NA	NA	depleted in NRS
	OTU_1534	4.833	0.046	NA	NA	NA	NA	depleted in NRS
	OTU_1556	4.179	0.012	NA	NA	NA	NA	depleted in NRS
	OTU_2070	3.854	0.028	NA	NA	NA	NA	depleted in NRS
	OTU_2240	4.574	0.027	NA	NA	NA	NA	depleted in NRS
	OTU_2315	4.36	0.036	NA	NA	NA	NA	depleted in NRS
	OTU_2354	4.895	0.045	NA	NA	NA	NA	depleted in NRS
	OTU_2503	4.883	0.02	NA	NA	NA	NA	depleted in NRS
	OTU_2627	4.36	0.036	NA	NA	NA	NA	depleted in NRS
	OTU_2977	4.268	0.009	NA	NA	NA	NA	depleted in NRS
	OTU_3004	4.243	0.04	NA	NA	NA	NA	depleted in NRS
	OTU_3029	4.217	0.024	NA	NA	NA	NA	depleted in NRS
	OTU_3631	4.803	0.022	NA	NA	NA	NA	depleted in NRS
	OTU_4021	4.147	0.006	NA	NA	NA	NA	depleted in NRS
	OTU_4558	6.065	0.006	NA	NA	NA	NA	depleted in NRS
	OTU_507	5.818	0.007	NA	NA	NA	NA	depleted in NRS
	OTU_629	5.388	0.001	NA	NA	NA	NA	depleted in NRS
	OTU_646	1.536	0.005	-0.399	0.478207	2.45192	0.00440846	depleted in NRS,depleted in NES
	OTU_5254	2.827	0.011	2.463	0.0234336	-1.44976	0.454965	depleted in NRS,depleted in NRP
	OTU_344	0.724	0.05	1.418	0.000226801	-0.358904	0.597389	depleted in NRS,depleted in NRP
	OTU_1176	1.153	0.025	2.421	0.00192952	-0.225397	0.895246	depleted in NRS,depleted in NRP
	OTU_424	1.242	0.001	1.506	0.00166246	0.126868	0.864673	depleted in NRS,depleted in NRP
	OTU_114	1.239	0.049	1.11	0.0049824	0.371558	0.34001	depleted in NRS,depleted in NRP
	OTU_264	1.44	0.045	1.174	0.0128569	0.778478	0.21209	depleted in NRS,depleted in NRP
	OTU_2247	3.541	0.04	3.238	0.0137328	NA	NA	depleted in NRS,depleted in NRP
	OTU_885	3.557	0.034	NA	NA	-3.59132	0.0187934	depleted in NRS,enriched in NES
	OTU_844	1.693	0.028	0.385	0.673899	-1.69053	0.029789	depleted in NRS,enriched in NES
	OTU_384	4.149	0	-3.137	0.036919	-0.867241	0.690523	depleted in NRS,enriched in NRP
	OTU_986	4.149	0.015	-4.569	0.000169002	-0.723168	0.3705	depleted in NRS,enriched in NRP
	OTU_2501	4.984	0.014	-3.583	0.0191308	-0.710004	0.560814	depleted in NRS,enriched in NRP
	OTU_437	3.781	0.001	-5.172	3.00558e-10	-0.0900378	0.934072	depleted in NRS,enriched in NRP
	OTU_377	6.345	0.001	-3.358	0.0480462	-0.0681452	0.934072	depleted in NRS,enriched in NRP
	OTU_2253	2.592	0.034	-3.301	0.000446177	-0.0527696	0.936008	depleted in NRS,enriched in NRP
	OTU_237	1.786	0.007	-2.428	0.00217499	0.0850236	0.926754	depleted in NRS,enriched in NRP
	OTU_771	2.403	0.047	-2.89	0.0150213	0.322853	0.800916	depleted in NRS,enriched in NRP
	OTU_311	2.115	0.002	-3.053	3.05399e-09	0.47886	0.666749	depleted in NRS,enriched in NRP
	OTU_42	3.741	0.003	-4.266	3.02888e-07	0.536312	0.537748	depleted in NRS,enriched in NRP
	OTU_174	2.352	0.027	-1.448	0.0422961	0.613192	0.43658	depleted in NRS,enriched in NRP
	OTU_745	3.522	0.022	-5.448	0.00062002	0.837242	0.543797	depleted in NRS,enriched in NRP
	OTU_1068	2.765	0.004	-4.415	3.56654e-10	1.21348	0.12214	depleted in NRS,enriched in NRP
	OTU_1079	4.721	0.05	-4.762	5.18868e-05	1.32561	0.248378	depleted in NRS,enriched in NRP
	OTU_743	1.594	0.011	-2.731	9.88987e-06	1.47426	0.0833592	depleted in NRS,enriched in NRP
	OTU_2538	1.719	0.036	-8.591	1.09154e-09	1.49478	0.394139	depleted in NRS,enriched in NRP
	OTU_348	1.637	0.003	-4.328	5.01566e-07	1.70007	0.166546	depleted in NRS,enriched in NRP
	OTU_860	2.446	0.024	-5.278	1.15205e-07	1.83015	0.117996	depleted in NRS,enriched in NRP
	OTU_979	2.701	0.012	-2.928	0.0195847	2.0992	0.112361	depleted in NRS,enriched in NRP
	OTU_938	3.17	0.036	-3.124	0.000658844	2.44979	0.0512613	depleted in NRS,enriched in NRP
	OTU_2427	4.77	0.003	-3.967	0.0156019	2.51012	0.191517	depleted in NRS,enriched in NRP
	OTU_1593	6.462	0.005	-4.007	0.0245586	3.02553	0.146798	depleted in NRS,enriched in NRP
	OTU_1460	2.234	0.04	-2.857	0.0116502	3.06318	0.0932917	depleted in NRS,enriched in NRP
	OTU_6124	4.318	0.034	-3.69	0.00761662	3.19092	0.0521398	depleted in NRS,enriched in NRP
	OTU_2236	3.55	0.023	-4.585	0.029937	3.67948	0.166546	depleted in NRS,enriched in NRP
	OTU_637	2.696	0.003	-4.808	8.51859e-11	1.80141	0.00745546	depleted in NRS,enriched in NRP,depleted in NES
	OTU_1062	1.252	0.046	-2.878	6.07246e-10	1.8506	0.000629033	depleted in NRS,enriched in NRP,depleted in NES
	OTU_898	1.695	0.038	-3.385	4.00898e-05	2.14902	0.0294748	depleted in NRS,enriched in NRP,depleted in NES
	OTU_385	1.002	0.034	-5.377	3.98807e-18	2.27506	0.00306566	depleted in NRS,enriched in NRP,depleted in NES
	OTU_784	4.054	0.008	-6.898	7.2756e-12	2.40071	0.00201123	depleted in NRS,enriched in NRP,depleted in NES
	OTU_1434	3.998	0.012	-5.974	2.01245e-06	2.6097	0.0177722	depleted in NRS,enriched in NRP,depleted in NES
	OTU_1205	3.874	0.007	-3.839	0.00328192	3.34422	0.0297945	depleted in NRS,enriched in NRP,depleted in NES
	OTU_6012	4.456	0.02	-4.462	0.000318176	3.48647	0.0184792	depleted in NRS,enriched in NRP,depleted in NES
	OTU_1283	3.374	0.037	-6.056	5.56515e-05	5.06844	0.00745546	depleted in NRS,enriched in NRP,depleted in NES
	OTU_1499	-1.984	0.494	1.14	0.638237	-7.30219	0.00946809	enriched in NES
	OTU_509	2.485	0.227	-3.354	0.0800341	-5.69454	0.00608388	enriched in NES
	OTU_2103	NA	NA	NA	NA	-5.40538	0.0228543	enriched in NES
	OTU_1018	-1.417	0.397	2.841	0.0523659	-5.30771	0.000630648	enriched in NES
	OTU_1418	2.007	0.493	NA		-4.8198	0.00745546	enriched in NES
	OTU_1288	NA	NA	-1.291	1	-4.63372	0.000264043	enriched in NES
	OTU_4865	-0.265	0.9	1.874	0.198884	-4.54353	0.00032644	enriched in NES
	OTU_2599	NA	NA	NA	NA	-4.41386	0.0486921	enriched in NES
	OTU_405	0.721	0.499	-1.12	0.278947	-4.12239	0.0126631	enriched in NES
	OTU_1608	-0.819	0.642	2.406	0.184209	-4.02758	0.0190864	enriched in NES
	OTU_4542	NA	NA	NA	NA	-3.81863	0.0191793	enriched in NES
	OTU_1194	0.013	0.973	2.406	0.184209	-3.62914	0.0190864	enriched in NES
	OTU_1335	0	0	NA	NA	-3.62914	0.0190864	enriched in NES
	OTU_4053	0.439	0.721	2.649	0.0967746	-3.49335	0.029789	enriched in NES
	OTU_1008	-0.049	0.948	1.953	0.156103	-3.33136	0.0153431	enriched in NES
	OTU_444	0.831	0.541	-1.337	0.224093	-3.30822	0.00232656	enriched in NES
	OTU_1292	-0.688	0.691	2.438	0.113719	-3.06673	0.0485275	enriched in NES
	OTU_723	-0.085	0.947	-0.052	0.925662	-2.5098	0.000119692	enriched in NES
	OTU_1863	0.376	0.78	0.197	0.877158	-2.36118	0.0141503	enriched in NES
	OTU_1390	-1.782	0.142	1.185	0.26638	-2.29534	0.0320269	enriched in NES
	OTU_474	1.073	0.26	1.441	0.13329	-2.25155	0.0281283	enriched in NES
	OTU_969	1.304	0.384	-0.301	0.849136	-2.1472	0.0311052	enriched in NES
	OTU_2201	0.698	0.307	1.059	0.206199	-1.80095	0.0190864	enriched in NES
	OTU_295	0.226	0.774	0.002	0.942804	-1.62795	0.0125084	enriched in NES
	OTU_374	-0.434	0.642	-0.341	0.63799	-1.39851	0.0242616	enriched in NES
	OTU_32	0.176	0.619	-0.642	0.0825441	-1.11983	0.0445274	enriched in NES
	OTU_1855	NA	NA	-3.902	0.00981247	-2.18426	0.0590037	enriched in NRP
	OTU_531	-1.221	0.581	-4.451	3.40126e-09	-1.38578	0.235056	enriched in NRP
	OTU_279	-0.203	0.811	-1.975	1.32686e-05	-1.33596	0.172832	enriched in NRP
	OTU_917	3.208	0.088	-4.88	0.0181176	-1.22866	0.61611	enriched in NRP
	OTU_833	1.387	0.277	-2.257	0.0100425	-1.1962	0.0935259	enriched in NRP
	OTU_2	0.088	0.593	-3.479	2.39041e-16	-1.17953	0.250246	enriched in NRP
	OTU_846	2.156	0.306	-5.337	6.85243e-07	-1.15126	0.199745	enriched in NRP
	OTU_1490	2.613	0.184	-4.78	6.96472e-05	-1.11004	0.172832	enriched in NRP
	OTU_2413	2.63	0.15	-4.209	0.00163713	-1.0636	0.448084	enriched in NRP
	OTU_1979	NA	NA	-3.807	0.016208	-0.943262	0.50472	enriched in NRP
	OTU_244	0.759	0.227	-2.323	7.47132e-08	-0.811314	0.528921	enriched in NRP
	OTU_4912	1.695	0.223	-2.105	0.0404936	-0.732537	0.451541	enriched in NRP
	OTU_5275	0.237	0.917	-2.648	0.00295547	-0.692189	0.368329	enriched in NRP
	OTU_3553	2.32	0.312	-3.454	0.0346397	-0.593837	0.723931	enriched in NRP
	OTU_3547	-0.038	0.944	-0.703	0.0312747	-0.578598	0.0821406	enriched in NRP
	OTU_315	1.083	0.281	-2.662	1.9678e-11	-0.548618	0.317639	enriched in NRP
	OTU_195	0.708	0.083	-2.831	2.4463e-17	-0.54751	0.452839	enriched in NRP
	OTU_1495	1.763	0.545	-4.431	0.0328683	-0.544504	0.786675	enriched in NRP
	OTU_233	-0.07	0.915	-0.736	0.0209344	-0.543574	0.0559956	enriched in NRP
	OTU_2732	-0.487	0.317	-1.346	0.00558487	-0.540577	0.41856	enriched in NRP
	OTU_3655	0.07	0.927	-2.123	2.13649e-07	-0.535662	0.463437	enriched in NRP
	OTU_539	0.173	0.848	-2.429	1.36751e-11	-0.513824	0.366494	enriched in NRP
	OTU_888	0.448	NA	-5.421	1.0131e-05	-0.493602	0.814669	enriched in NRP
	OTU_1161	-0.728	0.642	-2.377	0.00108897	-0.480039	0.681776	enriched in NRP
	OTU_1305	-2.391	0.301	-2.779	0.00881091	-0.479649	0.751428	enriched in NRP
	OTU_132	0.116	0.756	-2.439	3.22676e-10	-0.46424	0.413685	enriched in NRP
	OTU_620	1.847	0.141	-2.39	0.0152543	-0.455446	0.666749	enriched in NRP
	OTU_2343	-0.514	NA	-4.013	0.00234882	-0.422364	0.764607	enriched in NRP
	OTU_4623	-0.77	0.105	-1.583	0.000825972	-0.418347	0.509431	enriched in NRP
	OTU_282	0.454	0.493	-1.578	0.000108138	-0.40377	0.541288	enriched in NRP
	OTU_847	-0.461	0.499	-1.302	0.00589679	-0.398528	0.596066	enriched in NRP
	OTU_1217	-0.357	0.717	-1.364	0.0106671	-0.391771	0.557701	enriched in NRP
	OTU_5925	-0.017	0.956	-2.233	1.19471e-08	-0.366521	0.192056	enriched in NRP
	OTU_1423	0.575	0.613	-2.591	0.0364653	-0.351401	0.887317	enriched in NRP
	OTU_5070	0.492	0.421	-1.653	1.19403e-05	-0.345069	0.499286	enriched in NRP
	OTU_238	-0.076	0.885	-2.083	4.31201e-08	-0.342378	0.607346	enriched in NRP
	OTU_188	-0.335	0.648	-1.169	0.0332574	-0.339589	0.705511	enriched in NRP
	OTU_221	-0.086	0.897	-0.802	0.00936817	-0.336898	0.439232	enriched in NRP
	OTU_873	1.212	0.312	-2.722	7.96954e-06	-0.32843	0.721694	enriched in NRP
	OTU_1314	2.007	0.493	-4.231	0.0159487	-0.327231	0.887317	enriched in NRP
	OTU_44	0.922	0.642	-8.096	8.56946e-10	-0.306604	0.883386	enriched in NRP
	OTU_433	-0.216	0.726	-1.539	0.000477125	-0.299641	0.572612	enriched in NRP
	OTU_369	0.23	0.785	-1.444	0.000985754	-0.27716	0.631359	enriched in NRP
	OTU_6211	-0.497	0.146	-2.315	2.90501e-07	-0.267773	0.775375	enriched in NRP
	OTU_60	0.167	0.833	-0.9	0.0307412	-0.259628	0.513207	enriched in NRP
	OTU_150	0.728	0.084	-0.957	0.000335005	-0.258287	0.64399	enriched in NRP
	OTU_2404	0.448	0.962	-3.265	0.0331513	-0.252917	0.889967	enriched in NRP
	OTU_165	-0.309	0.403	-1.013	0.000631213	-0.22175	0.809351	enriched in NRP
	OTU_134	-0.018	0.966	-0.847	0.0341533	-0.214626	0.753854	enriched in NRP
	OTU_1628	1.851	0.421	-4.187	0.0245055	-0.214206	0.904227	enriched in NRP
	OTU_5384	-0.366	0.509	-1.077	0.0175678	-0.206235	0.793336	enriched in NRP
	OTU_738	0.592	0.407	-1.203	0.00872602	-0.201551	0.745773	enriched in NRP
	OTU_2886	0.947	0.494	-2.608	0.0451878	-0.186206	0.912354	enriched in NRP
	OTU_5170	-0.206	0.804	-2.505	0.000294535	-0.182878	0.887317	enriched in NRP
	OTU_548	-0.596	0.608	-2.641	0.00327953	-0.17634	0.891524	enriched in NRP
	OTU_1680	-0.034	0.955	-2.228	4.40862e-09	-0.165604	0.82952	enriched in NRP
	OTU_5449	0.069	0.943	-2.823	0.000506633	-0.160887	0.898257	enriched in NRP
	OTU_927	0.913	0.541	-2.778	0.000629757	-0.160179	0.876954	enriched in NRP
	OTU_65	-0.138	0.824	-1.111	0.000112029	-0.157909	0.573144	enriched in NRP
	OTU_2880	0.49	0.816	-2.574	0.0140881	-0.14508	0.880336	enriched in NRP
	OTU_12	-0.253	0.344	-0.989	1.4421e-06	-0.131229	0.808322	enriched in NRP
	OTU_260	0.206	0.707	-2.378	6.17221e-12	-0.130301	0.819107	enriched in NRP
	OTU_2093	3.416	0.087	-2.989	0.0461287	-0.128854	0.922543	enriched in NRP
	OTU_4	-0.661	0.14	-1.862	3.03852e-05	-0.125299	0.848533	enriched in NRP
	OTU_765	0.916	0.69	-2.584	0.043631	-0.124071	0.915167	enriched in NRP
	OTU_224	0.331	0.604	-1.886	7.23804e-16	-0.12069	0.519791	enriched in NRP
	OTU_623	-0.009	0.98	-1.197	0.00702336	-0.120528	0.864673	enriched in NRP
	OTU_6370	-0.19	0.613	-0.785	0.00140761	-0.113023	0.853197	enriched in NRP
	OTU_176	-0.098	0.839	-2.05	4.62674e-20	-0.106955	0.848533	enriched in NRP
	OTU_1407	1.104	0.315	-2.403	0.000108138	-0.101094	0.887317	enriched in NRP
	OTU_858	-0.081	0.9	-1.38	0.000335005	-0.0718011	0.901901	enriched in NRP
	OTU_805	0.018	0.964	-2.189	2.27095e-05	-0.0625166	0.922543	enriched in NRP
	OTU_117	-0.312	0.381	-0.489	0.0447752	-0.0539643	0.878875	enriched in NRP
	OTU_634	2.157	0.119	-2.705	0.0124007	-0.0511163	0.942546	enriched in NRP
	OTU_1715	0.159	0.935	-2.26	0.0317327	-0.0456373	0.913013	enriched in NRP
	OTU_1998	0.106	0.898	-1.468	0.000186575	-0.0449441	0.93401	enriched in NRP
	OTU_1249	0.782	0.274	-2.959	1.71511e-15	-0.0366275	0.910146	enriched in NRP
	OTU_811	0.883	0.419	-2.347	9.91206e-06	-0.017765	0.934072	enriched in NRP
	OTU_386	0.251	0.587	-0.965	0.00278848	-0.00844436	0.933028	enriched in NRP
	OTU_565	1.336	0.132	-2.154	0.00197379	-0.0024059	0.915652	enriched in NRP
	OTU_554	-0.121	0.88	-1.562	0.0285842	0.00245438	0.963711	enriched in NRP
	OTU_2000	1.982	0.356	-3.958	0.0016841	0.00302241	0.997176	enriched in NRP
	OTU_3370	1.793	0.168	-3.284	0.00145022	0.00864965	0.897831	enriched in NRP
	OTU_1518	0.972	0.419	-2.627	0.0141766	0.00872996	0.943354	enriched in NRP
	OTU_332	-0.023	0.955	-2.389	5.3994e-11	0.0091541	0.962884	enriched in NRP
	OTU_1342	-0.042	0.955	-2.321	0.000111832	0.0169071	0.897831	enriched in NRP
	OTU_622	-0.61	0.339	-1.624	1.93932e-05	0.023599	0.910146	enriched in NRP
	OTU_2417	0.554	0.678	-2.304	0.00544432	0.0240505	0.903146	enriched in NRP
	OTU_183	0.402	0.292	-0.906	0.00257933	0.0307137	0.92975	enriched in NRP
	OTU_284	0.371	0.619	-0.839	0.0362455	0.0323104	0.897831	enriched in NRP
	OTU_75	0.474	0.182	-0.801	1.12698e-05	0.0339427	0.915652	enriched in NRP
	OTU_110	0.128	0.726	-1.071	1.34243e-09	0.0347521	0.915167	enriched in NRP
	OTU_202	-0.283	0.68	-1.334	0.000150293	0.035368	0.922543	enriched in NRP
	OTU_6027	0.154	0.834	-2.984	1.90474e-12	0.037843	0.934126	enriched in NRP
	OTU_2613	-0.15	0.742	-1.087	4.71632e-05	0.0383723	0.912354	enriched in NRP
	OTU_2213	NA	NA	-3.382	0.036919	0.0441257	0.906012	enriched in NRP
	OTU_1598	-0.284	0.358	-0.98	0.00950592	0.0479668	0.93401	enriched in NRP
	OTU_1222	0.266	0.774	-1.456	0.00378187	0.0755132	0.887317	enriched in NRP
	OTU_109	-0.286	0.307	-0.704	0.00585908	0.0755718	0.814669	enriched in NRP
	OTU_1564	2.139	0.054	-2.13	0.0209344	0.0793249	0.894975	enriched in NRP
	OTU_1032	1.259	0.357	-2.648	0.0014219	0.0817703	0.897831	enriched in NRP
	OTU_415	0.349	0.611	-2.691	4.88744e-19	0.0824676	0.888913	enriched in NRP
	OTU_1262	2.52	0.093	-3.1	0.00978127	0.0835053	0.897831	enriched in NRP
	OTU_680	2.001	0.169	-2.68	0.011474	0.0942014	0.931561	enriched in NRP
	OTU_247	0.088	0.883	-2.527	4.42693e-13	0.0951413	0.89343	enriched in NRP
	OTU_1917	0.258	0.883	-2.184	0.0119541	0.0973764	0.901901	enriched in NRP
	OTU_446	-0.362	0.335	-0.831	0.00383953	0.0991128	0.884173	enriched in NRP
	OTU_640	0.148	0.816	-0.989	0.00639937	0.0993818	0.866227	enriched in NRP
	OTU_19	0.123	0.848	-1.42	0.00271711	0.107131	0.898257	enriched in NRP
	OTU_4450	0.371	0.811	-2.729	0.000841489	0.109575	0.896705	enriched in NRP
	OTU_1916	-0.019	0.989	-4.558	0.013366	0.111813	0.948199	enriched in NRP
	OTU_982	1.703	0.099	-2.557	0.000343261	0.129584	0.86203	enriched in NRP
	OTU_1899	-0.368	0.338	-1.081	0.00926289	0.130756	0.859954	enriched in NRP
	OTU_645	0.164	0.897	-1.438	0.0203352	0.134372	0.89058	enriched in NRP
	OTU_78	-0.055	0.848	-0.829	7.51035e-10	0.140182	0.448084	enriched in NRP
	OTU_73	-0.096	0.816	-1.285	9.45542e-10	0.143072	0.785063	enriched in NRP
	OTU_5058	2.007	0.493	-3.358	0.0480462	0.145928	0.897831	enriched in NRP
	OTU_984	0.134	0.749	-0.72	0.0003266	0.153308	0.463278	enriched in NRP
	OTU_666	0.606	0.367	-1.253	0.00301775	0.159334	0.798201	enriched in NRP
	OTU_7	0.006	0.989	-1.299	0.000915517	0.160702	0.839135	enriched in NRP
	OTU_3412	-0.288	0.897	-2.225	0.0223596	0.170592	0.897831	enriched in NRP
	OTU_33	0.006	0.973	-1.676	0.00249059	0.173625	0.895246	enriched in NRP
	OTU_558	-0.076	0.834	-1.47	1.01301e-10	0.178239	0.389754	enriched in NRP
	OTU_5957	0.458	0.794	-2.584	0.00133328	0.180928	0.874415	enriched in NRP
	OTU_567	-0.564	0.602	-1.847	0.0014219	0.186872	0.809203	enriched in NRP
	OTU_1145	-0.402	0.732	-2.372	0.00102854	0.188624	0.864673	enriched in NRP
	OTU_960	-0.454	0.334	-2.026	1.16914e-15	0.190387	0.557701	enriched in NRP
	OTU_584	-0.106	0.922	-2.578	0.000407548	0.195589	0.887317	enriched in NRP
	OTU_479	-0.507	0.662	-3.488	1.3786e-07	0.19672	0.835791	enriched in NRP
	OTU_2943	-0.126	0.697	-1.856	1.34692e-38	0.201713	0.125259	enriched in NRP
	OTU_685	0.246	0.85	-3.008	6.83888e-06	0.202588	0.864673	enriched in NRP
	OTU_705	-0.059	0.894	-1.002	2.58569e-07	0.205183	0.353354	enriched in NRP
	OTU_199	1.06	0.195	-1.957	0.000688732	0.210457	0.851472	enriched in NRP
	OTU_458	0.047	0.956	-2.776	0.000356039	0.21291	0.793336	enriched in NRP
	OTU_1462	1.139	0.481	-3.444	1.83559e-05	0.213059	0.848835	enriched in NRP
	OTU_990	-0.279	0.913	-3.971	2.04797e-06	0.217371	0.848533	enriched in NRP
	OTU_102	-0.004	0.985	-2.133	5.23967e-38	0.228804	0.338991	enriched in NRP
	OTU_144	-0.211	0.552	-1.143	5.66113e-05	0.232042	0.702186	enriched in NRP
	OTU_34	0.015	0.973	-0.608	0.0205039	0.245929	0.435413	enriched in NRP
	OTU_399	0.3	0.801	-2.31	0.00117278	0.251867	0.816162	enriched in NRP
	OTU_1659	1.218	0.504	-2.675	0.00751441	0.255638	0.844261	enriched in NRP
	OTU_957	0.72	0.409	-1.797	0.00291652	0.2644	0.738293	enriched in NRP
	OTU_1391	0.894	0.328	-2.173	0.00179228	0.266821	0.782382	enriched in NRP
	OTU_5971	-0.159	0.858	-1.075	0.015942	0.274597	0.640677	enriched in NRP
	OTU_261	-0.233	0.818	-3.029	2.24262e-07	0.282304	0.767447	enriched in NRP
	OTU_2289	NA	NA	-4.706	0.00761662	0.282473	0.87785	enriched in NRP
	OTU_2577	NA	NA	-4.706	0.00761662	0.282473	0.87785	enriched in NRP
	OTU_1609	-0.569	0.811	-2.22	0.0320963	0.285057	0.836017	enriched in NRP
	OTU_896	0.666	0.605	-1.701	0.0218911	0.286262	0.793336	enriched in NRP
	OTU_692	0.486	0.609	-2.302	0.00216937	0.295132	0.815838	enriched in NRP
	OTU_1396	-0.514	NA	-3.935	0.0491292	0.303974	0.89601	enriched in NRP
	OTU_581	0.62	0.236	-0.858	0.0406674	0.310463	0.572612	enriched in NRP
	OTU_2545	1.029	0.141	-1.047	0.0383693	0.310736	0.666749	enriched in NRP
	OTU_216	0.662	0.419	-1.177	0.00103436	0.317509	0.17808	enriched in NRP
	OTU_5	-0.095	0.799	-1.579	2.90069e-08	0.319907	0.482798	enriched in NRP
	OTU_882	0.659	0.265	-2.543	5.0755e-07	0.32093	0.643825	enriched in NRP
	OTU_1524	-0.392	0.186	-1.218	0.00189729	0.334279	0.596066	enriched in NRP
	OTU_97	0.033	0.97	-2.036	0.0112085	0.34105	0.814669	enriched in NRP
	OTU_693	0.835	0.267	-0.827	0.0133318	0.349227	0.205824	enriched in NRP
	OTU_1104	0.169	0.939	-3.689	0.000748129	0.349759	0.855046	enriched in NRP
	OTU_24	-0.074	0.793	-2.826	6.21997e-26	0.35167	0.448933	enriched in NRP
	OTU_391	0.076	0.824	-2.507	3.00558e-10	0.351927	0.599147	enriched in NRP
	OTU_899	1.127	0.332	-2.1	0.0300806	0.352459	0.784792	enriched in NRP
	OTU_1260	1.763	0.545	-3.748	0.013698	0.379112	0.829349	enriched in NRP
	OTU_687	-0.11	0.927	-1.715	0.00410041	0.383373	0.519791	enriched in NRP
	OTU_522	0.899	0.182	-2.288	2.20892e-05	0.385524	0.575145	enriched in NRP
	OTU_283	-0.058	0.912	-1.62	8.97547e-06	0.386114	0.427721	enriched in NRP
	OTU_527	-0.32	0.817	-2.912	8.33942e-05	0.390342	0.681776	enriched in NRP
	OTU_6298	0.641	0.323	-1.306	0.00738748	0.392986	0.572612	enriched in NRP
	OTU_657	-0.602	0.348	-1.195	0.00179228	0.408715	0.448084	enriched in NRP
	OTU_45	-0.373	0.324	-1.131	0.00766582	0.412428	0.453079	enriched in NRP
	OTU_579	0.046	0.951	-1.479	0.000631213	0.416414	0.53183	enriched in NRP
	OTU_501	0.556	0.475	-4.04	1.14485e-08	0.421098	0.777508	enriched in NRP
	OTU_313	1.045	0.059	-1.265	0.0103096	0.42902	0.509431	enriched in NRP
	OTU_616	0.725	0.743	-2.966	0.00267646	0.443252	0.782382	enriched in NRP
	OTU_3229	0.466	0.493	-0.999	0.00363526	0.455915	0.297292	enriched in NRP
	OTU_1002	0.825	0.415	-4.548	1.02641e-17	0.458885	0.448084	enriched in NRP
	OTU_252	-0.17	0.78	-2.738	2.4422e-06	0.471241	0.660305	enriched in NRP
	OTU_3241	1.337	0.121	-1.251	0.00952059	0.471416	0.413685	enriched in NRP
	OTU_973	1.043	0.355	-3.674	2.47649e-05	0.471788	0.730168	enriched in NRP
	OTU_1129	-0.964	0.475	-1.931	0.00823135	0.483354	0.625883	enriched in NRP
	OTU_713	0.101	0.95	-2.327	0.0071209	0.491434	0.675986	enriched in NRP
	OTU_1123	-0.261	0.911	-3.259	0.000882821	0.499271	0.622527	enriched in NRP
	OTU_1670	0.616	0.44	-1.54	0.00479435	0.50979	0.483257	enriched in NRP
	OTU_1823	0.357	0.86	-3.892	1.2153e-06	0.534317	0.58429	enriched in NRP
	OTU_470	0.158	0.755	-1.341	0.00140324	0.549894	0.367266	enriched in NRP
	OTU_182	-0.19	0.785	-3.926	5.54698e-23	0.551732	0.278755	enriched in NRP
	OTU_1987	0.553	0.617	-3.39	5.21302e-05	0.573912	0.745773	enriched in NRP
	OTU_5038	1.01	0.182	-1.969	1.20218e-05	0.574401	0.297915	enriched in NRP
	OTU_1000	1.324	0.351	-2.947	0.000572389	0.575658	0.572682	enriched in NRP
	OTU_6222	0.888	0.423	-4.586	3.17394e-08	0.581649	0.567724	enriched in NRP
	OTU_4961	1.352	0.331	-3.678	0.00682649	0.582434	0.75934	enriched in NRP
	OTU_964	0.497	0.843	-3.222	0.0234121	0.585803	0.82424	enriched in NRP
	OTU_1359	1.497	0.613	-4.503	0.0246727	0.58903	0.835217	enriched in NRP
	OTU_414	0.085	0.937	-0.908	0.00958973	0.59787	0.0693119	enriched in NRP
	OTU_1264	1.454	0.232	-2.098	0.0191308	0.599939	0.616159	enriched in NRP
	OTU_5809	1.105	0.217	-2.905	2.98713e-06	0.600846	0.448084	enriched in NRP
	OTU_86	0.028	0.95	-1.878	0.00552021	0.601788	0.58429	enriched in NRP
	OTU_172	-0.071	0.912	-1.452	0.000399864	0.605327	0.203774	enriched in NRP
	OTU_1710	-0.462	0.767	-2.305	0.00454795	0.617345	0.566758	enriched in NRP
	OTU_4236	-0.171	0.749	-1.249	0.000176586	0.61884	0.147929	enriched in NRP
	OTU_273	0.407	0.407	-1.96	3.8871e-13	0.628044	0.0590037	enriched in NRP
	OTU_357	0.259	0.869	-2.139	0.00355259	0.637168	0.353968	enriched in NRP
	OTU_337	0.227	0.845	-1.928	0.010687	0.656332	0.576429	enriched in NRP
	OTU_1948	0.814	0.78	-4.209	0.000282521	0.659624	0.572612	enriched in NRP
	OTU_1282	0.261	0.843	-4.361	6.02184e-25	0.669731	0.203774	enriched in NRP
	OTU_4365	-0.234	0.577	-2.613	2.04797e-06	0.68115	0.360965	enriched in NRP
	OTU_642	-0.399	0.864	-2.858	0.00476714	0.69915	0.555769	enriched in NRP
	OTU_4278	0.531	0.46	-4.671	1.81986e-24	0.70058	0.198078	enriched in NRP
	OTU_570	0.243	0.653	-0.871	0.0271585	0.720485	0.166916	enriched in NRP
	OTU_897	0.467	0.442	-1.675	2.54616e-05	0.723195	0.129244	enriched in NRP
	OTU_2064	-0.025	0.953	-2.761	0.00470853	0.724375	0.553388	enriched in NRP
	OTU_1484	0.511	0.461	-1.003	0.021682	0.737705	0.17579	enriched in NRP
	OTU_196	0.708	0.15	-1.643	3.88098e-08	0.750336	0.0837622	enriched in NRP
	OTU_3401	1.464	0.307	-3.152	8.58776e-05	0.753805	0.366494	enriched in NRP
	OTU_778	0.446	0.564	-5.204	8.545e-18	0.754814	0.287618	enriched in NRP
	OTU_3097	-0.196	0.851	-1.558	0.0100489	0.760864	0.411722	enriched in NRP
	OTU_591	1.026	0.227	-3.344	7.43244e-09	0.771666	0.528809	enriched in NRP
	OTU_2099	0.951	0.541	-2.618	0.00225854	0.777257	0.449783	enriched in NRP
	OTU_2397	-2.472	0.141	-1.978	0.0116175	0.786977	0.442854	enriched in NRP
	OTU_1136	1.369	0.312	-3.137	3.17187e-05	0.792742	0.367758	enriched in NRP
	OTU_1943	-1.289	0.45	-2.094	0.00770941	0.794023	0.408661	enriched in NRP
	OTU_849	-0.217	0.869	-1.88	0.0435624	0.795045	0.448398	enriched in NRP
	OTU_670	-0.268	0.559	-1.001	0.0231173	0.819089	0.0861072	enriched in NRP
	OTU_1088	1.872	0.093	-3.174	2.57651e-06	0.824099	0.340646	enriched in NRP
	OTU_192	-0.139	0.842	-1.499	0.000401342	0.830354	0.0821406	enriched in NRP
	OTU_1069	2.087	0.306	-3.809	0.00370968	0.847531	0.551489	enriched in NRP
	OTU_760	-1.748	0.529	-4.366	1.68133e-07	0.867576	0.229059	enriched in NRP
	OTU_712	-0.25	0.831	-2.735	8.44231e-10	0.875086	0.063283	enriched in NRP
	OTU_1033	-1.29	0.427	-2.634	0.0119919	0.881794	0.551489	enriched in NRP
	OTU_483	1.492	0.06	-1.567	0.000532275	0.894303	0.144705	enriched in NRP
	OTU_236	0.615	0.518	-4.421	4.94984e-20	0.897162	0.0590037	enriched in NRP
	OTU_1662	0.7	0.52	-1.761	0.0174484	0.901136	0.448084	enriched in NRP
	OTU_6182	0.085	0.912	-1.117	0.0320623	0.909293	0.0911902	enriched in NRP
	OTU_2532	0.835	0.382	-1.652	0.0343554	0.910017	0.436917	enriched in NRP
	OTU_1464	3.032	0.119	-5.353	0.000205013	0.910713	0.499081	enriched in NRP
	OTU_452	1.085	0.236	-4.752	1.06303e-25	0.913376	0.0584808	enriched in NRP
	OTU_185	-0.368	0.552	-1.798	0.00177025	0.914805	0.221549	enriched in NRP
	OTU_1159	-0.318	0.888	-3.449	8.95022e-05	0.916351	0.320643	enriched in NRP
	OTU_996	1.932	0.075	-2.737	0.00952059	0.920857	0.46444	enriched in NRP
	OTU_585	0.048	0.953	-1.857	0.00881091	0.968035	0.3705	enriched in NRP
	OTU_3182	2.924	0.111	-4.542	0.00950592	0.994662	0.528809	enriched in NRP
	OTU_650	1.078	0.357	-3.503	6.06988e-07	1.00672	0.119337	enriched in NRP
	OTU_1331	1.395	0.083	-1.553	0.0270007	1.00851	0.380551	enriched in NRP
	OTU_572	-0.343	0.842	-3.764	2.35931e-05	1.012	0.392848	enriched in NRP
	OTU_865	0.808	0.294	-2.777	1.47729e-07	1.02117	0.107494	enriched in NRP
	OTU_1290	-0.186	0.829	-1.159	0.0175678	1.03219	0.0879548	enriched in NRP
	OTU_1915	1.593	0.198	-2.006	0.0462044	1.03685	0.448084	enriched in NRP
	OTU_496	0.067	0.945	-3.009	7.56241e-05	1.0456	0.128155	enriched in NRP
	OTU_1449	1.126	0.372	-3.89	5.18868e-05	1.04949	0.295875	enriched in NRP
	OTU_1862	1.492	0.492	-3.757	0.0118	1.06377	0.489087	enriched in NRP
	OTU_2571	2.156	0.306	-3.967	0.0156019	1.06466	0.582891	enriched in NRP
	OTU_1116	1.602	0.577	-4.554	0.000173872	1.08019	0.287948	enriched in NRP
	OTU_5892	-0.078	0.951	-2.369	0.0113671	1.09407	0.317051	enriched in NRP
	OTU_1200	0.056	0.956	-2.177	0.000104856	1.10498	0.109295	enriched in NRP
	OTU_5343	NA	NA	-4.706	0.00761662	1.14051	0.424768	enriched in NRP
	OTU_2926	NA	NA	-6.284	2.7499e-07	1.14872	0.231645	enriched in NRP
	OTU_1570	NA	NA	-5.546	3.80218e-05	1.14949	0.335701	enriched in NRP
	OTU_2097	0.448	NA	-4.706	0.00761662	1.15741	0.454965	enriched in NRP
	OTU_342	0.366	0.708	-4.053	7.52201e-08	1.17307	0.362482	enriched in NRP
	OTU_1099	0.929	NA	-4.431	0.0328683	1.1741	0.64399	enriched in NRP
	OTU_718	1.983	0.151	-3.361	0.00327044	1.17615	0.203774	enriched in NRP
	OTU_2339	1.763	0.545	-4.542	0.00950592	1.17668	0.421321	enriched in NRP
	OTU_746	0.749	0.356	-2.449	5.65572e-05	1.18093	0.0590037	enriched in NRP
	OTU_766	1.492	0.136	-1.677	0.0119488	1.19964	0.174614	enriched in NRP
	OTU_905	1.656	0.215	-2.402	0.00815052	1.20822	0.283866	enriched in NRP
	OTU_1333	1.215	0.136	-2.339	0.021682	1.21051	0.396118	enriched in NRP
	OTU_870	1.609	0.147	-1.975	0.0286458	1.21174	0.199745	enriched in NRP
	OTU_3150	0.929	NA	-4.132	0.0445495	1.22174	0.610814	enriched in NRP
	OTU_1261	0.866	0.469	-1.87	0.0129536	1.23155	0.180678	enriched in NRP
	OTU_1925	2.764	0.158	-5.057	0.00410041	1.2588	0.380931	enriched in NRP
	OTU_2840	1.402	0.224	-2.032	0.0423236	1.29875	0.323016	enriched in NRP
	OTU_1845	-0.995	NA	-3.529	0.0340133	1.31331	0.541614	enriched in NRP
	OTU_2554	-0.514	NA	-4.205	0.00282306	1.32572	0.327635	enriched in NRP
	OTU_1952	3.141	0.127	-4.164	0.00355149	1.32714	0.393202	enriched in NRP
	OTU_1783	1.35	0.316	-3.051	0.000431192	1.35182	0.103626	enriched in NRP
	OTU_1106	-0.723	0.737	-2.335	0.00837514	1.35563	0.198385	enriched in NRP
	OTU_1040	1.241	0.486	-5.631	1.08929e-13	1.35919	0.0687845	enriched in NRP
	OTU_1991	3.218	0.168	-4.706	0.00761662	1.37132	0.367266	enriched in NRP
	OTU_2834	-0.075	0.955	-3.381	3.6041e-05	1.37439	0.172832	enriched in NRP
	OTU_955	0.028	0.959	-1.72	0.00299371	1.39558	0.063283	enriched in NRP
	OTU_5385	0.217	0.918	-2.371	0.0154491	1.39685	0.250246	enriched in NRP
	OTU_465	1.682	0.182	-1.834	0.0245055	1.4163	0.0680962	enriched in NRP
	OTU_6269	0.929	NA	-5.353	0.000205013	1.41708	0.20513	enriched in NRP
	OTU_740	1.074	0.419	-3.518	0.000693467	1.42878	0.323016	enriched in NRP
	OTU_1757	-0.514	NA	-4.52	0.00544432	1.44392	0.340847	enriched in NRP
	OTU_1345	0.692	0.714	-2.353	0.0238464	1.44392	0.340847	enriched in NRP
	OTU_5388	-0.32	0.901	-2.159	0.0315126	1.46159	0.23192	enriched in NRP
	OTU_1208	1.763	0.545	-3.382	0.036919	1.46677	0.442854	enriched in NRP
	OTU_310	1.62	0.191	-2.049	0.0384298	1.47045	0.297292	enriched in NRP
	OTU_931	1.139	0.149	-1.461	0.0246383	1.4727	0.153352	enriched in NRP
	OTU_473	0.683	0.298	-2.57	0.00128652	1.47519	0.235815	enriched in NRP
	OTU_4050	1.82	0.223	-4.605	0.000234584	1.48661	0.165744	enriched in NRP
	OTU_974	0.383	0.726	-1.38	0.0325982	1.50799	0.190715	enriched in NRP
	OTU_4167	3.659	0.14	-4.375	0.00616782	1.53671	0.378406	enriched in NRP
	OTU_3134	-0.995	NA	-4.19	0.000426062	1.5601	0.155235	enriched in NRP
	OTU_1826	0.98	0.599	-3.034	0.000889284	1.56092	0.16041	enriched in NRP
	OTU_594	1.653	0.182	-5.27	0.000103941	1.56126	0.25349	enriched in NRP
	OTU_1725	0.433	0.857	-2.252	0.0295193	1.58153	0.252058	enriched in NRP
	OTU_1652	-2.175	0.298	-3.824	7.72945e-05	1.58213	0.129244	enriched in NRP
	OTU_161	0.56	0.712	-2.364	0.00616782	1.59185	0.063283	enriched in NRP
	OTU_5180	0.259	0.842	-2.723	0.00162575	1.59648	0.117996	enriched in NRP
	OTU_1446	NA	NA	-6.177	1.21669e-05	1.59824	0.129244	enriched in NRP
	OTU_2101	-0.033	NA	-4.035	0.00976207	1.64262	0.367266	enriched in NRP
	OTU_1393	-1.449	0.518	-3.959	2.61231e-05	1.67703	0.105038	enriched in NRP
	OTU_1889	-0.243	0.911	-3.295	0.000274473	1.68165	0.109295	enriched in NRP
	OTU_1263	1.835	0.19	-1.376	0.035267	1.68715	0.088946	enriched in NRP
	OTU_1119	0.014	0.979	-3.444	0.00471211	1.69897	0.199944	enriched in NRP
	OTU_1148	0.743	0.721	-2.379	0.0493399	1.70068	0.166546	enriched in NRP
	OTU_774	0.3	0.912	-6.391	1.16526e-07	1.70242	0.171605	enriched in NRP
	OTU_1815	3.141	0.127	-5.305	7.45738e-05	1.71257	0.121556	enriched in NRP
	OTU_890	1.455	0.178	-1.589	0.0386829	1.7256	0.16041	enriched in NRP
	OTU_953	0.288	0.738	-2.219	0.00126619	1.73193	0.0932917	enriched in NRP
	OTU_2686	2.209	0.25	-4.147	0.00128839	1.74874	0.171605	enriched in NRP
	OTU_820	1.031	0.415	-1.992	0.0143185	1.75286	0.0999856	enriched in NRP
	OTU_3810	3.032	0.119	-5.142	0.000119027	1.76449	0.12214	enriched in NRP
	OTU_624	0.816	0.386	-3.211	9.88987e-06	1.78825	0.0683504	enriched in NRP
	OTU_2282	0.616	0.751	-2.808	0.0191079	1.79294	0.197079	enriched in NRP
	OTU_68	0.164	0.862	-2.837	0.00091713	1.79809	0.063283	enriched in NRP
	OTU_676	0.82	0.182	-2.646	0.000841385	1.81808	0.0753932	enriched in NRP
	OTU_1112	0.654	0.638	-2.588	0.0004026	1.82416	0.0590037	enriched in NRP
	OTU_1688	2.539	0.267	-6.223	0.000665804	1.86492	0.166949	enriched in NRP
	OTU_1128	-0.033	NA	-5.709	4.23489e-06	1.86683	0.0837622	enriched in NRP
	OTU_983	-2.314	0.236	-2.581	0.00696177	1.88171	0.0898341	enriched in NRP
	OTU_1516	2.167	0.305	-5.291	5.12933e-06	1.90305	0.072226	enriched in NRP
	OTU_491	1.47	0.098	-3.825	8.97547e-06	1.99505	0.0917035	enriched in NRP
	OTU_1093	-0.027	0.958	-2.427	0.0236492	2.00442	0.151284	enriched in NRP
	OTU_995	0	0	-5.607	0.00179228	2.00447	0.320144	enriched in NRP
	OTU_1110	2.354	0.245	-5.387	0.00234882	2.04604	0.166949	enriched in NRP
	OTU_3108	1.306	0.394	-3.962	0.00185922	2.08344	0.090831	enriched in NRP
	OTU_818	1.154	0.334	-3.184	4.93422e-05	2.08902	0.0500066	enriched in NRP
	OTU_2146	-0.597	0.809	-2.575	0.00696012	2.15134	0.0924446	enriched in NRP
	OTU_562	0.805	0.324	-5.708	1.02023e-10	2.16227	0.0753932	enriched in NRP
	OTU_1479	1.763	0.545	-5.4	0.00210454	2.17541	0.266875	enriched in NRP
	OTU_1567	0.827	0.579	-2.028	0.0140996	2.19932	0.0924111	enriched in NRP
	OTU_1836	1.763	0.545	-5.022	0.000108138	2.21251	0.0837622	enriched in NRP
	OTU_1105	-2.754	0.169	-3.119	0.00713618	2.25585	0.140225	enriched in NRP
	OTU_1058	2.053	0.094	-4.259	0.000178043	2.27905	0.0584808	enriched in NRP
	OTU_1544	3.02	0.108	-3.736	0.0167695	2.2921	0.191776	enriched in NRP
	OTU_599	0.736	0.312	-3.095	2.9412e-05	2.30674	0.0567696	enriched in NRP
	OTU_2865	1.963	0.06	-2.479	0.0148283	2.34038	0.11296	enriched in NRP
	OTU_3146	0.201	0.883	-3.344	0.00410071	2.49627	0.0932917	enriched in NRP
	OTU_1026	1.897	0.162	-3.074	0.00808376	2.52603	0.0634649	enriched in NRP
	OTU_4147	NA	NA	-5.489	0.0116356	2.70954	0.229059	enriched in NRP
	OTU_2724	1.763	0.545	-4.132	0.0445495	2.71381	0.284437	enriched in NRP
	OTU_2909	NA	NA	-4.132	0.0445495	2.71381	0.284437	enriched in NRP
	OTU_1990	0.448	NA	-4.647	0.00134465	2.72207	0.0822914	enriched in NRP
	OTU_1829	2.63	0.15	-4.706	0.00761662	2.77651	0.126089	enriched in NRP
	OTU_3160	0.448	NA	-4.706	0.00761662	2.77651	0.126089	enriched in NRP
	OTU_485	0.287	0.839	-4.894	0.000225526	2.78989	0.0988569	enriched in NRP
	OTU_1447	0.929	NA	-3.892	0.015942	2.92421	0.12214	enriched in NRP
	OTU_1172	1.045	0.396	-1.909	0.0450708	2.94573	0.0590037	enriched in NRP
	OTU_2687	3.213	0.182	-4.431	0.0328683	3.02076	0.231645	enriched in NRP
	OTU_1801	NA	NA	-4.995	0.00429587	3.06318	0.0932917	enriched in NRP
	OTU_3760	NA	NA	-4.542	0.00950592	3.08782	0.117996	enriched in NRP
	OTU_5193	NA	NA	-4.169	0.035267	3.17467	0.176146	enriched in NRP
	OTU_2007	-1.921	0.403	-2.272	0.0325333	3.1958	0.0559956	enriched in NRP
	OTU_1642	0.448	NA	-4.132	0.0445495	3.22098	0.198078	enriched in NRP
	OTU_2402	NA	NA	-4.132	0.0445495	3.22098	0.198078	enriched in NRP
	OTU_2490	NA	NA	-4.132	0.0445495	3.22098	0.198078	enriched in NRP
	OTU_2672	3.511	0.149	-4.132	0.0445495	3.22098	0.198078	enriched in NRP
	OTU_3142	NA	NA	-4.132	0.0445495	3.22098	0.198078	enriched in NRP
	OTU_3460	NA	NA	-4.132	0.0445495	3.22098	0.198078	enriched in NRP
	OTU_3963	NA	NA	-4.132	0.0445495	3.22098	0.198078	enriched in NRP
	OTU_1945	2.007	0.493	-4.165	0.0126771	3.22268	0.112756	enriched in NRP
	OTU_2596	0.448	NA	-4.706	0.00761662	3.24871	0.109295	enriched in NRP
	OTU_4264	0.448	NA	-4.733	0.00713618	3.31564	0.123154	enriched in NRP
	OTU_4274	2.876	0.323	-4.88	0.0181176	3.47643	0.171605	enriched in NRP
	OTU_1535	NA	NA	-6.349	0.00341173	3.4829	0.128333	enriched in NRP
	OTU_5624	-0.033	NA	-4.958	0.00278715	3.49506	0.0634649	enriched in NRP
	OTU_1808	NA	NA	-4.431	0.0328683	3.52181	0.171605	enriched in NRP
	OTU_1822	NA	NA	-4.431	0.0328683	3.52181	0.171605	enriched in NRP
	OTU_1930	NA	NA	-4.431	0.0328683	3.52181	0.171605	enriched in NRP
	OTU_2251	NA	NA	-4.431	0.0328683	3.52181	0.171605	enriched in NRP
	OTU_2320	NA	NA	-4.431	0.0328683	3.52181	0.171605	enriched in NRP
	OTU_2423	NA	NA	-4.431	0.0328683	3.52181	0.171605	enriched in NRP
	OTU_2770	NA	NA	-4.431	0.0328683	3.52181	0.171605	enriched in NRP
	OTU_2778	NA	NA	-4.431	0.0328683	3.52181	0.171605	enriched in NRP
	OTU_2985	NA	NA	-4.431	0.0328683	3.52181	0.171605	enriched in NRP
	OTU_3480	NA	NA	-4.431	0.0328683	3.52181	0.171605	enriched in NRP
	OTU_3526	NA	NA	-4.431	0.0328683	3.52181	0.171605	enriched in NRP
	OTU_2959	NA	NA	-4.542	0.00950592	3.5575	0.0966338	enriched in NRP
	OTU_2073	NA	NA	-4.528	0.0054255	3.59047	0.0725263	enriched in NRP
	OTU_1610	NA	NA	-5.489	0.0116356	3.60763	0.135316	enriched in NRP
	OTU_1558	NA	NA	-4.585	0.029937	3.67948	0.166546	enriched in NRP
	OTU_2465	NA	NA	-4.585	0.029937	3.67948	0.166546	enriched in NRP
	OTU_2623	NA	NA	-4.585	0.029937	3.67948	0.166546	enriched in NRP
	OTU_2766	NA	NA	-4.585	0.029937	3.67948	0.166546	enriched in NRP
	OTU_3165	NA	NA	-4.585	0.029937	3.67948	0.166546	enriched in NRP
	OTU_3420	2.007	0.493	-4.585	0.029937	3.67948	0.166546	enriched in NRP
	OTU_1324	0	0	-5.263	0.013698	3.86758	0.137036	enriched in NRP
	OTU_1800	-0.514	NA	-4.321	0.0101494	3.89176	0.075924	enriched in NRP
	OTU_1299	1.371	0.621	-4.341	0.00410041	3.90814	0.063283	enriched in NRP
	OTU_2323	0.929	NA	-5.387	0.00234882	3.92506	0.063283	enriched in NRP
	OTU_1673	0.448	NA	-4.88	0.0181176	3.97153	0.128333	enriched in NRP
	OTU_1966	NA	NA	-4.88	0.0181176	3.97153	0.128333	enriched in NRP
	OTU_2040	NA	NA	-4.88	0.0181176	3.97153	0.128333	enriched in NRP
	OTU_2069	NA	NA	-4.88	0.0181176	3.97153	0.128333	enriched in NRP
	OTU_2205	NA	NA	-4.88	0.0181176	3.97153	0.128333	enriched in NRP
	OTU_3317	NA	NA	-4.88	0.0181176	3.97153	0.128333	enriched in NRP
	OTU_4802	3.19	0.136	-4.88	0.0181176	3.97153	0.128333	enriched in NRP
	OTU_4877	NA	NA	-4.88	0.0181176	3.97153	0.128333	enriched in NRP
	OTU_6322	0.448	NA	-4.88	0.0181176	3.97153	0.128333	enriched in NRP
	OTU_2094	1.04	0.65	-3.115	0.0218843	4.0094	0.0667824	enriched in NRP
	OTU_1095	-0.514	NA	-4.446	0.00985667	4.02041	0.0723776	enriched in NRP
	OTU_618	NA	NA	-7.328	0.0216459	4.06401	0.0603326	enriched in NRP
	OTU_1487	-0.636	0.726	-2.087	0.0459348	4.06937	0.0647414	enriched in NRP
	OTU_1708	NA	NA	-4.995	0.0170788	4.08896	0.126089	enriched in NRP
	OTU_1726	2.385	0.419	-4.995	0.0170788	4.08896	0.126089	enriched in NRP
	OTU_2017	NA	NA	-5.489	0.0116356	4.09682	0.126089	enriched in NRP
	OTU_1242	4.234	0.069	-4.551	0.0092736	4.12879	0.0693119	enriched in NRP
	OTU_1121	2.876	0.323	-5.101	0.015942	4.19779	0.12214	enriched in NRP
	OTU_1587	NA	NA	-5.101	0.015942	4.19779	0.12214	enriched in NRP
	OTU_1914	NA	NA	-5.101	0.015942	4.19779	0.12214	enriched in NRP
	OTU_2121	NA	NA	-5.101	0.015942	4.19779	0.12214	enriched in NRP
	OTU_2191	NA	NA	-5.101	0.015942	4.19779	0.12214	enriched in NRP
	OTU_2439	NA	NA	-5.101	0.015942	4.19779	0.12214	enriched in NRP
	OTU_3216	NA	NA	-5.101	0.015942	4.19779	0.12214	enriched in NRP
	OTU_1315	NA	NA	-5.263	0.013698	4.3588	0.11473	enriched in NRP
	OTU_1360	NA	NA	-5.263	0.013698	4.3588	0.11473	enriched in NRP
	OTU_1398	NA	NA	-5.263	0.013698	4.3588	0.11473	enriched in NRP
	OTU_2160	NA	NA	-5.263	0.013698	4.3588	0.11473	enriched in NRP
	OTU_2368	0.448	NA	-5.263	0.013698	4.3588	0.11473	enriched in NRP
	OTU_1338	0	0	-5.824	0.00638425	4.43203	0.100772	enriched in NRP
	OTU_1890	NA	NA	-5.434	0.00229223	4.44584	0.0516074	enriched in NRP
	OTU_1295	NA	NA	-5.489	0.0116356	4.58617	0.109295	enriched in NRP
	OTU_1554	NA	NA	-5.648	0.00715096	4.74238	0.0837622	enriched in NRP
	OTU_2110	NA	NA	-5.648	0.00715096	4.74238	0.0837622	enriched in NRP
	OTU_2587	NA	NA	-5.648	0.00715096	4.74238	0.0837622	enriched in NRP
	OTU_4810	NA	NA	-5.648	0.00715096	4.74238	0.0837622	enriched in NRP
	OTU_6036	NA	NA	-5.648	0.00715096	4.74238	0.0837622	enriched in NRP
	OTU_1077	2.385	0.419	-5.76	0.00654522	4.85459	0.0821406	enriched in NRP
	OTU_1139	NA	NA	-5.76	0.00654522	4.85459	0.0821406	enriched in NRP
	OTU_1244	NA	NA	-5.76	0.00654522	4.85459	0.0821406	enriched in NRP
	OTU_1632	-0.514	NA	-4.787	0.00902891	4.85459	0.0821406	enriched in NRP
	OTU_1748	NA	NA	-5.924	0.00585889	5.01941	0.0767153	enriched in NRP
	OTU_831	0	0	-5.982	0.0057219	5.07775	0.0760023	enriched in NRP
	OTU_1168	NA	NA	-6.037	0.00557861	5.13383	0.0753932	enriched in NRP
	OTU_920	2.156	0.306	-6.547	0.00278782	5.15687	0.063283	enriched in NRP
	OTU_1435	NA	NA	-6.201	0.00447828	5.29749	0.0680962	enriched in NRP
	OTU_2149	NA	NA	-6.349	0.00341173	5.44422	0.0606937	enriched in NRP
	OTU_1270	NA	NA	-6.419	0.00324783	5.51418	0.0590037	enriched in NRP
	OTU_1436	NA	NA	-6.46	0.00320394	5.55586	0.0590037	enriched in NRP
	OTU_1844	0.448	NA	-6.46	0.00320394	5.55586	0.0590037	enriched in NRP
	OTU_928	0	0	-6.769	0.00249059	5.86453	0.0521398	enriched in NRP
	OTU_157	1.269	0.191	-0.757	0.0418262	0.715408	0.0177722	enriched in NRP,depleted in NES
	OTU_218	1.206	0.168	-1.46	2.95938e-05	0.734324	0.00745546	enriched in NRP,depleted in NES
	OTU_306	0.74	0.193	-0.84	0.0343035	1.10094	0.0235725	enriched in NRP,depleted in NES
	OTU_492	0.892	0.31	-2.765	3.65748e-08	1.10438	0.0242616	enriched in NRP,depleted in NES
	OTU_756	0	0.957	-1.264	0.0311917	1.39939	0.0144704	enriched in NRP,depleted in NES
	OTU_627	1.294	0.065	-3.648	3.53977e-10	1.44959	0.0155223	enriched in NRP,depleted in NES
	OTU_706	0.895	0.286	-2.96	3.07453e-07	1.63732	0.0176993	enriched in NRP,depleted in NES
	OTU_3577	-0.251	0.866	-4.73	1.01301e-10	1.81961	0.0179055	enriched in NRP,depleted in NES
	OTU_1553	-0.033	NA	-6.832	1.66013e-12	1.86272	0.00608388	enriched in NRP,depleted in NES
	OTU_1016	-0.194	0.892	-2.299	0.000693467	1.88917	0.046492	enriched in NRP,depleted in NES
	OTU_1591	-0.504	0.78	-3.649	1.83181e-05	2.02879	0.0429507	enriched in NRP,depleted in NES
	OTU_1685	-0.045	0.948	-3.541	1.11445e-08	2.11396	0.00745546	enriched in NRP,depleted in NES
	OTU_4565	-0.541	0.683	-2.961	0.000148802	2.12628	0.0415783	enriched in NRP,depleted in NES
	OTU_602	0.322	0.712	-2.475	0.00204323	2.24694	0.0284088	enriched in NRP,depleted in NES
	OTU_1312	1.324	0.282	-3.032	0.000155433	2.27033	0.0211301	enriched in NRP,depleted in NES
	OTU_255	0.935	0.052	-5.384	2.48424e-13	2.27698	0.00830095	enriched in NRP,depleted in NES
	OTU_3812	0.433	0.633	-3.669	4.16958e-06	2.28401	0.0179055	enriched in NRP,depleted in NES
	OTU_3841	0.448	NA	-6.332	5.4025e-13	2.32179	0.00232656	enriched in NRP,depleted in NES
	OTU_681	-0.279	0.913	-5.487	7.16137e-09	2.32541	0.0123377	enriched in NRP,depleted in NES
	OTU_146	0.944	0.155	-6.038	1.03739e-14	2.33403	0.00602838	enriched in NRP,depleted in NES
	OTU_1352	0.929	NA	-5.752	2.38025e-05	2.39301	0.0485275	enriched in NRP,depleted in NES
	OTU_1674	0.718	0.799	-5.147	3.17187e-05	2.41747	0.046492	enriched in NRP,depleted in NES
	OTU_2670	0.426	0.78	-2.536	4.76659e-06	2.46017	0.000927512	enriched in NRP,depleted in NES
	OTU_674	0.807	0.28	-3.424	1.84624e-06	2.46519	0.00187641	enriched in NRP,depleted in NES
	OTU_699	0.308	0.796	-5.022	1.22552e-12	2.48918	0.000927512	enriched in NRP,depleted in NES
	OTU_854	1.093	0.198	-1.875	0.00215176	2.49307	0.0127212	enriched in NRP,depleted in NES
	OTU_1377	0.05	0.955	-2.475	0.00374769	2.49971	0.0298945	enriched in NRP,depleted in NES
	OTU_742	1.434	0.186	-3.661	0.000450084	2.69097	0.04	enriched in NRP,depleted in NES
	OTU_1429	-2.391	0.301	-4.171	3.17187e-05	2.73664	0.019865	enriched in NRP,depleted in NES
	OTU_271	-0.724	0.419	-4.699	2.1928e-06	3.01993	0.0281283	enriched in NRP,depleted in NES
	OTU_1859	2.539	0.267	-4.951	0.000234584	3.02494	0.0362796	enriched in NRP,depleted in NES
	OTU_923	2.98	0.098	-7.397	6.43154e-07	3.11098	0.0147906	enriched in NRP,depleted in NES
	OTU_1795	-2.17	0.28	-3.864	8.49176e-05	3.1235	0.017956	enriched in NRP,depleted in NES
	OTU_1521	-0.444	0.843	-1.898	0.0450583	3.13639	0.0394556	enriched in NRP,depleted in NES
	OTU_1339	-2.502	0.222	-2.175	0.0272667	3.1893	0.0448803	enriched in NRP,depleted in NES
	OTU_1463	0.814	0.78	-4.216	0.000210551	3.24199	0.0191266	enriched in NRP,depleted in NES
	OTU_1586	0.929	NA	-5.353	0.000205013	3.41875	0.0281283	enriched in NRP,depleted in NES
	OTU_1271	-1.487	0.62	-4.645	0.00118806	3.42022	0.0340704	enriched in NRP,depleted in NES
	OTU_2419	1.991	0.349	-4.173	0.00265981	3.66711	0.029789	enriched in NRP,depleted in NES
	OTU_2130	-0.926	0.749	-2.808	0.0179426	3.66711	0.029789	enriched in NRP,depleted in NES
	OTU_1511	0.636	0.833	-3.19	0.00823135	3.9215	0.0211658	enriched in NRP,depleted in NES
	OTU_2712	3.404	0.052	-4.937	0.000794793	4.00199	0.0281283	enriched in NRP,depleted in NES
	OTU_3570	0.929	NA	-5.022	0.000108138	4.04433	0.00745546	enriched in NRP,depleted in NES
	OTU_3770	0.548	0.751	-2.909	0.00261412	4.10705	0.0191228	enriched in NRP,depleted in NES
	OTU_1475	-0.033	1	-5.099	0.000104083	4.11375	0.0126947	enriched in NRP,depleted in NES
	OTU_1041	-0.029	0.97	-2.172	0.00470853	4.44637	0.00454977	enriched in NRP,depleted in NES
	OTU_3128	1.118	0.435	-3.292	0.000744644	4.69009	0.00440846	enriched in NRP,depleted in NES
	OTU_1561	0.929	NA	-5.607	0.00179228	4.69466	0.0414958	enriched in NRP,depleted in NES
	OTU_2416	1.5	0.485	-3.892	7.16145e-05	4.75141	0.000776233	enriched in NRP,depleted in NES
	OTU_5932	0.762	0.663	-3.258	0.00412309	4.81314	0.0187934	enriched in NRP,depleted in NES
	OTU_4535	2.485	0.227	-5.937	5.12933e-06	4.95213	0.00153424	enriched in NRP,depleted in NES
	OTU_1235	0.929	NA	-6.048	0.000259393	5.12912	0.017397	enriched in NRP,depleted in NES
	OTU_490	NA	NA	-8.002	0.0189619	5.13333	0.0444955	enriched in NRP,depleted in NES
	OTU_1245	-0.628	0.642	-2.488	0.00745881	5.21547	0.00632287	enriched in NRP,depleted in NES
	OTU_786	-2.231	0.442	-3.991	0.00950592	5.29166	0.0270565	enriched in NRP,depleted in NES
	OTU_1665	NA	NA	-6.205	0.000378555	5.29198	0.0190864	enriched in NRP,depleted in NES
	OTU_866	1.877	0.52	-5.975	0.000984364	5.55142	0.0228543	enriched in NRP,depleted in NES
	OTU_82	0.019	0.95	-8.161	3.29944e-08	5.5607	0.000645359	enriched in NRP,depleted in NES
	OTU_962	0.929	NA	-6.749	0.000446177	5.84197	0.0191266	enriched in NRP,depleted in NES
	OTU_1039	2.087	0.315	-7.026	0.0238246	6.11634	0.0451384	enriched in NRP,depleted in NES
	OTU_658	1.668	0.233	-3.936	0.00413364	6.14226	0.0111999	enriched in NRP,depleted in NES
	OTU_895	2.385	0.419	-7.153	0.0231173	6.24323	0.0418805	enriched in NRP,depleted in NES
	OTU_316	1.417	0.396	-7.299	8.20153e-05	6.34958	0.00917155	enriched in NRP,depleted in NES
	OTU_520	2.606	0.108	-7.35	8.71913e-07	6.36219	0.000645359	enriched in NRP,depleted in NES
	OTU_625	NA	NA	-7.745	0.0197197	6.83584	0.029789	enriched in NRP,depleted in NES
	OTU_767	-2.139	0.342	-5.204	0.000234553	6.89329	0.00306566	enriched in NRP,depleted in NES
	OTU_484	-0.995	NA	-4.822	3.3449e-06	-3.30413	0.0249811	enriched in NRP,enriched in NES
	OTU_857	0	0	-3.902	0.00981247	-3.20824	0.0218315	enriched in NRP,enriched in NES
	OTU_3897	2.933	0.068	-3.429	0.0194636	-1.79284	0.029789	enriched in NRP,enriched in NES
	OTU_40	-0.255	0.552	-1.841	4.64394e-14	-1.53726	0.0152924	enriched in NRP,enriched in NES
	OTU_30	0.025	0.956	-0.931	0.000482303	-1.47947	0.0190864	enriched in NRP,enriched in NES
	OTU_79	0.194	0.736	-0.995	0.00196646	-1.40992	0.0281283	enriched in NRP,enriched in NES
	OTU_734	-3.477	0.038	1.302	0.330096	-1.74118	0.21248	enriched in NRS
	OTU_1519	-3.648	0.008	1.115	0.28527	-1.04246	0.515967	enriched in NRS
	OTU_25	-0.696	0.012	0.044	0.881758	-0.549513	0.181604	enriched in NRS
	OTU_1514	-1.995	0.048	-0.043	0.922702	-0.548087	0.551489	enriched in NRS
	OTU_1150	-3.58	0.01	-0.074	0.942615	-0.531665	0.667988	enriched in NRS
	OTU_922	-3.358	0.038	-0.909	0.330096	-0.280299	0.864673	enriched in NRS
	OTU_38	-0.616	0.016	0.264	0.262771	-0.20471	0.188507	enriched in NRS
	OTU_1580	-2.141	0.036	1.732	0.0820997	0.0371064	0.912354	enriched in NRS
	OTU_320	-1.007	0.045	1.124	0.0643552	0.047199	0.935093	enriched in NRS
	OTU_769	-1.535	0.018	-0.076	0.910553	0.106687	0.898257	enriched in NRS
	OTU_750	-0.833	0	-0.24	0.378757	0.276091	0.448084	enriched in NRS
	OTU_1453	-3.335	0.038	2.01	0.143086	0.320666	NA	enriched in NRS
	OTU_1233	-3.764	0.024	-0.595	0.558128	0.37181	0.814669	enriched in NRS
	OTU_3204	-0.962	0.048	0.544	0.278947	0.525578	0.58429	enriched in NRS
	OTU_703	-2.041	0.027	0.321	0.68972	0.602468	0.367266	enriched in NRS
	OTU_1323	-3.086	0.031	-0.976	0.26924	0.753525	0.58429	enriched in NRS
	OTU_5612	-1.477	0.048	-0.553	0.355972	1.29172	0.191776	enriched in NRS
	OTU_772	-1.394	0.035	0.89	0.161903	1.63583	0.151968	enriched in NRS
	OTU_1234	-4.498	0.001	-0.108	0.889031	1.76964	0.191776	enriched in NRS
	OTU_1431	-2.99	0.027	1.371	0.179441	2.40856	NA	enriched in NRS
	OTU_930	-3.612	0.034	-0.253	0.828044	2.82361	0.103626	enriched in NRS
	OTU_1067	-4.444	0.027	1.66	0.315092	3.10637	0.171605	enriched in NRS
	OTU_1311	-3.539	0.025	3.172	0.0266783	-2.57784	0.171605	enriched in NRS,depleted in NRP
	OTU_821	-5.275	0.007	3.946	0.0169453	-0.641127	NA	enriched in NRS,depleted in NRP
	OTU_714	-0.759	0.045	2.407	2.48424e-13	-0.533798	0.233836	enriched in NRS,depleted in NRP
	OTU_27	-0.635	0	0.922	2.73068e-09	-0.297149	0.063283	enriched in NRS,depleted in NRP
	OTU_305	-0.927	0.004	2.093	3.03093e-12	-0.264665	0.627557	enriched in NRS,depleted in NRP
	OTU_2492	-3.334	0.023	2.967	0.031096	-0.160227	NA	enriched in NRS,depleted in NRP
	OTU_360	-0.515	0.034	1.021	7.34529e-06	-0.112426	0.808649	enriched in NRS,depleted in NRP
	OTU_783	-0.891	0	1.734	7.2756e-12	-0.0259362	0.941157	enriched in NRS,depleted in NRP
	OTU_366	-0.949	0.029	0.84	0.000750352	0.056356	0.918726	enriched in NRS,depleted in NRP
	OTU_349	-1.165	0.007	1.762	1.47282e-05	0.141693	0.857284	enriched in NRS,depleted in NRP
	OTU_4839	-2.48	0.038	2.742	0.00307548	0.238443	0.800916	enriched in NRS,depleted in NRP
	OTU_289	-0.777	0.017	1.369	1.99301e-05	0.486029	0.34001	enriched in NRS,depleted in NRP
	OTU_1597	-1.465	1e-06	0.927	0.00379966	1.04539	0.072226	enriched in NRS,depleted in NRP
	OTU_1437	-3.166	0.001	2.247	0.013698	1.87968	0.537748	enriched in NRS,depleted in NRP
	OTU_1866	-3.687	0.015	3.33	0.0124375	NA	NA	enriched in NRS,depleted in NRP
	OTU_3202	-3.957	0.022	3.118	0.0381302	NA	NA	enriched in NRS,depleted in NRP
	OTU_1350	-3.866	0.03	3.028	0.0492676	NA	NA	enriched in NRS,depleted in NRP
	OTU_521	-2.774	0.031	4.91	0.00226298	-4.7105	0.000104474	enriched in NRS,depleted in NRP,enriched in NES
	OTU_1468	-2.746	0.007	4.047	0.000631213	-3.76253	0.0190864	enriched in NRS,depleted in NRP,enriched in NES
	OTU_3651	-0.658	0.005	-0.551	0.0204224	-0.525391	0.203774	enriched in NRS,enriched in NRP
	OTU_203	-3.807	0	-0.861	0.00064996	-0.518867	0.634313	enriched in NRS,enriched in NRP
	OTU_1	-0.676	0.006	-3.092	2.3445e-23	-0.299344	0.610568	enriched in NRS,enriched in NRP
	OTU_364	-1.311	0.046	-2.398	2.47649e-05	0.266278	0.784792	enriched in NRS,enriched in NRP
	OTU_4345	-0.494	0.031	-1.215	0.000748129	0.415989	0.392848	enriched in NRS,enriched in NRP
	OTU_1017	-3.566	0.022	-3.596	5.89002e-05	3.99967	0.00232656	enriched in NRS,enriched in NRP,depleted in NES
	Fungi
	OTUs_number	BS-RSlog2FC	BS-RSpadj	RS-RPlog2FC	RS-RPpadj	RP-ESlog2FC	RP-ESpadj	group
	OTU_100	-0.675713	0.541604	4.05657	8.66608e-05	-0.156369	0.901758	Depleted in NRP
	OTU_101	-2.64113	0.0120077	1.6232	0.0476504	-0.25381	0.781714	Enriched in NRS,Depleted in NRP
	OTU_1029	NA	NA	-4.02788	0.0278908	-0.0817319	0.977225	Enriched in NRP
	OTU_1037	-0.513412	0.688596	2.4623	0.00583833	0.486637	0.61238	Depleted in NRP
	OTU_104	-2.43889	0.15828	4.90176	0.00242261	-1.33277	0.266836	Depleted in NRP
	OTU_1052	0.433232	0.764011	4.41257	0.000467267	-3.86546	0.00952052	Depleted in NRP, Enriched in NES
	OTU_106	1.69195	0.0186425	2.08123	0.0119972	-1.72138	0.0451152	Depleted in NRS, Depleted in NRP, Enriched in NES
	OTU_107	0.349315	0.854382	-0.113681	0.922994	3.17079	0.01946	Depleted in NES
	OTU_1076	1.55743	NA	-6.47013	0.00493943	4.97972	0.0065213	Enriched in NRP, Depleted in NES
	OTU_1088	1.06979	0.501734	3.50529	0.0438403	-3.63794	0.0257158	Depleted in NRP, Enriched in NES
	OTU_109	-2.35421	0.157673	4.02788	0.00331131	-0.123147	0.953573	Depleted in NRP
	OTU_11	0.29466	0.84067	3.54489	1.25496e-05	0.054411	0.957531	Depleted in NRP
	OTU_1100	-0.0906257	0.853902	1.23066	2.7534e-05	-0.313062	0.534828	Depleted in NRP
	OTU_1108	-4.52031	0.0261218	5.09252	0.00493943	NA	NA	Enriched in NRS,Depleted in NRP
	OTU_111	-1.55075	0.143184	-5.22782	7.1869e-05	4.94306	0.000218591	Enriched in NRP, Depleted in NES
	OTU_112	-2.40303	0.000890411	2.88374	0.000466105	-0.938631	0.388176	Enriched in NRS,Depleted in NRP
	OTU_1127	0.954903	0.517056	3.74462	0.0350026	-2.93512	0.274795	Depleted in NRP
	OTU_113	0.471179	0.780668	-3.00813	0.00121144	-1.43268	0.169895	Enriched in NRP
	OTU_114	-0.867881	0.777206	5.44736	0.0107017	1.14557	0.662584	Depleted in NRP
	OTU_115	0.562979	0.155692	2.61194	0.000136904	-0.941424	0.291575	Depleted in NRP
	OTU_116	0.374855	0.31458	2.39006	0.000455459	-0.806868	0.282648	Depleted in NRP
	OTU_117	-1.24663	0.179714	-1.75318	0.00216489	1.62067	0.017353	Enriched in NRP, Depleted in NES
	OTU_1170	-4.35091	0.0277238	2.15484	0.138979	1.50964	0.546696	Enriched in NRS
	OTU_1188	-4.00653	0.0172106	2.01929	0.0466495	-0.0487813	0.984961	Enriched in NRS,Depleted in NRP
	OTU_1189	NA	NA	NA	NA	-4.90784	0.0100747	Enriched in NES
	OTU_12	0.00233474	0.97871	-8.84987	1.83593e-07	0.00499417	1	Enriched in NRP
	OTU_120	NA	NA	-4.81472	0.0297876	1.2489	0.589582	Enriched in NRP
	OTU_1213	0.15701	0.871301	-1.5196	0.0331151	0.348644	0.735863	Enriched in NRP
	OTU_122	-0.553676	0.607847	-2.23692	0.00450358	2.25575	0.0107704	Enriched in NRP, Depleted in NES
	OTU_1226	-1.42343	0.458531	4.02328	0.00642633	-0.7906	0.653339	Depleted in NRP
	OTU_123	2.29804	0.0100377	0.555002	0.135957	0.0526896	0.910834	Depleted in NRS
	OTU_1282	-1.33289	0.262873	4.89589	0.00403545	0.218583	NA	Depleted in NRP
	OTU_1287	NA	NA	-3.72752	0.0305605	4.5934	0.0215765	Enriched in NRP, Depleted in NES
	OTU_129	-2.68175	0.31182	-3.95479	0.00147178	-0.255461	0.897248	Enriched in NRP
	OTU_13	-0.427354	0.756015	-4.81021	0.000340684	1.71315	0.257866	Enriched in NRP
	OTU_130	0.352682	0.756015	-0.850125	0.265731	1.58795	0.0474978	Depleted in NES
	OTU_1300	NA	NA	-3.09292	0.0581996	3.95964	0.0406414	Depleted in NES
	OTU_1313	NA	NA	-2.98946	0.0221931	3.85711	0.0109016	Enriched in NRP, Depleted in NES
	OTU_1323	-2.85981	0.15828	4.37717	0.0216384	-3.245	0.0512996	Depleted in NRP
	OTU_134	1.00299	0.659574	-0.704248	0.720659	5.3858	0.0215765	Depleted in NES
	OTU_1348	4.11657	0.0430855	0.150518	NA	0.218578	1	Depleted in NRS
	OTU_1360	0.397494	NA	NA	NA	-4.47189	0.0257158	Enriched in NES
	OTU_1369	NA	NA	-3.67245	0.00301756	4.05901	0.00268436	Enriched in NRP, Depleted in NES
	OTU_1376	-2.22115	0.256143	3.74462	0.0350026	NA	NA	Depleted in NRP
	OTU_138	0.265149	0.871542	2.99184	0.00310345	-0.0347849	0.953573	Depleted in NRP
	OTU_139	0.902211	0.322698	-1.71474	0.0235321	-1.45431	0.162539	Enriched in NRP
	OTU_1390	-0.136288	0.90502	1.44331	0.0919038	1.91401	0.017353	Depleted in NES
	OTU_14	-0.0551195	0.939434	-1.69984	0.000163388	0.178821	0.881337	Enriched in NRP
	OTU_141	0.510762	0.328081	3.32848	1.18467e-27	0.944298	0.0406414	Depleted in NRP, Depleted in NES
	OTU_143	1.35747	0.203276	1.60685	0.0145182	-0.801094	0.293009	Depleted in NRP
	OTU_1447	-0.620742	0.756015	3.50529	0.0438403	NA	NA	Depleted in NRP
	OTU_145	0.829672	0.443969	1.79315	0.00989097	-0.0592417	0.910121	Depleted in NRP
	OTU_147	-0.501199	0.249221	1.76652	3.90695e-06	0.366526	0.520699	Depleted in NRP
	OTU_148	2.12564	0.00729443	0.926687	0.0812992	0.0111436	0.984961	Depleted in NRS
	OTU_1483	-2.82858	0.15828	-0.280661	0.79914	3.79102	0.0462759	Depleted in NES
	OTU_149	-0.776867	0.15828	-1.40704	1.61852e-08	1.88498	0.000330316	Enriched in NRP, Depleted in NES
	OTU_1509	-4.51133	0.0552096	5.00519	0.0132723	NA	NA	Depleted in NRP
	OTU_151	4.85177	0.000890411	-0.53252	0.628676	-2.83293	1.85425e-05	Depleted in NRS, Enriched in NES
	OTU_1519	NA	NA	-2.83639	0.0466495	1.25843	0.353999	Enriched in NRP
	OTU_153	0.795145	0.688596	-3.43055	0.0050191	1.88727	0.134631	Enriched in NRP
	OTU_155	0.875401	0.658552	5.57439	0.00108033	-1.2241	0.826279	Depleted in NRP
	OTU_16	0.157211	0.702908	-1.80887	3.78771e-13	-0.0211195	0.977035	Enriched in NRP
	OTU_161	-1.1404	0.000772331	0.105764	0.763325	-0.200238	0.76291	Enriched in NRS
	OTU_1627	-0.980914	0.304843	4.15713	6.24145e-06	0.706038	0.46618	Depleted in NRP
	OTU_165	-1.0504	0.435454	-0.656238	0.544414	-3.49957	0.0394568	Enriched in NES
	OTU_167	-3.43946	0.0118029	3.57445	0.00403545	0.0962594	0.953795	Enriched in NRS,Depleted in NRP
	OTU_17	-1.17698	0.66057	5.92944	0.00583833	0.192418	0.956581	Depleted in NRP
	OTU_170	0.723965	0.58081	3.80956	0.000163388	-2.62511	0.0678564	Depleted in NRP
	OTU_1700	0.315896	0.894913	-8.5466	5.09269e-05	-0.00596936	1	Enriched in NRP
	OTU_171	-2.82961	0.00729443	1.8934	0.0172008	-1.68035	0.000673565	Enriched in NRS,Depleted in NRP, Enriched in NES
	OTU_172	-8.32921	0.0001556	10.0932	2.16506e-05	-1.6734	0.385935	Enriched in NRS,Depleted in NRP
	OTU_1723	0.894355	0.302182	-1.13868	0.101534	2.10344	0.00809263	Depleted in NES
	OTU_179	0.301279	0.854382	5.6805	8.86135e-05	-3.46071	0.0518377	Depleted in NRP
	OTU_1794	0.164949	0.905499	-8.74141	1.95721e-06	0.0401285	0.986157	Enriched in NRP
	OTU_180	0.0378525	0.939434	-0.862301	0.00679689	-0.367407	0.639496	Enriched in NRP
	OTU_182	6.27903	0.00036378	-1.54297	0.312976	-2.3489	0.0249143	Depleted in NRS, Enriched in NES
	OTU_183	1.94071	0.273328	3.14754	0.0276325	-2.16686	0.0864296	Depleted in NRP
	OTU_184	0.330267	0.785766	-2.22553	0.00493943	-0.688151	0.494999	Enriched in NRP
	OTU_185	4.09759	0.0144209	-4.92628	0.00169498	2.21059	0.154695	Depleted in NRS, Enriched in NRP
	OTU_186	0.158169	0.899346	-3.33483	0.00111336	4.56898	1.26326e-05	Enriched in NRP, Depleted in NES
	OTU_188	-1.99073	0.145367	4.29217	0.000455088	0.633499	0.694584	Depleted in NRP
	OTU_1886	1.65382	0.379528	3.10162	0.0433107	-3.67252	0.0284623	Depleted in NRP, Enriched in NES
	OTU_1890	-2.68022	0.138705	4.1829	0.00575077	-2.22962	0.410993	Depleted in NRP
	OTU_19	0.795008	0.48143	-2.18692	0.0129037	-1.32463	0.279451	Enriched in NRP
	OTU_192	1.29213	0.0726935	-1.23688	0.0238695	-0.936026	0.0681856	Enriched in NRP
	OTU_193	1.78625	0.0662852	0.864211	0.142042	-2.50121	0.000484268	Enriched in NES
	OTU_194	-0.204046	0.894913	-3.42179	0.00178455	1.60618	0.165296	Enriched in NRP
	OTU_195	-1.60178	0.228128	4.51552	0.000953081	-1.2241	0.826279	Depleted in NRP
	OTU_196	2.08335	0.328659	4.26274	0.0276325	NA	NA	Depleted in NRP
	OTU_198	-3.00907	0.0277238	0.933947	0.314139	0.334194	0.800508	Enriched in NRS
	OTU_1982	1.4418	NA	-7.31534	0.000894839	0.0795676	0.981108	Enriched in NRP
	OTU_199	-1.93132	0.0415978	1.03401	0.108823	0.984879	0.300163	Enriched in NRS
	OTU_2	-3.31808	0.0858828	8.87649	2.17894e-06	-0.155119	0.925391	Depleted in NRP
	OTU_20	-2.43205	0.0162699	4.15283	0.000306541	-0.0294024	0.983884	Enriched in NRS,Depleted in NRP
	OTU_201	1.19488	0.328081	1.8076	0.0200025	-0.696545	0.494999	Depleted in NRP
	OTU_203	0.366243	0.88816	3.49721	0.0312905	-0.0257252	0.980151	Depleted in NRP
	OTU_205	0.545733	0.720997	6.14888	2.22786e-06	-0.743202	NA	Depleted in NRP
	OTU_2050	-0.804578	0.658552	0.379401	0.774476	-2.22559	0.0406414	Enriched in NES
	OTU_206	-3.63568	0.00729443	4.08689	0.00219341	0.426677	0.692871	Enriched in NRS,Depleted in NRP
	OTU_2077	3.65783	0.00729443	1.1123	NA	-2.14571	0.294918	Depleted in NRS
	OTU_208	0.77505	0.388789	-1.76386	0.0214667	-1.06428	0.413642	Enriched in NRP
	OTU_21	-1.36252	0.516691	4.57777	0.00144833	0.150379	0.934154	Depleted in NRP
	OTU_210	1.1913	0.183806	-1.40604	0.016711	0.416439	0.529261	Enriched in NRP
	OTU_212	3.68269	0.0353376	-0.0473369	0.931739	-1.78411	0.0269727	Depleted in NRS, Enriched in NES
	OTU_2126	NA	NA	-3.65072	0.00576433	0.905816	0.36506	Enriched in NRP
	OTU_213	0.760466	0.592846	-2.43028	0.000254032	1.64103	0.0530536	Enriched in NRP
	OTU_214	-2.39678	0.0120077	3.65694	0.000720322	-1.56828	0.0778186	Enriched in NRS,Depleted in NRP
	OTU_215	0.213141	0.871542	3.28029	2.60106e-06	-3.64217	1.24827e-07	Depleted in NRP, Enriched in NES
	OTU_216	0.225765	0.765768	-1.81215	0.00581484	-0.251496	0.831292	Enriched in NRP
	OTU_218	0.194594	0.863848	1.21325	0.0235321	0.215461	0.686993	Depleted in NRP
	OTU_2187	3.8839	0.0277238	-0.35813	0.83179	1.67191	0.546696	Depleted in NRS
	OTU_220	0.327404	0.740737	-1.6593	0.113341	2.50948	0.0492376	Depleted in NES
	OTU_2205	NA	NA	-7.91677	0.000550314	0.149756	0.970406	Enriched in NRP
	OTU_221	-0.422546	0.621325	-1.84011	0.000167251	1.11876	0.0834747	Enriched in NRP
	OTU_222	-0.81139	0.269776	1.31375	0.0172869	-0.644109	0.43944	Depleted in NRP
	OTU_223	-0.384954	0.663159	1.25079	0.0339305	-1.46166	0.00208959	Depleted in NRP, Enriched in NES
	OTU_2235	0.704028	0.66057	-0.176886	0.856613	3.44429	0.0215765	Depleted in NES
	OTU_224	-3.01423	0.0208741	4.96342	0.000303065	0.699474	NA	Enriched in NRS,Depleted in NRP
	OTU_225	1.7164	NA	-4.31509	0.0050191	5.1775	0.00281231	Enriched in NRP, Depleted in NES
	OTU_227	1.75095	0.0120077	0.184707	0.74407	-0.583229	0.364139	Depleted in NRS
	OTU_229	-0.938253	0.733805	5.55571	0.00458217	0.226137	0.944155	Depleted in NRP
	OTU_2293	1.00216	0.301594	-2.68593	0.00849595	0.36494	0.866021	Enriched in NRP
	OTU_230	0.956858	0.225597	3.36173	3.28041e-05	-1.41191	0.191907	Depleted in NRP
	OTU_232	-0.769895	0.517056	-2.86306	1.70586e-06	0.425327	0.712536	Enriched in NRP
	OTU_234	NA	NA	-7.95353	3.32671e-05	0.690199	0.736486	Enriched in NRP
	OTU_237	-3.63809	0.0164624	6.72638	0.000219333	-1.89985	0.399262	Enriched in NRS,Depleted in NRP
	OTU_238	-6.96113	0.000890411	4.13208	0.023748	1.13432	0.644251	Enriched in NRS,Depleted in NRP
	OTU_2393	-1.22618	0.633937	6.14037	0.00642633	NA	NA	Depleted in NRP
	OTU_24	0.298537	0.688596	-1.45829	3.95143e-05	-1.35107	0.0513933	Enriched in NRP
	OTU_240	-1.36475	0.15828	3.01957	0.00111336	0.659488	0.343502	Depleted in NRP
	OTU_241	0.230109	0.866187	3.07795	0.00197271	1.96709	0.322088	Depleted in NRP
	OTU_244	3.48284	0.0162012	0.946539	0.475954	0.245924	0.927873	Depleted in NRS
	OTU_250	-0.233209	0.740737	0.884326	0.0273	-0.625695	0.211867	Depleted in NRP
	OTU_253	0.266591	0.785766	0.810789	0.0387659	-0.335913	0.653339	Depleted in NRP
	OTU_254	-0.311806	0.8052	4.47067	5.03195e-05	-3.67074	0.0159668	Depleted in NRP, Enriched in NES
	OTU_2555	NA	NA	-3.67245	0.00301756	1.54369	0.113864	Enriched in NRP
	OTU_256	-0.09909	0.910538	3.14942	0.0132723	-1.71579	0.233721	Depleted in NRP
	OTU_2567	-4.05355	0.0490892	1.3334	0.183715	-0.667612	0.547765	Enriched in NRS
	OTU_257	2.85226	0.0171472	1.6375	0.0275816	-1.035	0.229897	Depleted in NRS, Depleted in NRP
	OTU_258	2.24319	0.0238776	-1.03008	0.264393	0.659996	0.452547	Depleted in NRS
	OTU_2599	0.117694	0.90845	3.58131	0.0213898	NA	NA	Depleted in NRP
	OTU_260	-3.17278	0.155474	1.37905	0.385872	-5.36376	0.017353	Enriched in NES
	OTU_261	-1.74499	0.266199	4.55191	0.00108838	NA	NA	Depleted in NRP
	OTU_2614	NA	NA	NA	NA	-3.40984	0.0406345	Enriched in NES
	OTU_264	-0.083397	NA	-5.14654	0.0237672	3.72429	0.078552	Enriched in NRP
	OTU_265	-0.311533	0.6814	1.52909	0.0044225	-0.466656	0.488644	Depleted in NRP
	OTU_266	1.59108e-05	0.978152	-5.19449	4.31465e-05	4.70545	0.000976063	Enriched in NRP, Depleted in NES
	OTU_2670	0.596318	0.733805	-4.83471	0.00176718	-0.540024	0.872125	Enriched in NRP
	OTU_268	1.5829	NA	-4.57106	0.00144833	1.42378	0.158509	Enriched in NRP
	OTU_27	0.0214022	0.95704	-1.1173	0.0179882	0.157718	0.894964	Enriched in NRP
	OTU_271	-2.21828	0.0698601	2.53666	0.00866391	-2.34424	0.0406345	Depleted in NRP, Enriched in NES
	OTU_273	-1.04518	NA	-3.7128	0.00584978	1.34854	0.143136	Enriched in NRP
	OTU_275	4.40805	0.0211154	-2.79483	0.133636	3.57636	0.112285	Depleted in NRS
	OTU_2766	-0.00140231	0.974833	1.43632	0.221567	-3.19989	0.00651545	Enriched in NES
	OTU_278	-0.819797	0.66057	-3.9497	0.000550314	0.608655	0.719145	Enriched in NRP
	OTU_279	1.5829	NA	-1.09498	0.412809	-3.15687	0.013653	Enriched in NES
	OTU_28	-3.0361	0.169457	6.76138	0.00118738	0.260066	0.908688	Depleted in NRP
	OTU_281	-0.22466	0.845248	-0.577733	0.311453	-1.9379	0.0112504	Enriched in NES
	OTU_284	-0.0246222	0.927392	-0.147647	0.79914	-1.21073	0.0173321	Enriched in NES
	OTU_285	-4.29922	0.00729443	5.82928	0.000254032	-1.2241	0.826279	Enriched in NRS,Depleted in NRP
	OTU_287	-0.999597	0.612708	-0.382774	0.75962	-2.70838	0.0100747	Enriched in NES
	OTU_288	-1.81819	0.169457	4.03064	0.00147178	0.345064	0.791999	Depleted in NRP
	OTU_289	-0.476644	0.474876	1.34702	0.0229273	-0.631133	0.415018	Depleted in NRP
	OTU_29	-0.0680465	0.939434	2.57406	0.0102634	-0.19901	0.908688	Depleted in NRP
	OTU_290	-0.804916	0.15828	1.09427	0.0302504	-0.420242	0.490831	Depleted in NRP
	OTU_291	3.40486	0.0209278	-5.47443	3.33664e-06	1.77197	0.117071	Depleted in NRS, Enriched in NRP
	OTU_292	-1.13857	0.568499	2.66288	0.0474808	-0.42572	0.894964	Depleted in NRP
	OTU_293	-0.841648	0.501734	-0.959558	0.244028	2.77647	0.00106036	Depleted in NES
	OTU_296	-0.147376	0.894296	-3.12026	0.0168294	0.161112	0.957531	Enriched in NRP
	OTU_297	0.13802	0.90502	2.49141	0.00925231	2.16666	0.274795	Depleted in NRP
	OTU_298	2.05926	0.0713444	1.58403	0.00575077	0.549739	0.565038	Depleted in NRP
	OTU_30	-0.775745	0.421315	2.92651	0.000297842	0.151763	0.908688	Depleted in NRP
	OTU_300	-0.379781	0.774482	-1.1524	0.0550461	2.78846	0.00170377	Depleted in NES
	OTU_302	1.92657	NA	-6.04531	1.74609e-08	-0.593896	0.697587	Enriched in NRP
	OTU_304	-2.55121	0.0277238	2.11095	0.024419	-0.399111	0.671582	Enriched in NRS,Depleted in NRP
	OTU_31	1.65817	0.203276	-0.355568	0.756081	-6.48914	1.89134e-07	Enriched in NES
	OTU_310	-4.38121	0.0334044	5.46239	0.000598999	-2.11188	0.207657	Enriched in NRS,Depleted in NRP
	OTU_313	-5.73575	0.00036378	6.14024	0.000116357	0.344701	0.846547	Enriched in NRS,Depleted in NRP
	OTU_319	-0.0922042	0.894913	-1.02091	0.0214667	1.52896	0.00476485	Enriched in NRP, Depleted in NES
	OTU_32	-1.44091	0.0277238	0.945694	0.0585221	-2.7794	0.000218591	Enriched in NRS, Enriched in NES
	OTU_325	-1.80229	0.157248	3.03152	0.000412922	0.785539	0.554428	Depleted in NRP
	OTU_329	-0.0701551	0.922794	-2.86213	0.0474808	-0.109452	0.971157	Enriched in NRP
	OTU_330	0.187586	0.929422	6.07482	0.000614233	-0.594712	0.867252	Depleted in NRP
	OTU_332	-1.60883	0.249221	4.60682	0.00214509	NA	NA	Depleted in NRP
	OTU_333	1.83015	NA	-3.14261	0.0135581	1.39221	0.191831	Enriched in NRP
	OTU_334	0.206781	0.83609	1.64999	0.0100628	0.461229	0.517283	Depleted in NRP
	OTU_335	-7.18467	0.00594596	7.76271	0.00108838	NA	NA	Enriched in NRS,Depleted in NRP
	OTU_337	0.915302	0.214048	2.06878	0.00111336	0.126909	0.927873	Depleted in NRP
	OTU_34	-0.524556	0.516691	4.15571	3.68601e-06	-0.148389	0.908688	Depleted in NRP
	OTU_340	4.81208	0.000424926	-2.18011	0.0923493	-0.910156	0.406257	Depleted in NRS
	OTU_341	1.90706	0.0261218	1.70947	0.0466495	-0.140184	0.894964	Depleted in NRS, Depleted in NRP
	OTU_343	0.00099857	0.987078	3.99755	0.010637	2.28774	0.428367	Depleted in NRP
	OTU_345	-0.083397	NA	-5.34554	0.000559267	-0.81802	0.646325	Enriched in NRP
	OTU_347	-0.0834039	NA	-1.901	0.126452	3.23141	0.0236515	Depleted in NES
	OTU_349	-0.271882	0.804835	1.84182	0.0107775	0.639694	0.29441	Depleted in NRP
	OTU_35	-1.40779	0.0644573	1.06579	0.0474808	1.40747	4.74595e-06	Depleted in NRP, Depleted in NES
	OTU_350	1.4786	0.474876	-1.54354	0.279204	4.64351	0.00809263	Depleted in NES
	OTU_356	-1.16187	0.458531	-2.65644	0.0445233	3.94333	0.0167829	Enriched in NRP, Depleted in NES
	OTU_357	-3.35602	0.0171472	3.28026	0.00675768	1.38448	0.145775	Enriched in NRS,Depleted in NRP
	OTU_359	-0.184549	0.8052	1.01073	0.0460985	1.30218	0.068039	Depleted in NRP
	OTU_362	-2.74527	0.138705	-1.82351	0.0273	2.06892	0.0283979	Enriched in NRP, Depleted in NES
	OTU_363	-2.94189	0.169457	-1.91349	0.0391178	2.98891	0.010725	Enriched in NRP, Depleted in NES
	OTU_364	-2.08791	0.06007	0.176629	0.802247	4.5704	0.000673565	Depleted in NES
	OTU_368	-0.416827	0.655057	-1.14965	0.0172958	-0.0214085	0.977508	Enriched in NRP
	OTU_372	0.573106	0.71386	-0.731007	0.4295	-2.14384	0.0400628	Enriched in NES
	OTU_376	-0.234696	0.871542	2.7135	0.00819083	1.96709	0.322088	Depleted in NRP
	OTU_379	0.586515	0.665433	5.02303	2.60106e-06	-2.59727	0.327623	Depleted in NRP
	OTU_38	-0.249965	0.624649	-1.12756	0.007027	0.208846	0.812831	Enriched in NRP
	OTU_384	-3.47801	0.0573901	3.68945	0.0221931	1.62255	0.482249	Depleted in NRP
	OTU_385	-0.688555	0.6814	3.7699	0.00509005	-3.31347	0.00892639	Depleted in NRP, Enriched in NES
	OTU_386	-0.176833	0.894296	2.04996	0.015141	2.61476	0.113864	Depleted in NRP
	OTU_387	1.58454	0.155474	-2.78676	0.0122274	-0.376688	0.837337	Enriched in NRP
	OTU_388	1.55225	0.200851	-2.70452	0.0120392	-0.132096	0.954784	Enriched in NRP
	OTU_394	5.35181	0.0364091	-1.09498	0.412809	1.96709	0.322088	Depleted in NRS
	OTU_395	-2.73014	0.0238776	0.960173	0.227806	0.895287	0.534828	Enriched in NRS
	OTU_396	0.243186	0.894913	0.18776	0.861556	-2.50514	0.0181305	Enriched in NES
	OTU_397	-0.324153	0.6814	0.678207	0.235538	1.57368	0.0283979	Depleted in NES
	OTU_398	1.38903	0.374138	-3.51339	0.000680534	0.719844	0.385419	Enriched in NRP
	OTU_399	-6.29474	0.00731615	6.87131	0.00144833	NA	NA	Enriched in NRS,Depleted in NRP
	OTU_4	0.018727	0.978152	3.04416	2.92493e-24	0.706759	0.0339734	Depleted in NRP, Depleted in NES
	OTU_40	3.56834	0.0269535	0.573108	0.548947	-0.345461	0.826279	Depleted in NRS
	OTU_403	-0.485522	0.785766	2.2979	0.0856731	-2.82219	0.0400628	Enriched in NES
	OTU_406	-1.2741	0.0989425	1.47827	0.00911357	-0.75022	0.257866	Depleted in NRP
	OTU_407	-2.00629	0.0210318	-0.140404	0.850746	-0.432696	0.581054	Enriched in NRS
	OTU_408	1.25909	0.593138	4.35775	0.00317911	-3.22828	0.129817	Depleted in NRP
	OTU_409	1.13122	0.624649	5.91819	0.00575077	NA	NA	Depleted in NRP
	OTU_41	0.735271	0.307979	-1.69058	0.0120019	-0.770501	0.514807	Enriched in NRP
	OTU_411	-0.262069	0.78192	1.94957	0.00111336	0.564743	0.318832	Depleted in NRP
	OTU_415	2.53589	0.00729443	0.6268	0.549465	-1.64713	0.0603604	Depleted in NRS
	OTU_417	-0.705261	0.449821	5.52568	9.37436e-07	NA	NA	Depleted in NRP
	OTU_420	-1.17687	0.432704	4.92113	0.00529767	NA	NA	Depleted in NRP
	OTU_421	0.420558	0.792043	2.34795	0.0410932	-2.76345	0.017353	Depleted in NRP, Enriched in NES
	OTU_423	-0.949831	0.592846	4.39305	0.00772482	NA	NA	Depleted in NRP
	OTU_425	-3.5384	0.0415978	0.687278	0.593083	2.65016	0.23593	Enriched in NRS
	OTU_427	-5.96912	0.0194003	3.07709	0.0235665	2.63866	0.0991803	Enriched in NRS,Depleted in NRP
	OTU_428	-1.41444	0.594326	-3.27277	0.00420384	1.39271	0.138514	Enriched in NRP
	OTU_43	-1.55781	0.15828	-2.23416	0.0222608	-0.220207	0.921638	Enriched in NRP
	OTU_432	-1.99347	0.321858	3.50529	0.0438403	NA	NA	Depleted in NRP
	OTU_435	-1.2779	0.251631	5.64555	0.000371784	-3.63578	0.00733721	Depleted in NRP, Enriched in NES
	OTU_436	0.228536	0.871542	-2.43948	0.0292735	1.2157	0.27024	Enriched in NRP
	OTU_438	-5.62824	0.0120077	6.20327	0.00191729	NA	NA	Enriched in NRS,Depleted in NRP
	OTU_441	0.431901	0.792043	3.83706	0.00292294	-2.48329	0.146881	Depleted in NRP
	OTU_442	4.17115	0.0172106	-3.08924	0.0139782	0.415107	0.673033	Depleted in NRS, Enriched in NRP
	OTU_446	-2.91321	0.12885	7.05146	0.000371784	-3.44018	0.124808	Depleted in NRP
	OTU_447	0.0448164	0.950254	4.12862	0.000894839	-1.76301	0.332936	Depleted in NRP
	OTU_449	-0.446392	0.713872	2.01452	0.0199	1.74156	0.196978	Depleted in NRP
	OTU_45	0.255368	0.764011	-4.05989	1.74609e-08	0.314824	0.781714	Enriched in NRP
	OTU_450	-2.94189	0.169457	-2.86361	0.0428668	6.12049	0.00941491	Enriched in NRP, Depleted in NES
	OTU_452	0.607531	0.66057	1.97462	0.0101909	-0.900074	0.336912	Depleted in NRP
	OTU_455	-1.72488	0.160433	-0.417442	0.728322	4.59253	0.00651545	Depleted in NES
	OTU_456	-0.812648	0.541604	-0.373207	0.585074	2.49402	0.0215765	Depleted in NES
	OTU_460	-2.70214	0.15828	-0.674441	0.447008	3.20922	0.00865575	Depleted in NES
	OTU_461	NA	NA	-4.55179	1.25496e-05	-1.01667	0.318832	Enriched in NRP
	OTU_462	-0.756697	0.688596	4.90588	0.000455459	-4.2219	0.0662023	Depleted in NRP
	OTU_465	-4.18313	0.0209278	6.64768	0.00161675	NA	NA	Enriched in NRS,Depleted in NRP
	OTU_471	-1.04518	NA	-4.88747	0.000704479	6.22309	0.000218591	Enriched in NRP, Depleted in NES
	OTU_478	0.202436	0.894296	-2.37047	0.0362553	2.11893	0.103371	Enriched in NRP
	OTU_48	0.076446	0.964898	6.47101	0.000231591	-2.01099	0.193995	Depleted in NRP
	OTU_481	0.811895	0.531368	-1.74391	0.00335701	0.372012	0.452212	Enriched in NRP
	OTU_484	-3.81355	0.06007	-1.81441	0.0302946	1.04798	0.269349	Enriched in NRP
	OTU_489	-4.35091	0.0277238	-1.32928	0.425954	4.09526	0.0691993	Enriched in NRS
	OTU_49	-0.401647	0.890631	5.54845	0.00310404	-0.312703	0.917591	Depleted in NRP
	OTU_490	2.21396	0.000969193	1.41393	0.0456794	-0.489808	0.653339	Depleted in NRS, Depleted in NRP
	OTU_492	-2.94189	0.169457	3.50529	0.0438403	NA	NA	Depleted in NRP
	OTU_494	1.90989	NA	-3.16674	0.00819083	3.55159	0.00936787	Enriched in NRP, Depleted in NES
	OTU_498	1.31809	0.461657	-1.99578	0.141447	4.66092	0.0215765	Depleted in NES
	OTU_5	-0.730426	0.774482	5.32918	0.0047288	0.43249	0.882207	Depleted in NRP
	OTU_504	0.320978	0.883455	2.87755	0.0410932	-0.978847	0.695651	Depleted in NRP
	OTU_505	-0.699794	0.379528	2.07949	0.00201265	1.62531	0.0930949	Depleted in NRP
	OTU_506	-1.57811	0.432276	4.67249	0.00359538	-1.4084	0.546696	Depleted in NRP
	OTU_507	-0.0350646	0.954448	-1.63056	0.016507	-0.139681	0.882207	Enriched in NRP
	OTU_509	-2.22421	0.214048	2.75199	0.0504704	-3.0003	0.00453803	Enriched in NES
	OTU_510	-0.545562	0.812726	5.11355	0.0131698	-5.26762	0.0350678	Depleted in NRP, Enriched in NES
	OTU_512	0.42397	0.737955	4.05434	0.00118738	-2.37461	0.250228	Depleted in NRP
	OTU_517	1.32278	0.655057	-4.02023	0.007027	5.35857	0.00246213	Enriched in NRP, Depleted in NES
	OTU_520	-0.828016	0.31458	1.41955	0.044466	-0.122699	0.908688	Depleted in NRP
	OTU_521	-3.27196	0.15828	4.26274	0.0276325	NA	NA	Depleted in NRP
	OTU_525	-1.27116	0.501734	2.7224	0.0132682	-0.147374	0.917591	Depleted in NRP
	OTU_526	2.56598	0.191	-4.13981	0.000148062	1.073	0.320628	Enriched in NRP
	OTU_53	0.276023	0.696812	-1.45029	0.000340304	-1.07754	0.000572059	Enriched in NRP, Enriched in NES
	OTU_532	0.0529936	0.964652	4.51552	0.000953081	-0.743202	NA	Depleted in NRP
	OTU_533	-2.50776	0.0227582	0.554889	0.430373	-1.82286	0.0723712	Enriched in NRS
	OTU_534	0.00686202	0.910538	3.63445	0.00571647	-1.6734	0.385935	Depleted in NRP
	OTU_535	-0.832793	0.650684	3.83856	0.0154643	NA	NA	Depleted in NRP
	OTU_536	1.71972	NA	-3.09292	0.0581996	3.95964	0.0406414	Depleted in NES
	OTU_537	1.71972	NA	-4.20845	0.000167251	0.667767	0.407773	Enriched in NRP
	OTU_538	0.0355699	0.964898	-1.96202	0.0438403	0.31522	0.736486	Enriched in NRP
	OTU_54	-1.6345	0.31182	4.98023	0.000363364	0.297041	0.882207	Depleted in NRP
	OTU_541	1.5864	0.143184	0.215492	0.802247	3.28394	0.0215765	Depleted in NES
	OTU_543	-4.92086	0.00036378	1.40085	0.0344833	0.36302	0.781714	Enriched in NRS,Depleted in NRP
	OTU_544	NA	NA	-6.77827	0.00165861	-0.140438	0.971157	Enriched in NRP
	OTU_545	-0.616387	0.716604	2.24693	0.101392	-3.08982	0.0400628	Enriched in NES
	OTU_546	1.16399	0.493392	2.55372	0.0904661	-4.85625	1.24827e-07	Enriched in NES
	OTU_55	0.949045	0.303501	-1.18767	0.00450358	0.163099	0.748512	Enriched in NRP
	OTU_555	-0.648137	0.737955	-0.0453983	0.953112	3.30609	0.028541	Depleted in NES
	OTU_559	0.60476	0.781428	-3.12944	0.0130943	0.252578	0.865474	Enriched in NRP
	OTU_56	-1.0094	0.318806	-2.21274	0.00840225	0.364114	0.796352	Enriched in NRP
	OTU_564	-0.719379	0.621325	2.21691	0.00296867	-0.390053	0.770847	Depleted in NRP
	OTU_567	-4.06143	0.0858828	4.06745	0.0350026	-3.0125	0.114697	Depleted in NRP
	OTU_576	-0.713393	0.66057	5.64665	0.000550314	-0.743202	NA	Depleted in NRP
	OTU_578	0.266021	0.90502	3.91851	0.0874091	-5.26762	0.0350678	Enriched in NES
	OTU_579	NA	NA	-5.68437	0.0200025	2.66349	0.229077	Enriched in NRP
	OTU_58	1.11986	0.15828	-0.895629	0.0354442	-0.0325482	0.981108	Enriched in NRP
	OTU_584	4.97115	0.0457576	NA	NA	-2.87256	0.0995751	Depleted in NRS
	OTU_588	3.40399	0.0811045	1.5932	NA	-4.02035	0.0406414	Enriched in NES
	OTU_589	2.35899	0.213017	-2.92863	0.0235321	-0.389954	0.782789	Enriched in NRP
	OTU_590	1.32091	0.66057	-3.95912	0.00224516	1.26644	0.260512	Enriched in NRP
	OTU_591	3.65676	0.00126345	-1.2231	0.332884	-0.22534	0.889493	Depleted in NRS
	OTU_593	4.22277	0.0395248	-1.71086	0.249588	-0.191227	0.917591	Depleted in NRS
	OTU_595	NA	NA	-4.59278	2.05224e-06	-1.62341	0.0726415	Enriched in NRP
	OTU_596	-2.82283	0.0989425	4.32996	0.00331283	NA	NA	Depleted in NRP
	OTU_597	-1.07107	0.516691	4.1829	0.00575077	NA	NA	Depleted in NRP
	OTU_598	1.69395	0.0171472	0.932995	0.223942	-0.665761	0.452964	Depleted in NRS
	OTU_599	NA	NA	-4.32386	0.0485427	0.36359	0.915073	Enriched in NRP
	OTU_6	-0.298237	0.429069	1.54	9.72366e-06	0.0697251	0.901758	Depleted in NRP
	OTU_600	NA	NA	-4.17853	0.0485427	4.9473	0.0462759	Enriched in NRP, Depleted in NES
	OTU_602	2.32393	0.0162699	3.52427	0.0219191	-2.61078	0.337567	Depleted in NRS, Depleted in NRP
	OTU_603	NA	NA	-6.61344	0.00161675	0.0697651	0.981317	Enriched in NRP
	OTU_606	4.26131	0.000890411	1.1123	NA	-1.72631	0.522972	Depleted in NRS
	OTU_607	NA	NA	NA	NA	-4.65957	0.0241551	Enriched in NES
	OTU_61	-0.0193263	0.978526	2.09983	0.045882	-0.0160695	0.992299	Depleted in NRP
	OTU_613	3.80277	0.0162012	-0.827877	0.524034	0.257459	0.882207	Depleted in NRS
	OTU_623	NA	NA	-3.4792	0.00575077	0.538055	0.655294	Enriched in NRP
	OTU_625	NA	NA	-5.42375	0.00557213	-0.288626	0.917591	Enriched in NRP
	OTU_63	1.47013	0.15828	2.62342	1.42734e-05	0.00843866	0.984961	Depleted in NRP
	OTU_631	-1.87037	0.135607	1.94968	0.0233669	0.550439	0.643874	Depleted in NRP
	OTU_635	-2.62487	0.218343	5.45927	0.0119021	-0.743202	NA	Depleted in NRP
	OTU_64	0.153426	0.944813	8.01134	4.49912e-06	-5.19075	0.0179844	Depleted in NRP, Enriched in NES
	OTU_646	3.27577	0.0174136	1.5932	NA	NA	NA	Depleted in NRS
	OTU_65	-0.611331	0.251631	-1.45897	0.00679689	-0.0394085	0.977508	Enriched in NRP
	OTU_653	3.48103	0.0172106	-0.892537	0.648335	-1.51559	0.401748	Depleted in NRS
	OTU_655	NA	NA	-7.28724	0.00104517	0.0281176	0.992299	Enriched in NRP
	OTU_658	NA	NA	0.150518	NA	-4.54063	0.0122558	Enriched in NES
	OTU_663	-1.62208	0.388789	4.92113	0.00529767	NA	NA	Depleted in NRP
	OTU_664	-0.153776	0.90845	2.18288	0.0219262	-1.06859	0.333043	Depleted in NRP
	OTU_666	1.32278	0.655057	-3.52435	0.00679689	-0.364563	0.826279	Enriched in NRP
	OTU_669	NA	NA	-3.8117	0.00264929	4.66175	0.000673565	Enriched in NRP, Depleted in NES
	OTU_67	2.42035	0.203276	-5.4222	0.000120123	1.95763	0.0530536	Enriched in NRP
	OTU_672	1.4418	NA	NA	NA	-4.47189	0.0257158	Enriched in NES
	OTU_68	-1.4227	0.650684	6.28166	0.0050191	0.396728	0.910121	Depleted in NRP
	OTU_680	NA	NA	NA	NA	-4.94106	0.0401129	Enriched in NES
	OTU_682	-1.04518	NA	-4.58017	0.000363364	3.53681	0.000845078	Enriched in NRP, Depleted in NES
	OTU_684	-0.660022	0.780166	3.50529	0.0438403	-4.2219	0.0662023	Depleted in NRP
	OTU_687	NA	NA	-4.15802	0.0216384	5.02406	0.017353	Enriched in NRP, Depleted in NES
	OTU_688	-2.2247	0.214048	2.78595	0.0438403	0.699474	NA	Depleted in NRP
	OTU_69	2.87261	0.030141	-2.19937	0.0970271	-5.59541	0.0100747	Depleted in NRS, Enriched in NES
	OTU_693	-0.083397	NA	-3.67427	0.00169498	0.350915	0.751743	Enriched in NRP
	OTU_694	0.397494	NA	-2.82818	0.030227	-0.212118	0.89226	Enriched in NRP
	OTU_696	-0.392302	0.845248	3.90285	0.0157606	-3.39083	0.149537	Depleted in NRP
	OTU_7	-0.382112	0.727266	-2.08134	0.000524942	-0.0595353	0.954784	Enriched in NRP
	OTU_70	-0.208946	0.722508	1.05726	0.00764603	0.814211	0.154026	Depleted in NRP
	OTU_701	0.793622	0.722508	-2.43143	0.0390473	3.2822	0.0112504	Enriched in NRP, Depleted in NES
	OTU_705	1.25771	NA	-2.88296	0.0669673	4.21794	0.0315831	Depleted in NES
	OTU_706	1.7164	NA	NA	NA	-4.37144	0.00865575	Enriched in NES
	OTU_707	NA	NA	-5.69808	0.00557213	-0.287355	0.927873	Enriched in NRP
	OTU_708	-0.214933	0.90845	4.6238	0.00871237	-3.58207	0.103371	Depleted in NRP
	OTU_71	1.98838	0.0989425	1.48399	0.0103928	-1.32692	0.0187127	Depleted in NRP, Enriched in NES
	OTU_710	0.397494	NA	-3.6937	0.00135752	3.56619	0.00217466	Enriched in NRP, Depleted in NES
	OTU_718	-2.3634	NA	-1.1111	0.320363	3.3156	0.017353	Depleted in NES
	OTU_72	0.32952	0.597497	-1.64456	0.00919268	2.79595	0.00036924	Enriched in NRP, Depleted in NES
	OTU_725	-0.000492392	0.927392	3.74462	0.0350026	-1.2241	0.826279	Depleted in NRP
	OTU_729	NA	NA	-5.44752	0.00557213	-0.121337	0.970406	Enriched in NRP
	OTU_73	-1.12707	0.0223772	1.85079	NA	0.531273	0.712536	Enriched in NRS
	OTU_735	NA	NA	-4.14967	0.00151164	5.00193	0.000425646	Enriched in NRP, Depleted in NES
	OTU_737	NA	NA	-6.44201	0.00199104	-0.139399	0.971157	Enriched in NRP
	OTU_739	NA	NA	-3.14261	0.0135581	3.99769	0.0065213	Enriched in NRP, Depleted in NES
	OTU_740	-1.02799	0.390816	0.663137	0.381863	3.89841	0.00447615	Depleted in NES
	OTU_741	1.46839	0.317859	-1.92954	0.151462	4.5934	0.0215765	Depleted in NES
	OTU_743	0.992191	0.633895	4.91618	0.0120589	-4.59608	0.0552793	Depleted in NRP
	OTU_745	NA	NA	NA	NA	-5.24956	0.00651545	Enriched in NES
	OTU_749	-0.615167	0.348561	4.57024	1.55638e-08	-1.69994	0.23593	Depleted in NRP
	OTU_75	-0.447979	0.665433	-3.05065	0.00575077	1.25842	0.420609	Enriched in NRP
	OTU_758	-2.48159	0.0162012	5.64483	6.17356e-07	-0.743202	NA	Enriched in NRS,Depleted in NRP
	OTU_759	3.58386	0.0277238	NA	NA	-1.2241	0.826279	Depleted in NRS
	OTU_760	0.201851	0.856547	-0.188914	0.72494	2.14382	0.00447615	Depleted in NES
	OTU_763	-4.52031	0.0261218	5.09252	0.00493943	NA	NA	Enriched in NRS,Depleted in NRP
	OTU_764	NA	NA	-4.88023	0.0102539	0.0779063	0.980151	Enriched in NRP
	OTU_772	3.10911	0.191512	-2.60823	0.0302504	1.23292	0.376827	Enriched in NRP
	OTU_774	0.31475	0.782321	4.73552	0.000371784	NA	NA	Depleted in NRP
	OTU_782	0.667203	0.613251	-1.98529	0.0100785	0.166606	0.889493	Enriched in NRP
	OTU_784	NA	NA	-5.39957	0.00557213	1.44791	0.489613	Enriched in NRP
	OTU_788	1.35674	NA	-2.59458	0.0428668	3.44429	0.0215765	Enriched in NRP, Depleted in NES
	OTU_79	1.7076	0.200851	3.61595	0.0422504	-2.37461	0.250228	Depleted in NRP
	OTU_793	NA	NA	-6.47469	0.00160534	-0.0469164	0.985644	Enriched in NRP
	OTU_796	-0.620742	0.756015	3.50529	0.0438403	-2.42746	0.182221	Depleted in NRP
	OTU_797	-0.721855	0.690085	4.66376	0.00583833	-3.69294	0.010725	Depleted in NRP, Enriched in NES
	OTU_80	-0.92773	0.541604	2.6104	0.00331131	-3.83487	0.00036924	Depleted in NRP, Enriched in NES
	OTU_808	-1.04518	NA	-6.67032	0.000818255	-0.124949	0.971157	Enriched in NRP
	OTU_816	-0.818491	0.697893	3.58131	0.0213898	NA	NA	Depleted in NRP
	OTU_82	0.806076	0.465246	-0.0879772	0.854739	-0.643629	0.00447615	Enriched in NES
	OTU_825	1.32091	0.66057	-2.51556	0.0530468	3.85711	0.0109016	Depleted in NES
	OTU_83	-0.701261	0.690085	-3.28729	0.0390473	-1.48784	0.548865	Enriched in NRP
	OTU_833	-1.41575	0.262873	4.4569	0.00203628	-2.37461	0.250228	Depleted in NRP
	OTU_84	0.635305	0.690085	4.2499	0.0047288	NA	NA	Depleted in NRP
	OTU_844	0.933304	NA	-7.9265	5.22348e-05	0.0882151	0.979916	Enriched in NRP
	OTU_846	NA	NA	-3.30719	0.0459213	1.83207	0.172785	Enriched in NRP
	OTU_85	0.777472	0.751203	-5.43863	0.0172008	1.42546	0.548865	Enriched in NRP
	OTU_851	1.71972	NA	-1.71193	0.403498	-2.69145	0.017353	Enriched in NES
	OTU_852	-3.59066	0.04328	4.60682	0.00214509	NA	NA	Enriched in NRS,Depleted in NRP
	OTU_854	-4.62227	0.0541032	5.11355	0.0131698	NA	NA	Depleted in NRP
	OTU_859	NA	NA	-4.78278	0.00675768	0.380514	0.897248	Enriched in NRP
	OTU_860	-3.0623	0.0842286	2.24661	0.0667203	-3.07319	0.0109016	Enriched in NES
	OTU_866	0.910898	0.677767	-2.33124	0.0321207	1.71656	0.0879907	Enriched in NRP
	OTU_869	-0.083397	NA	-3.02581	0.0274053	0.232581	0.883331	Enriched in NRP
	OTU_87	0.382091	0.249221	-1.98399	9.72366e-06	0.173204	0.866021	Enriched in NRP
	OTU_876	NA	NA	-4.38367	0.0151131	1.15388	0.573176	Enriched in NRP
	OTU_885	NA	NA	-4.13261	0.0218214	4.99917	0.017353	Enriched in NRP, Depleted in NES
	OTU_896	1.81726	0.516691	1.5932	NA	-3.64557	0.0465921	Enriched in NES
	OTU_900	-4.35091	0.0277238	3.96428	0.00583833	-2.91566	0.0406414	Enriched in NRS,Depleted in NRP, Enriched in NES
	OTU_903	-4.38292	0.0261218	2.97464	0.0412819	1.81618	0.498967	Enriched in NRS,Depleted in NRP
	OTU_924	0.294092	0.761196	4.01197	1.3736e-11	-0.723662	0.503774	Depleted in NRP
	OTU_934	0.793622	0.722508	-2.69389	0.0109866	4.51724	0.000218591	Enriched in NRP, Depleted in NES
	OTU_938	NA	NA	NA	NA	-3.68211	0.0203176	Enriched in NES
	OTU_947	-0.385638	0.854144	3.28049	0.0354295	NA	NA	Depleted in NRP
	OTU_95	0.974061	0.0162699	1.6711	0.0276325	-0.285479	0.826279	Depleted in NRS, Depleted in NRP
	OTU_96	-0.516902	0.214048	-1.3395	0.0110436	1.90053	0.000572059	Enriched in NRP, Depleted in NES
	OTU_97	0.530735	0.352881	-1.10383	0.0336151	1.53409	0.0261925	Enriched in NRP, Depleted in NES
	OTU_973	1.16576	0.256143	5.69272	3.68601e-06	-4.25388	0.0284623	Depleted in NRP, Enriched in NES
	OTU_979	2.55971	0.249221	NA	NA	-5.48475	0.000949587	Enriched in NES
	OTU_98	3.68394	0.0209278	-0.51911	0.647116	-0.286964	0.897248	Depleted in NRS
	OTU_983	-0.278863	0.8052	1.84304	0.0231714	-0.638743	0.586707	Depleted in NRP
	OTU_988	-2.94189	0.169457	3.50529	0.0438403	NA	NA	Depleted in NRP
	OTU_989	-4.00653	0.0172106	4.55191	0.00108838	NA	NA	Enriched in NRS,Depleted in NRP
	OTU_99	0.941503	0.53614	-3.55345	0.00919268	-1.80249	0.278005	Enriched in NRP
	OTU_995	NA	NA	-4.24889	0.000451356	0.708418	0.490831	Enriched in NRP
	OTU_998	-0.444785	0.785766	3.89962	0.0340726	-2.10623	0.46481	Depleted in NRP

## Sheet: Table S3
	Table S3. PERMANOVA analysis of weighted UniFrac distances between diseased and normal group. (BS: Bulk soil; RS: Rhizosphere; RP: Rhizoplane; ES: Endosphere.)
	bacteria				fungus
	BS				BS
	Factor	% Explained	P value		Factor	% Explained	P value
	Disease	0.3108	0.010**		Disease	0.4396	0.034*
	RS				RS
	Factor	% Explained	P value		Factor	% Explained	P value
	Disease	0.4492	0.001***		Disease	0.4826	0.001***
	RP				RP
	Factor	% Explained	P value		Factor	% Explained	P value
	Disease	0.4998	0.001***		Disease	0.5498	0.010**
	ES				ES
	Factor	% Explained	P value		Factor	% Explained	P value
	Disease	0.4533	0.001***		Disease	0.6038	0.010**

## Sheet: Table S4
	Table S4. OTUs that are significantly differentially abundant between normal and diseased groups in the four niches. Hypothesis testing was carried out using a likelihood ratio test (p< 0.05). (A) Bulk soil; (B) Rhizosphere; (C) Rhizoplane; (D) Endosphere.
	(A)
	bactrial OTUs_number	log2FC	lgMeanOTUs	padj		bactrial OTUs_number	log2FC	logMean OTUs	padj
	OTU_2033	-6.39424	0.818	0.046432		OTU_158	-8.66453	1.776	0.000930068
	OTU_1081	-5.96702	0.692	0.00785026		OTU_129	-7.94134	1.511	7.69047e-33
	OTU_1009	-5.76089	0.628	0.0101311		OTU_51	-7.05569	2.166	1.47443e-07
	OTU_1276	-5.60291	0.584	0.0108273		OTU_120	-6.89634	1.195	9.58703e-20
	OTU_700	-5.56458	0.929	3.06695e-07		OTU_84	-6.65129	2.484	3.60096e-05
	OTU_1615	-5.51047	0.554	0.0122863		OTU_2144	-6.18105	1.028	0.00372083
	OTU_3633	-5.25356	0.477	0.0163303		OTU_173	-5.95519	0.916	6.38545e-13
	OTU_734	-5.2169	0.677	2.24107e-06		OTU_121	-5.77242	0.86	1.19667e-10
	OTU_1381	-5.18815	0.611	0.015459		OTU_163	-5.71855	0.84	1.86742e-10
	OTU_1612	-4.98357	0.398	0.021037		OTU_269	-5.71734	1.025	8.91269e-06
	OTU_2895	-4.98357	0.398	0.021037		OTU_389	-5.70569	0.875	4.03708e-05
	OTU_1232	-4.849	0.512	0.0233714		OTU_647	-5.60942	0.802	0.00429754
	OTU_1562	-4.82517	0.352	0.0233257		OTU_152	-5.50164	0.916	0.000243364
	OTU_1412	-4.79657	0.942	0.0024209		OTU_43	-5.3147	1.93	3.77328e-37
	OTU_1397	-4.75394	0.383	0.000282468		OTU_264	-5.24172	0.845	2.68098e-09
	OTU_1683	-4.73118	0.523	2.64861e-06		OTU_560	-5.15058	0.818	0.000294009
	OTU_2063	-4.72316	0.383	0.0124225		OTU_48	-5.11509	3.016	0.00429754
	OTU_2178	-4.71273	0.319	0.0254753		OTU_430	-5.0336	0.602	0.0133025
	OTU_1452	-4.63976	0.336	0.000102463		OTU_2050	-4.7323	1.286	3.20309e-12
	OTU_916	-4.57104	0.301	0.000901346		OTU_2614	-4.69099	0.534	2.83589e-06
	OTU_2067	-4.55059	0.283	0.00374517		OTU_1047	-4.52677	0.465	0.00148022
	OTU_2219	-4.5435	0.263	0.0389574		OTU_1342	-4.51002	0.523	0.0160703
	OTU_852	-4.52635	0.465	3.25242e-05		OTU_352	-4.49417	0.477	2.44234e-05
	OTU_1374	-4.49105	0.452	3.54585e-05		OTU_2145	-4.49417	0.477	2.44234e-05
	OTU_2266	-4.48799	0.301	0.000186613		OTU_425	-4.49279	0.477	1.05367e-05
	OTU_2096	-4.40555	0.222	0.0441913		OTU_7	-4.47302	2.493	9.91612e-16
	OTU_1657	-4.39081	0.283	0.0193834		OTU_31	-4.37822	2.293	2.24828e-17
	OTU_937	-4.33303	0.807	0.0210955		OTU_37	-4.36276	2.104	1.60636e-09
	OTU_2539	-4.3242	0.2	0.0450167		OTU_609	-4.34359	0.574	0.00336813
	OTU_1186	-4.28988	0.222	0.0050455		OTU_813	-4.30874	0.452	0.0041039
	OTU_966	-4.12369	0.747	0.027588		OTU_285	-4.27895	0.72	5.29563e-07
	OTU_1797	-4.05451	0.319	0.00387156		OTU_273	-4.27349	0.412	5.13606e-05
	OTU_943	-4.00865	0.845	2.08891e-05		OTU_727	-4.25515	0.398	0.00524675
	OTU_704	-3.99604	1.079	0.0306036		OTU_623	-4.24764	0.368	0.0266252
	OTU_3346	-3.86979	0.125	0.0380765		OTU_1076	-4.19623	1.051	3.26154e-11
	OTU_1220	-3.86068	0.426	0.000264331		OTU_802	-4.15688	0.512	0.00119187
	OTU_1234	-3.82555	0.097	0.00534833		OTU_347	-4.13628	0.706	0.00352672
	OTU_2862	-3.78647	0.097	0.0105359		OTU_463	-4.1208	2.163	0.000818452
	OTU_543	-3.75331	1.1	0.0448614		OTU_56	-4.08295	1.725	5.37322e-23
	OTU_4099	-3.73553	0.222	0.0140572		OTU_261	-4.05659	1.021	5.32562e-10
	OTU_1789	-3.63726	0.035	0.00843939		OTU_657	-3.99944	0.368	0.0277432
	OTU_1233	-3.62249	0.035	0.00843939		OTU_628	-3.96127	0.301	0.00182256
	OTU_808	-3.53284	0.602	0.000683528		OTU_46	-3.91601	2.727	3.11069e-10
	OTU_1313	-3.52207	0.151	0.0291113		OTU_459	-3.85979	0.283	0.00119986
	OTU_1382	-3.49918	0.336	0.0152157		OTU_519	-3.8462	0.283	0.000591087
	OTU_1519	-3.46066	0.151	0.00943069		OTU_67	-3.80103	1.324	9.71917e-15
	OTU_2049	-3.45816	0	0.0396771		OTU_570	-3.77366	0.263	0.000907345
	OTU_1798	-3.39834	0.151	0.0222701		OTU_677	-3.76927	0.412	0.00157963
	OTU_105	-3.39232	2.051	2.54502e-12		OTU_841	-3.63713	0.243	0.0109157
	OTU_1453	-3.38498	-0.038	0.0183736		OTU_521	-3.62413	0.352	0.0210493
	OTU_726	-3.35358	0.554	0.000120288		OTU_1423	-3.58215	0.368	0.00190801
	OTU_5343	-3.20208	-0.079	0.0469924		OTU_2751	-3.5434	0.336	0.00473806
	OTU_5307	-3.20193	0.067	0.0372529		OTU_2126	-3.51789	0.2	0.0108426
	OTU_203	-3.14853	1.1	0.00507832		OTU_332	-3.50406	0.916	0.00233179
	OTU_5040	-3.14109	0.067	0.0222701		OTU_567	-3.50179	0.176	0.00358456
	OTU_851	-3.12791	0.593	0.000728815		OTU_363	-3.4994	0.176	0.00292266
	OTU_3354	-3.07008	1.782	0.000128712		OTU_612	-3.4869	0.176	0.0041039
	OTU_4865	-3.05278	0.645	4.87252e-05		OTU_1314	-3.47564	0.477	0.00372083
	OTU_1906	-3.01234	0.035	0.0335791		OTU_508	-3.44454	0.477	0.00047553
	OTU_2591	-3.00877	0.439	0.00843939		OTU_2077	-3.42584	1.596	1.30212e-15
	OTU_1030	-2.99002	0.035	0.0482758		OTU_1343	-3.39944	0.319	0.00310109
	OTU_3395	-2.97824	0.176	0.0209698		OTU_736	-3.37605	0.283	0.0203228
	OTU_3829	-2.93062	0.916	1.31245e-06		OTU_1412	-3.34958	0.125	0.0475976
	OTU_285	-2.92937	1.354	9.59402e-09		OTU_181	-3.32906	1.217	2.17263e-05
	OTU_1094	-2.92516	0.88	0.00804035		OTU_402	-3.29141	0.283	0.00447293
	OTU_4254	-2.91534	0.439	0.0024209		OTU_153	-3.28778	1.136	9.24639e-09
	OTU_799	-2.88403	0.426	0.00279523		OTU_528	-3.27974	0.699	9.24803e-05
	OTU_983	-2.86341	0.151	0.030743		OTU_199	-3.27617	1.13	7.05849e-08
	OTU_1904	-2.76556	0.637	0.000854031		OTU_571	-3.27193	0.263	0.00859601
	OTU_1260	-2.75553	0.398	0.00931282		OTU_624	-3.25546	0.263	0.00542055
	OTU_1010	-2.74575	0.564	0.00184038		OTU_374	-3.24777	0.875	0.00296486
	OTU_486	-2.71601	1.061	0.00017527		OTU_13	-3.24293	2.106	3.90901e-07
	OTU_735	-2.69636	0.889	0.000186613		OTU_688	-3.23693	0.426	0.00265131
	OTU_191	-2.64256	1.828	7.27843e-06		OTU_562	-3.23051	0.125	0.0339539
	OTU_911	-2.61506	1.736	6.52716e-05		OTU_718	-3.23051	0.125	0.0339539
	OTU_1214	-2.5413	1.696	0.000128712		OTU_443	-3.2219	0.934	0.00146949
	OTU_1201	-2.45847	0.501	0.0190448		OTU_79	-3.20772	1.708	2.19211e-10
	OTU_71	-2.43465	2.102	3.44415e-06		OTU_122	-3.19639	1.416	1.49144e-12
	OTU_1666	-2.42011	0.301	0.0482758		OTU_483	-3.18924	0.412	0.00349973
	OTU_906	-2.41664	0.477	0.0085759		OTU_58	-3.17894	2.42	8.98429e-06
	OTU_3594	-2.41136	0.398	0.0138442		OTU_339	-3.17367	0.067	0.0231761
	OTU_2015	-2.37567	0.489	0.0222701		OTU_282	-3.08309	1.37	2.2361e-09
	OTU_5925	-2.35237	1.64	0.00150602		OTU_1014	-3.07728	0.035	0.0259435
	OTU_1078	-2.33676	0.465	0.0167583		OTU_492	-3.04568	0.035	0.0175748
	OTU_3761	-2.30953	0.368	0.0234187		OTU_277	-3.03548	0.2	0.0149606
	OTU_678	-2.27188	0.753	0.00308467		OTU_224	-3.02912	0.796	7.48908e-06
	OTU_929	-2.24964	0.439	0.016294		OTU_127	-3.02494	0.035	0.0174117
	OTU_1097	-2.20505	0.489	0.013126		OTU_928	-3.02264	0.035	0.015462
	OTU_556	-2.16772	1.176	0.000182601		OTU_2293	-2.98427	2.516	2.0202e-05
	OTU_590	-2.16182	0.593	0.0033349		OTU_303	-2.98266	1.222	0.0237716
	OTU_163	-2.13251	1.623	0.00510457		OTU_18	-2.9509	2.57	0.000331148
	OTU_1416	-2.12755	0.942	0.00369075		OTU_155	-2.9489	1.882	0.0288675
	OTU_147	-2.1073	1.895	3.25242e-05		OTU_810	-2.93899	0.352	0.0238481
	OTU_5164	-2.10654	1.505	0.00157738		OTU_113	-2.90826	1.188	1.87921e-08
	OTU_696	-2.03772	0.653	0.00308467		OTU_191	-2.9048	1.541	8.21081e-06
	OTU_713	-2.02285	0.544	0.0291624		OTU_2555	-2.89332	0	0.0231761
	OTU_6054	-1.97079	0.916	0.000732115		OTU_351	-2.85673	0.845	0.000371159
	OTU_293	-1.96912	1.273	0.00359378		OTU_36	-2.85308	2.608	1.53582e-10
	OTU_460	-1.95915	0.962	0.00369075		OTU_172	-2.8189	0.637	0.0244521
	OTU_381	-1.94715	1.249	0.00642914		OTU_169	-2.79008	1.23	2.38202e-09
	OTU_351	-1.9464	1.315	2.56549e-06		OTU_1133	-2.78671	0.661	0.00840887
	OTU_701	-1.94441	0.978	0.000752937		OTU_577	-2.78022	0.301	0.0335569
	OTU_763	-1.93877	0.544	0.0177188		OTU_241	-2.76916	1.525	2.07136e-05
	OTU_1103	-1.93299	0.706	0.00931282		OTU_445	-2.76694	0.653	0.0259155
	OTU_2461	-1.92487	0.489	0.0445669		OTU_85	-2.75673	1.141	0.000757867
	OTU_3729	-1.89523	0.954	0.00506267		OTU_460	-2.75295	0.125	0.0310482
	OTU_588	-1.87821	0.85	0.00308467		OTU_57	-2.7049	2.529	1.51061e-07
	OTU_553	-1.87794	0.894	0.00412107		OTU_419	-2.70284	0.784	0.00677274
	OTU_641	-1.86905	2.52	0.00155781		OTU_53	-2.64337	2.072	7.38598e-21
	OTU_4839	-1.86444	1.798	0.0380765		OTU_275	-2.63166	1.441	0.00469573
	OTU_4485	-1.81887	0.512	0.0281989		OTU_9	-2.62318	3.052	7.87548e-14
	OTU_1256	-1.78094	0.398	0.0489183		OTU_279	-2.61685	0.602	0.00140095
	OTU_1092	-1.77622	0.85	0.00199038		OTU_404	-2.59371	0.996	0.0332959
	OTU_1029	-1.71648	0.974	0.0229812		OTU_24	-2.58471	2.452	4.48879e-12
	OTU_3277	-1.70323	1.064	0.0380765		OTU_160	-2.58109	1.2	1.53285e-09
	OTU_1141	-1.67034	0.76	0.0202598		OTU_816	-2.56481	0.602	0.00265131
	OTU_1802	-1.66533	1.522	2.35691e-06		OTU_195	-2.56363	0.669	0.00282409
	OTU_90	-1.65112	1.79	3.03473e-05		OTU_362	-2.5592	0.067	0.0475091
	OTU_214	-1.63904	1.713	0.000732115		OTU_130	-2.54287	1.365	3.31903e-08
	OTU_115	-1.61013	1.904	0.0222701		OTU_211	-2.53084	1.273	4.18234e-06
	OTU_263	-1.60467	1.643	0.0115325		OTU_117	-2.51941	1.031	1.97482e-05
	OTU_1194	-1.60196	0.554	0.0497026		OTU_532	-2.51568	1.122	0.00706931
	OTU_275	-1.58832	1.085	0.000115805		OTU_573	-2.47754	0.835	0.0204675
	OTU_5335	-1.5726	0.584	0.0302651		OTU_2173	-2.47237	0.637	0.00256273
	OTU_463	-1.57122	0.989	0.0335064		OTU_470	-2.4723	1.082	0.0300241
	OTU_656	-1.56967	0.544	0.0371027		OTU_93	-2.43519	1.498	7.71629e-08
	OTU_5612	-1.55032	0.669	0.0217277		OTU_291	-2.41914	1.269	0.00820645
	OTU_2104	-1.53765	0.824	0.0151196		OTU_760	-2.40781	1.955	0.00865643
	OTU_634	-1.53414	0.772	0.0111409		OTU_39	-2.40228	1.014	5.01721e-05
	OTU_259	-1.52569	1.49	8.05775e-06		OTU_107	-2.3987	1.925	0.0255582
	OTU_478	-1.51905	1.048	0.00683383		OTU_432	-2.37994	0.176	0.0489186
	OTU_467	-1.51676	0.766	0.0118491		OTU_553	-2.36742	0.554	0.00878002
	OTU_94	-1.51183	1.873	0.0206588		OTU_80	-2.34492	0.934	0.0119811
	OTU_1585	-1.49772	1.847	0.000138807		OTU_323	-2.33311	0.889	0.0114707
	OTU_235	-1.49319	1.773	0.0277572		OTU_642	-2.23211	0.76	0.0217504
	OTU_787	-1.47562	0.912	0.0136313		OTU_620	-2.23084	0.501	0.00989983
	OTU_772	-1.4719	0.912	0.00510457		OTU_324	-2.18719	0.76	0.0301897
	OTU_135	-1.46689	2.226	5.45177e-05		OTU_2599	-2.18467	0.76	0.00719634
	OTU_418	-1.46457	1.224	0.00338456		OTU_895	-2.1833	0.574	0.0044452
	OTU_647	-1.4461	1.334	0.00110528		OTU_536	-2.17987	0.501	0.0169728
	OTU_335	-1.4065	1.193	0.0482758		OTU_386	-2.17869	1.122	0.00233179
	OTU_112	-1.40484	2.047	0.00259771		OTU_331	-2.17599	0.87	0.00110401
	OTU_249	-1.40267	1.446	0.0024209		OTU_157	-2.15883	1.632	0.000219464
	OTU_353	-1.39431	0.824	0.0138442		OTU_35	-2.14463	2.431	9.89836e-09
	OTU_6351	-1.38675	1.709	0.000135089		OTU_268	-2.11417	0.477	0.0126379
	OTU_1024	-1.38189	1.226	6.52716e-05		OTU_431	-2.09132	0.818	0.0312809
	OTU_55	-1.36817	2.584	0.000165308		OTU_14	-2.08039	2.406	4.43189e-05
	OTU_125	-1.36666	1.923	0.000836331		OTU_327	-2.07213	0.368	0.0368205
	OTU_137	-1.36579	1.708	2.95328e-05		OTU_369	-2.06453	0.611	0.00669906
	OTU_775	-1.35942	0.946	0.00536041		OTU_33	-2.06225	0.611	0.0247237
	OTU_95	-1.35758	2.526	0.0242294		OTU_789	-2.02945	1.998	0.00805523
	OTU_523	-1.34116	1.094	0.00150602		OTU_619	-1.99731	0.452	0.0239503
	OTU_932	-1.33468	0.807	0.0469924		OTU_242	-1.93851	1.464	2.09332e-09
	OTU_128	-1.32649	1.744	0.000560881		OTU_597	-1.91787	0.574	0.0305998
	OTU_6239	-1.31669	0.925	0.00843939		OTU_225	-1.8821	0.489	0.0233961
	OTU_155	-1.29519	1.694	0.000186613		OTU_2519	-1.80304	1.061	0.0346033
	OTU_837	-1.27698	0.813	0.0443321		OTU_423	-1.72783	0.584	0.025906
	OTU_1065	-1.27129	0.824	0.0295855		OTU_70	-1.72772	2.056	9.03744e-08
	OTU_83	-1.26233	2.118	0.000901346		OTU_2187	-1.689	1.161	0.0287227
	OTU_308	-1.25817	1.269	0.000134062		OTU_325	-1.6778	1.054	0.02215
	OTU_117	-1.25758	2.418	0.000942705		OTU_4	-1.66871	3.544	0.0160703
	OTU_352	-1.23868	1.29	0.0261813		OTU_308	-1.62437	0.875	0.0466447
	OTU_3204	-1.23143	1.136	0.00308467		OTU_233	-1.59226	1.226	0.000541447
	OTU_1160	-1.2177	1.125	0.00931282		OTU_236	-1.56802	0.899	0.00938436
	OTU_3474	-1.21488	2.152	3.44415e-06		OTU_256	-1.49033	0.958	0.034282
	OTU_1474	-1.19676	1.543	0.0438225		OTU_1622	-1.45957	0.958	0.00514968
	OTU_878	-1.19336	0.982	0.0268931		OTU_159	-1.40478	1.233	0.00989983
	OTU_350	-1.18851	1.299	0.00485647		OTU_2319	-1.34142	0.985	0.0312809
	OTU_5319	-1.18121	1.576	0.000186613		OTU_16	-1.32799	2.248	6.2897e-13
	OTU_605	-1.17451	1.138	0.00316287		OTU_1100	-1.28902	2.001	1.13064e-06
	OTU_45	-1.17303	2.121	0.0284988		OTU_534	-1.24529	0.818	0.0398803
	OTU_57	-1.16606	2.143	0.00558415		OTU_1928	-1.23713	1.755	0.0150669
	OTU_1285	-1.1602	0.845	0.0423219		OTU_38	-1.21138	2.124	6.7365e-08
	OTU_324	-1.15794	1.315	0.00363643		OTU_90	-1.16509	2.172	0.00172666
	OTU_243	-1.1536	1.224	0.0448614		OTU_124	-1.13689	1.713	0.0216231
	OTU_20	-1.14816	2.732	6.1176e-07		OTU_92	-1.09998	1.741	0.0208118
	OTU_495	-1.12236	1.437	0.0329347		OTU_358	-1.07866	0.87	0.0410357
	OTU_167	-1.11532	1.898	0.0448614		OTU_444	-1.03712	1.011	0.0391278
	OTU_550	-1.11497	1.297	0.00143563		OTU_47	-0.865357	2.232	0.00135524
	OTU_861	-1.11016	1.46	0.0400578		OTU_133	-0.704707	1.632	0.0340918
	OTU_2381	-1.09129	1.419	0.00824162		OTU_146	1.11201	1.656	0.0309847
	OTU_4739	-1.08465	1.374	0.00108432		OTU_338	1.34889	0.835	0.0328516
	OTU_5563	-1.08224	2.07	0.000264331		OTU_125	1.43736	1.485	0.00265131
	OTU_2151	-1.07138	1.021	0.0199253		OTU_272	1.4547	0.912	0.0389253
	OTU_233	-1.07027	1.847	0.021037		OTU_449	1.46005	0.645	0.0460898
	OTU_339	-1.05718	1.457	0.0447961		OTU_349	1.5839	1.174	0.0288675
	OTU_149	-1.05494	1.762	0.017046		OTU_222	1.60254	0.88	0.00425625
	OTU_402	-1.04822	0.996	0.0217953		OTU_375	1.62566	0.62	0.00903484
	OTU_239	-1.04348	1.523	0.00194851		OTU_10	1.66801	2.891	3.18198e-23
	OTU_56	-1.04052	1.893	0.00858045		OTU_250	1.6826	1.041	0.000528315
	OTU_494	-1.03309	1.253	0.0441913		OTU_110	1.75269	1.701	0.0346557
	OTU_4145	-1.03287	2.655	0.00369075		OTU_606	1.77989	0.74	0.0118259
	OTU_1702	-1.02772	1.685	0.000230454		OTU_95	1.78863	2.216	0.0398649
	OTU_3446	-1.02065	1.241	0.0086387		OTU_45	1.802	1.625	9.41873e-05
	OTU_5600	-1.01166	1.306	0.00259771		OTU_267	1.82164	0.301	0.0407165
	OTU_378	-1.00841	1.259	0.0479942		OTU_359	1.87889	0.796	0.000465399
	OTU_26	-1.0053	2.321	0.000373001		OTU_249	1.88774	1	0.000255087
	OTU_38	-0.994363	2.34	2.56549e-06		OTU_184	1.89434	0.653	0.015386
	OTU_127	-0.987031	2.215	0.0163303		OTU_145	1.903	2.131	0.047243
	OTU_5328	-0.986836	1.609	0.0448614		OTU_221	1.92204	0.593	0.00381271
	OTU_450	-0.982165	0.97	0.0430981		OTU_217	1.96665	0.818	0.000183798
	OTU_4	-0.980993	2.925	0.027588		OTU_488	1.98157	0.439	0.0271873
	OTU_386	-0.980604	1.701	0.0252026		OTU_204	2.06794	1.37	0.000168995
	OTU_1206	-0.970029	1.051	0.0270835		OTU_136	2.08268	2.078	0.00633044
	OTU_254	-0.963818	1.719	1.21428e-05		OTU_154	2.08963	1.644	0.0138776
	OTU_5930	-0.942835	2.116	0.00709189		OTU_334	2.11951	1.156	0.00468544
	OTU_291	-0.937133	1.573	0.00694103		OTU_782	2.17733	0.319	0.0138267
	OTU_323	-0.933753	1.447	0.0118491		OTU_94	2.17864	1.658	3.10686e-05
	OTU_145	-0.916309	1.745	0.00931282		OTU_411	2.18006	1.267	0.000757867
	OTU_362	-0.910579	1.425	0.00134798		OTU_207	2.21606	1.048	8.34107e-05
	OTU_1579	-0.900603	1.56	0.00111666		OTU_318	2.22678	0.974	0.0196481
	OTU_212	-0.888787	1.255	0.0190448		OTU_383	2.24253	1.19	0.0113462
	OTU_74	-0.885931	2.474	0.0101518		OTU_132	2.24444	1.405	0.00636243
	OTU_154	-0.879184	2.086	0.00110528		OTU_520	2.27699	1.211	6.92074e-05
	OTU_302	-0.878617	1.628	0.00529355		OTU_202	2.30628	1.041	0.0108426
	OTU_3132	-0.874034	1.956	0.00308467		OTU_81	2.31244	2.076	0.00429754
	OTU_2308	-0.872099	1.377	0.0322041		OTU_541	2.35381	0.699	0.00855198
	OTU_354	-0.849532	1.751	0.0266971		OTU_495	2.40644	0.602	0.00686339
	OTU_592	-0.847183	1.419	0.00345554		OTU_598	2.41669	1.064	5.42727e-05
	OTU_5063	-0.836402	1.966	0.0251283		OTU_102	2.44897	1.913	0.0210493
	OTU_3651	-0.81294	2.134	0.0177513		OTU_422	2.46197	0.865	0.00233179
	OTU_37	-0.808218	2.583	0.00365093		OTU_167	2.47787	0.916	6.44682e-06
	OTU_142	-0.790403	2.61	3.03473e-05		OTU_342	2.49245	0.74	0.000373705
	OTU_13	-0.784331	2.845	0.0437385		OTU_1390	2.55271	1.197	5.00843e-06
	OTU_131	-0.78377	1.871	0.000135089		OTU_530	2.56738	0.894	0.0028326
	OTU_689	-0.746158	1.352	0.0217953		OTU_240	2.57358	1.259	9.24021e-05
	OTU_184	-0.743971	1.421	0.0349707		OTU_30	2.58487	2.779	6.65657e-08
	OTU_4375	-0.741853	2.182	0.0119416		OTU_591	2.58576	0.637	0.000255087
	OTU_50	-0.737115	2.548	0.00663046		OTU_505	2.59334	0.677	0.00012907
	OTU_211	-0.707564	1.57	0.00458864		OTU_104	2.59669	1.517	0.0138267
	OTU_16	-0.684732	2.938	0.00617469		OTU_511	2.60772	0.584	0.0150669
	OTU_103	-0.639706	1.808	0.0143224		OTU_452	2.63608	0.929	0.0290223
	OTU_140	-0.61688	1.767	0.0485798		OTU_397	2.64065	0.766	0.000255087
	OTU_206	0.440913	1.745	0.0450195		OTU_123	2.67368	2.096	0.0126896
	OTU_5	0.491754	2.821	0.0295342		OTU_480	2.68926	0.692	0.0237716
	OTU_1598	0.506023	1.71	0.0448614		OTU_486	2.71465	0.368	0.00359931
	OTU_24	0.570814	2.144	0.00071654		OTU_265	2.75264	0.962	1.00063e-06
	OTU_81	0.582785	2.149	0.0184268		OTU_583	2.77981	0.465	0.000564879
	OTU_489	0.646484	2.486	0.0253806		OTU_1131	2.78702	0.398	0.0361878
	OTU_52	0.670305	2.417	0.0448614		OTU_59	2.82771	2.376	0.00257819
	OTU_91	0.680025	2.393	0.0227906		OTU_197	2.85611	1.308	0.000907345
	OTU_86	0.687579	1.812	0.00843939		OTU_726	2.85896	0.477	0.00102858
	OTU_705	0.689283	1.737	0.00900168		OTU_295	2.86723	0.778	9.6584e-07
	OTU_714	0.756988	1.645	0.0255047		OTU_774	2.91954	0.426	0.00744137
	OTU_88	0.757893	2.202	0.0103778		OTU_29	2.92256	2.862	5.76139e-06
	OTU_28	0.767587	2.387	0.00845573		OTU_61	2.94522	2.358	0.00339799
	OTU_453	0.807762	1.286	0.0479942		OTU_866	2.97306	-0.301	0.0394035
	OTU_368	0.827899	1.503	0.0242294		OTU_91	2.97981	1.635	3.83267e-08
	OTU_133	0.834046	1.941	0.00779437		OTU_105	2.99665	1.597	5.19422e-08
	OTU_225	0.842371	1.971	0.00109172		OTU_255	3.01181	1.261	7.43411e-05
	OTU_1003	0.849878	1.526	0.0372647		OTU_75	3.02741	1.314	6.78136e-05
	OTU_141	0.869595	1.978	0.00110528		OTU_442	3.04715	0.593	0.00366575
	OTU_984	0.899692	2.081	0.000899103		OTU_76	3.05196	0.501	0.00210878
	OTU_1747	0.901886	1.344	0.0057364		OTU_141	3.05365	1.988	4.74392e-09
	OTU_31	0.916921	2.867	0.00485647		OTU_266	3.05527	-0.079	0.0332959
	OTU_670	0.922667	1.414	0.0147532		OTU_2379	3.05527	-0.079	0.0332959
	OTU_5614	0.933612	1.878	0.0303408		OTU_98	3.05841	2.232	0.0337243
	OTU_4153	0.934832	1.487	0.000963203		OTU_1627	3.06608	1.987	3.79704e-06
	OTU_207	0.940225	1.686	0.000473247		OTU_451	3.06984	0.807	0.0113462
	OTU_3042	0.941822	1.368	0.0105359		OTU_137	3.07434	1.404	8.021e-06
	OTU_134	0.942363	1.799	0.00466783		OTU_415	3.07954	0.85	2.56868e-05
	OTU_731	0.949631	1.166	0.0379816		OTU_15	3.09913	2.744	2.81153e-25
	OTU_205	0.954759	1.539	0.0247945		OTU_86	3.10493	1.476	5.09707e-05
	OTU_36	0.955806	2.552	0.00713947		OTU_2042	3.12429	0.778	1.90726e-05
	OTU_373	0.966904	1.625	0.00631154		OTU_406	3.20473	0.383	0.000995801
	OTU_5827	0.967878	1.608	0.00709189		OTU_313	3.21603	-0.234	0.0237716
	OTU_126	0.973827	1.949	0.00282499		OTU_337	3.2443	1.038	0.000128047
	OTU_419	0.999598	1.483	0.0133755		OTU_540	3.25556	0.753	0.000130109
	OTU_422	1.03385	1.462	0.00228173		OTU_183	3.26772	1.541	0.0209968
	OTU_61	1.03968	2.293	0.000636741		OTU_161	3.27009	1.149	3.79695e-15
	OTU_306	1.06314	1.301	0.0203641		OTU_11	3.33745	3.433	0.00351371
	OTU_201	1.06433	1.765	0.00014069		OTU_887	3.35039	0.523	0.000698915
	OTU_143	1.0734	1.901	0.0163303		OTU_1037	3.36778	2.566	4.154e-11
	OTU_4029	1.08193	1.255	0.0119416		OTU_661	3.39119	-0.176	0.0261291
	OTU_181	1.08521	1.617	0.0144433		OTU_1016	3.42232	0.151	0.0133025
	OTU_162	1.09013	1.753	0.000112149		OTU_733	3.43605	0.035	0.00989983
	OTU_803	1.11154	0.899	0.0482758		OTU_472	3.45488	0.645	0.000285601
	OTU_457	1.16751	1.226	0.00931282		OTU_312	3.46174	0.645	0.000314762
	OTU_566	1.19083	1.117	0.00785026		OTU_797	3.48335	0.067	0.0245934
	OTU_615	1.1937	1.171	0.0107951		OTU_41	3.49811	2.148	3.04325e-12
	OTU_21	1.211	2.658	1.12849e-07		OTU_527	3.51438	0.035	0.0133934
	OTU_4965	1.23491	1.466	0.0252091		OTU_773	3.51552	-0.125	0.0146095
	OTU_646	1.25981	1.22	0.0266971		OTU_833	3.51552	-0.125	0.0146095
	OTU_2283	1.2627	0.772	0.0440003		OTU_1205	3.51552	-0.125	0.0146095
	OTU_886	1.27846	1.233	0.0270835		OTU_421	3.57879	0.477	0.00157728
	OTU_114	1.28359	2.127	0.0125706		OTU_1177	3.64444	0.035	0.0498872
	OTU_476	1.30753	1.195	0.0163303		OTU_496	3.65292	0.067	0.0113462
	OTU_187	1.31028	1.598	0.00282499		OTU_475	3.66285	-0.125	0.0204675
	OTU_1967	1.3359	1.807	0.0024209		OTU_403	3.69376	-0.125	0.0444021
	OTU_280	1.34705	1.527	3.22844e-07		OTU_288	3.70834	1.169	4.39309e-07
	OTU_210	1.35109	1.552	0.00282499		OTU_1127	3.72561	0.263	0.00256854
	OTU_370	1.36608	1.329	0.00318528		OTU_257	3.75989	1.577	0.000420935
	OTU_213	1.36698	1.985	6.63555e-05		OTU_613	3.78676	0.661	0.00112465
	OTU_440	1.39416	1.57	0.00387624		OTU_229	3.79335	2.96	0.0194128
	OTU_237	1.42617	1.233	0.00977798		OTU_177	3.88178	0.982	9.13182e-08
	OTU_659	1.43116	0.996	0.045128		OTU_547	3.95506	0.035	0.0158652
	OTU_4782	1.45767	0.766	0.0269753		OTU_696	3.98701	-0.038	0.0324642
	OTU_533	1.4597	1.067	0.000752186		OTU_259	4.01922	0.802	1.47443e-07
	OTU_5021	1.48705	1.587	0.00387624		OTU_343	4.11743	0.855	0.0231648
	OTU_666	1.51127	1.197	0.0042003		OTU_354	4.12919	0.035	0.00127108
	OTU_264	1.51838	1.771	0.0151927		OTU_322	4.12969	0.067	0.00210878
	OTU_1230	1.52108	0.677	0.045128		OTU_578	4.13338	0	0.0295179
	OTU_359	1.55248	1.543	1.36281e-05		OTU_1450	4.14649	0.243	0.000992747
	OTU_551	1.55706	1.503	0.016294		OTU_17	4.15771	2.95	0.0107816
	OTU_568	1.56385	1.133	0.00521574		OTU_683	4.19704	0.243	0.00020797
	OTU_1131	1.57289	1.028	0.0286626		OTU_99	4.24904	0.86	3.07754e-05
	OTU_230	1.58518	0.796	0.0448614		OTU_139	4.28185	1.133	4.8808e-08
	OTU_1355	1.58955	0.692	0.0268931		OTU_109	4.28381	1.731	0.00031805
	OTU_2201	1.59043	0.903	0.00347674		OTU_751	4.31139	0.125	0.00132024
	OTU_468	1.60429	1.334	0.00143563		OTU_306	4.31143	0.706	3.373e-05
	OTU_874	1.608	0.889	0.0381282		OTU_355	4.31812	0.778	3.11979e-06
	OTU_1035	1.61295	1.094	0.0134188		OTU_63	4.35195	2.531	3.28014e-06
	OTU_1871	1.62271	1.235	0.0145659		OTU_585	4.38595	0.097	0.002407
	OTU_819	1.64352	0.669	0.017704		OTU_2670	4.39676	0.097	0.00304483
	OTU_1169	1.66382	0.628	0.0291624		OTU_500	4.39896	0.452	4.27393e-06
	OTU_931	1.68493	1.103	0.0120669		OTU_429	4.40365	0.243	0.0218605
	OTU_429	1.68816	1.253	0.0247945		OTU_576	4.41011	0.283	0.00132024
	OTU_3778	1.69955	2.584	0.0221312		OTU_321	4.456	0.125	0.000519405
	OTU_2551	1.71422	0.611	0.0306467		OTU_380	4.46482	1.188	0.00410058
	OTU_1954	1.7253	1.097	0.00143563		OTU_568	4.50698	0.176	0.00014241
	OTU_3159	1.73312	0.692	0.0117239		OTU_1199	4.51601	0.151	0.000930068
	OTU_499	1.73597	1.169	0.00032279		OTU_437	4.54181	0.125	0.0173139
	OTU_522	1.73988	0.938	0.0130801		OTU_510	4.54181	0.125	0.0173139
	OTU_341	1.74158	1.512	0.02301		OTU_531	4.54181	0.125	0.0173139
	OTU_617	1.74197	1.011	0.0455983		OTU_566	4.54181	0.125	0.0173139
	OTU_340	1.74582	1.22	0.0177513		OTU_999	4.54181	0.125	0.0173139
	OTU_991	1.75423	0.653	0.0120669		OTU_1088	4.56527	0.176	0.00140095
	OTU_2968	1.76687	0.523	0.0480479		OTU_2421	4.56527	0.176	0.00140095
	OTU_1841	1.77567	0.534	0.0346327		OTU_1226	4.70966	0.2	0.00152901
	OTU_936	1.78626	0.584	0.0154862		OTU_933	4.71982	0.2	0.014611
	OTU_161	1.82856	1.445	0.0396616		OTU_1125	4.72376	0.243	0.000260088
	OTU_199	1.83043	1.467	0.0024209		OTU_829	4.76936	0.283	0.00402073
	OTU_1368	1.83216	1.045	0.0183736		OTU_21	4.79627	2.913	0.00157728
	OTU_346	1.83427	1.169	0.0138442		OTU_377	4.79685	0.283	0.000567887
	OTU_5707	1.83504	0.684	0.0310098		OTU_378	4.85483	0.263	1.18052e-05
	OTU_934	1.84529	0.958	0.0302651		OTU_401	4.86167	0.243	0.00132024
	OTU_753	1.87842	0.962	0.010416		OTU_187	4.86967	1.808	0.0202346
	OTU_265	1.8821	1.689	1.57691e-05		OTU_165	4.88737	0.243	0.00233179
	OTU_914	1.89489	0.452	0.0367996		OTU_542	4.88908	0.222	0.0140882
	OTU_676	1.92316	0.796	0.00190945		OTU_281	4.97835	0.319	7.51245e-06
	OTU_503	1.94729	1.035	0.011428		OTU_284	5.04305	0.477	3.69557e-07
	OTU_630	1.96462	0.934	0.046432		OTU_388	5.06908	0.352	5.59798e-05
	OTU_288	1.9989	1.516	0.00282499		OTU_216	5.07516	0.916	4.03258e-13
	OTU_2278	1.99901	0.412	0.0329347		OTU_366	5.08145	0.352	4.6821e-05
	OTU_1098	2.01364	0.942	0.0292637		OTU_387	5.13144	0.352	8.08018e-07
	OTU_1020	2.02123	0.79	0.00369075		OTU_408	5.21987	1.021	0.00586709
	OTU_779	2.03141	0.489	0.0145092		OTU_283	5.30265	0.352	0.00127124
	OTU_2620	2.05043	0.692	0.0441504		OTU_592	5.31515	0.426	2.0308e-05
	OTU_2383	2.05412	0.602	0.0414722		OTU_822	5.32618	1.559	0.0028722
	OTU_3266	2.08744	0.352	0.0367996		OTU_317	5.36504	0.368	0.00701307
	OTU_793	2.09268	0.611	0.00683383		OTU_298	5.39622	1.382	3.55575e-06
	OTU_4450	2.12329	0.593	0.0255624		OTU_405	5.42885	0.452	2.17263e-05
	OTU_222	2.12398	1.597	0.00157738		OTU_68	5.43157	2.116	0.0150669
	OTU_417	2.13461	1.255	0.00589991		OTU_481	5.43755	0.465	1.53923e-05
	OTU_854	2.13581	0.661	0.0122438		OTU_114	5.43846	2.064	0.0138267
	OTU_1175	2.14657	0.523	0.0247945		OTU_49	5.46864	2.454	0.0101511
	OTU_180	2.15082	2.119	0.0179733		OTU_246	5.51254	0.564	0.00483254
	OTU_465	2.15229	1.091	0.0291113		OTU_292	5.51886	0.412	0.00650388
	OTU_824	2.17038	0.97	0.00949688		OTU_504	5.51886	0.412	0.00650388
	OTU_1392	2.17362	0.465	0.043421		OTU_296	5.52689	0.439	1.25283e-05
	OTU_309	2.19668	1.537	0.00663046		OTU_368	5.60563	0.512	2.71444e-07
	OTU_723	2.23632	0.301	0.0420479		OTU_2	5.62764	2.895	1.97482e-05
	OTU_844	2.23866	0.95	0.00128658		OTU_27	5.78975	2.243	1.13136e-33
	OTU_357	2.25092	0.684	0.0120669		OTU_276	5.79551	0.661	3.14052e-05
	OTU_1115	2.32199	0.564	0.0447961		OTU_5	5.82677	3.51	2.17263e-05
	OTU_977	2.3256	0.574	0.0138442		OTU_330	5.89379	1.217	0.00320272
	OTU_919	2.34737	0.79	0.0168038		OTU_711	5.93044	0.602	6.42141e-10
	OTU_2060	2.41786	1.171	0.000411681		OTU_862	5.97735	1.421	4.82006e-34
	OTU_1036	2.55198	0.489	0.0295855		OTU_77	6.0755	1.874	1.02578e-09
	OTU_825	2.56491	0.383	0.0154592		OTU_83	6.09536	0.602	0.000218327
	OTU_1647	2.58363	0.564	0.0024209		OTU_26	6.19672	2.214	2.40963e-81
	OTU_859	2.58391	0.398	0.0163303		OTU_78	6.36228	1.597	0.000224888
	OTU_4488	2.62686	0.501	0.00506267		OTU_209	6.3635	0.734	1.06106e-08
	OTU_796	2.657	0.72	0.0104115		OTU_28	6.5823	2.693	0.000174776
	OTU_1852	2.68151	0.584	0.0113527		OTU_74	6.94554	0.845	0.00020959
	OTU_671	2.69607	0.942	0.000135089		OTU_12	7.07011	0.894	4.14921e-05
	OTU_1828	2.72883	0.151	0.0430981		OTU_19	7.18029	2.202	1.53125e-20
	OTU_755	2.76758	0.74	0.0130141		OTU_208	7.27734	1.014	3.30052e-11
	OTU_893	2.78229	0.512	0.0133755		OTU_69	7.46739	1.054	1.24751e-06
	OTU_798	2.81672	0.692	0.00520375		OTU_103	8.38321	1.275	3.59199e-06
	OTU_740	2.81876	0.439	0.0168043		OTU_128	9.99829	1.838	4.24975e-08
	OTU_802	2.84811	1.079	0.000999769
	OTU_949	2.89811	0.574	0.00308467
	OTU_552	2.919	0.85	0.00996457
	OTU_1809	2.93351	0.2	0.0499237
	OTU_629	2.95185	0.661	0.00466708
	OTU_1112	2.98955	0.067	0.0328242
	OTU_2373	3.00924	0.602	0.0033441
	OTU_1149	3.01353	0.067	0.0351869
	OTU_3344	3.09473	0.263	0.0327308
	OTU_1300	3.09896	0.263	0.02301
	OTU_1564	3.10648	0.611	0.00268133
	OTU_1026	3.12926	0.523	0.00709189
	OTU_1498	3.23686	-0.038	0.0326824
	OTU_1462	3.29567	-0.038	0.0450195
	OTU_910	3.29848	0.778	0.00268133
	OTU_423	3.30679	1.213	0.00090289
	OTU_1419	3.32558	0	0.0303408
	OTU_2624	3.4172	0.319	0.00868432
	OTU_3455	3.43351	0.2	0.0225048
	OTU_1298	3.43359	0.2	0.0238062
	OTU_999	3.43486	0.2	0.0181333
	OTU_1148	3.43858	0	0.0387175
	OTU_1818	3.44613	0.035	0.0335064
	OTU_1783	3.49561	0.2	0.00663046
	OTU_1573	3.49836	0.368	0.0024209
	OTU_784	3.51935	0.2	0.00973693
	OTU_939	3.52849	0.845	0.0024209
	OTU_1486	3.56263	0.2	0.024517
	OTU_548	3.59471	0.067	0.00827242
	OTU_441	3.59554	1.241	0.0013879
	OTU_1151	3.64942	0.097	0.0138442
	OTU_1246	3.69955	0.283	0.0357809
	OTU_869	3.7094	1.206	0.00195669
	OTU_1367	3.72246	0.125	0.0448614
	OTU_1555	3.72246	0.125	0.0448614
	OTU_1848	3.72246	0.125	0.0448614
	OTU_2269	3.72246	0.125	0.0448614
	OTU_2595	3.72246	0.125	0.0448614
	OTU_2705	3.72246	0.125	0.0448614
	OTU_2846	3.72246	0.125	0.0448614
	OTU_3047	3.72246	0.125	0.0448614
	OTU_3118	3.72246	0.125	0.0448614
	OTU_3635	3.72246	0.125	0.0448614
	OTU_1491	3.7368	0.125	0.0133806
	OTU_1346	3.75413	0.283	0.0024209
	OTU_665	3.81198	0.727	0.000120288
	OTU_1192	3.82884	0.151	0.00977798
	OTU_4053	3.82905	0.301	0.00150602
	OTU_1873	3.86042	0.74	0.00353553
	OTU_1266	3.88225	0.151	0.00282626
	OTU_2158	3.89132	0.176	0.0380765
	OTU_2793	3.89132	0.176	0.0380765
	OTU_2824	3.89132	0.176	0.0380765
	OTU_2994	3.89132	0.176	0.0380765
	OTU_3184	3.89132	0.176	0.0380765
	OTU_3740	3.89132	0.176	0.0380765
	OTU_1796	3.90838	0.176	0.00710893
	OTU_5512	3.93148	0.125	0.0304722
	OTU_884	3.94342	0.766	0.00494246
	OTU_1407	4.00643	0.352	0.00386195
	OTU_1221	4.0124	0.2	0.00369075
	OTU_2781	4.05413	0.222	0.00584811
	OTU_2802	4.05413	0.222	0.00584811
	OTU_2867	4.06952	0.222	0.0100772
	OTU_1824	4.07523	0.523	0.000128712
	OTU_4021	4.09076	0.2	0.00282499
	OTU_4540	4.1255	0.243	0.00545274
	OTU_1916	4.13271	2.497	0.000473247
	OTU_1239	4.13398	0.243	0.00347644
	OTU_1518	4.14739	0.243	0.00172594
	OTU_718	4.16976	0.383	0.00150602
	OTU_894	4.18147	0.412	0.000411681
	OTU_377	4.19704	0.938	0.00138023
	OTU_1636	4.24291	0.263	0.00416116
	OTU_3004	4.24347	0.283	0.0233921
	OTU_1622	4.25852	0.263	0.00369075
	OTU_1508	4.3025	0.452	0.00143563
	OTU_379	4.3043	1.562	0.016294
	OTU_1140	4.3281	0.301	0.00663046
	OTU_2315	4.3631	0.319	0.021037
	OTU_2322	4.3631	0.319	0.021037
	OTU_2627	4.3631	0.319	0.021037
	OTU_913	4.4419	0.489	0.000215924
	OTU_426	4.50758	0.439	0.031729
	OTU_1629	4.52164	0.523	0.0130801
	OTU_1773	4.53809	0.368	0.00167951
	OTU_2240	4.57461	0.383	0.0151196
	OTU_540	4.59048	0.684	0.000955456
	OTU_1530	4.70191	0.564	0.00017527
	OTU_3631	4.8035	0.452	0.0113527
	OTU_2503	4.8857	0.477	0.0105359
	OTU_1257	4.96681	0.489	0.000825647
	OTU_5832	5.07291	0.534	0.00843939
	OTU_204	5.14119	1.414	0.000150158
	OTU_2438	5.1468	0.554	0.000854031
	OTU_2042	5.20568	0.574	0.00700472
	OTU_1365	5.24156	0.584	0.00150602
	OTU_1402	5.29983	0.602	0.00663046
	OTU_938	5.30208	0.593	0.00381077
	OTU_679	5.37825	0.62	0.0004695
	OTU_1529	5.414	0.637	0.00558415
	OTU_507	5.82168	0.76	0.00369075
	OTU_5814	5.86287	0.772	0.00365093
	OTU_4558	6.06979	0.835	0.00306101
	OTU_1066	6.42586	0.942	0.00228173
	OTU_1593	6.46651	0.954	0.00216836
	OTU_384	7.04781	1.267	3.89966e-10
	OTU_2702	8.14863	1.461	0.0222701
	(B)
	bactrial OTUs_number	log2FC	logMeanOTUs	padj		fungal OTUs_number	log2FC	logMean OTUs	padj
	OTU_1655	-5.41499	0.523	0.00843639		OTU_39	-12.5354	3.022	1.1646e-07
	OTU_321	-5.09848	1.259	3.41274e-06		OTU_51	-11.7395	2.783	9.27912e-08
	OTU_1208	-4.85105	0.426	6.47672e-05		OTU_2077	-9.8464	2.361	1.90655e-11
	OTU_1541	-4.83348	0.352	0.0166013		OTU_79	-7.82103	2.503	1.35197e-09
	OTU_2449	-4.72066	0.319	0.01882		OTU_140	-7.79739	2.346	5.27657e-05
	OTU_1078	-4.70971	0.398	0.00187155		OTU_158	-7.62373	1.862	2.99458e-05
	OTU_919	-4.68034	0.383	0.00106041		OTU_127	-6.6723	2.155	0.00035003
	OTU_988	-4.62458	0.653	2.10064e-06		OTU_2050	-6.50355	2.014	1.79518e-07
	OTU_1666	-4.61455	0.352	0.00016861		OTU_169	-6.31252	1.804	1.33697e-08
	OTU_1741	-4.59885	0.368	0.000740807		OTU_120	-6.29592	1.174	7.01575e-18
	OTU_784	-4.58825	0.352	6.04693e-05		OTU_130	-6.05878	2.206	4.20005e-08
	OTU_2010	-4.55561	0.263	0.0296956		OTU_340	-5.95151	1.041	0.00122452
	OTU_130	-4.55467	1.647	6.88149e-09		OTU_67	-5.89144	1.202	9.53129e-17
	OTU_1186	-4.54819	0.336	0.000230278		OTU_1076	-5.67033	0.989	2.49188e-13
	OTU_1011	-4.52328	0.637	3.69614e-07		OTU_264	-5.57562	0.95	8.88551e-10
	OTU_776	-4.50144	0.921	0.000220092		OTU_31	-5.42222	2.09	3.24513e-19
	OTU_1625	-4.48319	0.301	0.000242517		OTU_163	-5.4007	1.764	5.08287e-05
	OTU_2081	-4.39969	0.301	0.000963305		OTU_466	-5.38752	0.875	0.000248943
	OTU_869	-4.35596	0.523	0.00815448		OTU_173	-5.29243	0.875	4.31335e-10
	OTU_3053	-4.29124	0.243	0.00249263		OTU_2293	-5.25739	2.838	1.76038e-06
	OTU_1466	-4.1806	0.383	0.000123357		OTU_37	-5.21403	2.151	9.74909e-12
	OTU_2152	-4.1713	0.151	0.0425306		OTU_121	-5.20312	0.845	3.54364e-10
	OTU_1515	-4.16056	0.2	0.00467414		OTU_439	-5.14339	0.802	0.000332473
	OTU_1696	-4.14071	0.176	0.00847087		OTU_84	-5.09869	1.757	2.6176e-06
	OTU_1374	-4.04098	0.151	0.00907901		OTU_344	-5.02851	0.79	0.0137969
	OTU_1470	-4.03261	0.176	0.00168967		OTU_129	-4.88387	1.409	7.07943e-23
	OTU_1127	-4.02751	0.713	0.0216371		OTU_275	-4.74958	0.692	0.000829613
	OTU_2178	-3.96402	0.097	0.0499139		OTU_181	-4.71822	1.491	2.61939e-06
	OTU_2582	-3.96402	0.097	0.0499139		OTU_291	-4.71191	0.875	0.00162501
	OTU_1353	-3.95605	0.176	0.0258684		OTU_418	-4.53393	0.661	3.87037e-05
	OTU_1814	-3.95605	0.176	0.0258684		OTU_323	-4.48615	0.79	7.31886e-07
	OTU_1921	-3.95552	0.151	0.00360738		OTU_561	-4.41703	0.584	0.00502298
	OTU_1711	-3.88423	0.151	0.0100988		OTU_195	-4.40294	1.679	6.53514e-05
	OTU_1490	-3.79587	0.125	0.00907901		OTU_279	-4.32333	0.574	1.36404e-05
	OTU_1984	-3.78425	0.097	0.00481936		OTU_2126	-4.31755	0.574	1.08726e-05
	OTU_1336	-3.77757	0.283	0.00512169		OTU_58	-4.29729	2.364	1.85537e-09
	OTU_4364	-3.70334	0.035	0.0311503		OTU_608	-4.27931	0.544	0.00183588
	OTU_1092	-3.69694	0.747	5.44496e-06		OTU_261	-4.27309	1.644	1.57879e-06
	OTU_1539	-3.66776	0.067	0.014327		OTU_689	-4.18869	0.544	0.000605901
	OTU_634	-3.6249	0.637	2.07725e-05		OTU_314	-4.1693	0.554	0.0028374
	OTU_1478	-3.60866	0.067	0.0122985		OTU_7	-4.16059	2.498	4.91369e-38
	OTU_3897	-3.59633	0.2	0.00678194		OTU_56	-4.13297	2.028	1.26364e-09
	OTU_105	-3.59186	1.886	1.40457e-26		OTU_153	-4.13228	1.091	3.18079e-12
	OTU_1327	-3.56636	0	0.0357365		OTU_57	-4.10377	2.536	4.18981e-08
	OTU_5058	-3.56636	0	0.0357365		OTU_9	-4.07685	3.526	3.99553e-13
	OTU_553	-3.54725	0.713	1.07829e-05		OTU_953	-4.07592	0.544	0.0257661
	OTU_1403	-3.53457	0.2	0.00469678		OTU_394	-4.07505	0.489	0.00336001
	OTU_1079	-3.49387	0.035	0.0250108		OTU_1047	-4.07417	0.477	0.0221944
	OTU_1480	-3.44829	0	0.0238474		OTU_336	-4.01069	0.489	3.16023e-05
	OTU_1495	-3.44829	0	0.0238474		OTU_483	-3.96542	0.465	0.000189042
	OTU_1434	-3.4167	0	0.0296956		OTU_648	-3.9303	0.439	0.00469372
	OTU_1387	-3.39728	-0.038	0.0246154		OTU_268	-3.87564	0.439	0.000187316
	OTU_1038	-3.36687	0.151	0.00888308		OTU_70	-3.86344	2.658	5.83604e-12
	OTU_1452	-3.30546	0.125	0.0237309		OTU_122	-3.8519	1.741	2.73316e-09
	OTU_809	-3.30215	0.677	0.000888749		OTU_453	-3.83654	0.439	0.00263819
	OTU_1110	-3.29453	-0.038	0.0255455		OTU_333	-3.81659	0.426	0.000289077
	OTU_1116	-3.2558	0.125	0.0342124		OTU_968	-3.81401	0.398	0.0278659
	OTU_1927	-3.18591	0.097	0.0311503		OTU_609	-3.79996	0.398	0.010906
	OTU_1831	-3.16668	0.946	0.0148979		OTU_898	-3.79382	0.398	0.0108858
	OTU_1392	-3.15959	-0.079	0.0328829		OTU_497	-3.79259	0.412	0.000484884
	OTU_999	-3.11041	0.243	0.0154565		OTU_43	-3.78968	1.918	3.65348e-18
	OTU_710	-3.06141	0.611	0.00161526		OTU_692	-3.76689	0.412	0.017939
	OTU_5925	-3.00406	1.801	2.29968e-05		OTU_518	-3.74113	0.564	0.000176698
	OTU_163	-2.99059	1.833	0.000578867		OTU_2145	-3.69855	0.398	0.00032147
	OTU_2036	-2.96716	0.035	0.0363446		OTU_812	-3.68866	0.368	0.0119024
	OTU_3277	-2.89082	0.934	7.81301e-05		OTU_1133	-3.68614	0.383	0.000640757
	OTU_1068	-2.75382	0.512	0.00249263		OTU_849	-3.675	0.398	0.00502298
	OTU_204	-2.70181	0.584	0.0414948		OTU_923	-3.55058	0.352	0.00074918
	OTU_3731	-2.55008	0.336	0.0308882		OTU_646	-3.54586	0.512	0.000455395
	OTU_620	-2.53199	0.452	0.00430199		OTU_630	-3.49209	0.336	0.000892496
	OTU_726	-2.53168	0.824	5.15703e-05		OTU_46	-3.47931	2.664	1.58412e-39
	OTU_4691	-2.5138	0.699	0.000248291		OTU_536	-3.46538	0.319	0.00101617
	OTU_330	-2.49147	0.824	0.0154807		OTU_1542	-3.46456	0.319	0.00198651
	OTU_292	-2.48675	1.363	0.00787894		OTU_347	-3.4619	0.477	0.000383725
	OTU_927	-2.46078	0.512	0.00257976		OTU_2614	-3.43987	0.319	0.00138716
	OTU_4736	-2.44759	1.339	0.00100976		OTU_273	-3.38274	0.452	0.000705964
	OTU_684	-2.41795	0.684	0.00195839		OTU_624	-3.37352	0.283	0.00472787
	OTU_2253	-2.41474	0.319	0.0303683		OTU_928	-3.35172	0.283	0.00818308
	OTU_5385	-2.39675	0.412	0.00930641		OTU_647	-3.34786	0.263	0.042438
	OTU_1125	-2.26649	0.489	0.0493915		OTU_739	-3.34786	0.263	0.042438
	OTU_979	-2.22984	0.544	0.0216882		OTU_346	-3.33677	0.283	0.00186042
	OTU_147	-2.17939	1.916	0.000330208		OTU_339	-3.32612	0.283	0.00138978
	OTU_2440	-2.16884	0.845	0.00299418		OTU_152	-3.26328	1.004	2.42886e-05
	OTU_712	-2.11582	1.224	0.028877		OTU_477	-3.25371	0.426	0.0109534
	OTU_4865	-2.1066	0.489	0.00858871		OTU_2187	-3.24908	0.412	0.001642
	OTU_1215	-2.09786	0.426	0.0357365		OTU_772	-3.23132	0.243	0.0122976
	OTU_4254	-2.07124	0.574	0.01061		OTU_352	-3.22768	0.412	0.00143135
	OTU_828	-2.07113	0.894	0.000566741		OTU_225	-3.22038	0.263	0.00742963
	OTU_293	-2.06739	1.315	1.07829e-05		OTU_927	-3.18839	0.263	0.017939
	OTU_71	-2.05312	1.939	2.2133e-08		OTU_1990	-3.17802	0.243	0.00317723
	OTU_556	-2.03925	1.067	0.00132058		OTU_85	-3.13308	1.045	1.30166e-07
	OTU_444	-2.01252	0.523	0.0101399		OTU_623	-3.12002	0.243	0.0257661
	OTU_1264	-1.97713	0.452	0.020279		OTU_771	-3.12002	0.243	0.0257661
	OTU_3418	-1.95314	0.778	0.00144002		OTU_838	-3.11576	0.523	0.0101518
	OTU_700	-1.90208	0.544	0.0136974		OTU_389	-3.0834	0.368	0.00265935
	OTU_1590	-1.89071	0.426	0.0447311		OTU_1215	-3.03664	0.2	0.0230807
	OTU_791	-1.88156	0.368	0.0437731		OTU_574	-3.01982	0.352	0.00336001
	OTU_911	-1.84898	1.496	0.0043706		OTU_463	-3.01303	1.723	0.000493706
	OTU_156	-1.83599	1.543	2.03404e-05		OTU_236	-2.99463	1.224	1.04586e-05
	OTU_1214	-1.82768	1.551	0.000254259		OTU_2144	-2.98338	0.336	0.00456037
	OTU_263	-1.79768	1.652	0.00191296		OTU_978	-2.9667	0.151	0.031585
	OTU_2896	-1.71369	1.615	2.03404e-05		OTU_2606	-2.96591	0.319	0.0280303
	OTU_431	-1.69425	1.589	0.000519908		OTU_200	-2.94177	1.542	0.0361122
	OTU_1802	-1.67503	1.527	0.000318446		OTU_577	-2.9329	0.176	0.0234353
	OTU_351	-1.67189	1.097	0.000119807		OTU_639	-2.90827	0.319	0.00516316
	OTU_115	-1.6716	2.063	0.000918846		OTU_686	-2.90292	0.151	0.00856208
	OTU_892	-1.64612	0.637	0.049704		OTU_938	-2.90164	0.176	0.0267204
	OTU_588	-1.62645	0.699	0.0117547		OTU_419	-2.88149	0.76	0.00633709
	OTU_2104	-1.62569	0.813	0.00815448		OTU_528	-2.87439	0.151	0.0105219
	OTU_285	-1.61346	1.319	4.54639e-05		OTU_24	-2.86584	2.418	7.271e-32
	OTU_1904	-1.59389	0.802	0.0153102		OTU_516	-2.85539	0.151	0.0250661
	OTU_932	-1.58755	0.727	0.00843639		OTU_327	-2.85144	0.301	0.00668994
	OTU_6351	-1.5875	1.717	0.00049618		OTU_113	-2.8306	0.962	8.50689e-07
	OTU_515	-1.55822	1.141	0.0214875		OTU_1343	-2.78912	0.283	0.00947061
	OTU_381	-1.50601	0.95	0.00602098		OTU_459	-2.7863	0.796	0.0101298
	OTU_645	-1.48742	0.835	0.0234856		OTU_677	-2.78492	0.125	0.0150489
	OTU_604	-1.46872	0.611	0.0405672		OTU_402	-2.77854	0.727	0.0103974
	OTU_2127	-1.46518	1.247	0.0144858		OTU_494	-2.76654	0.097	0.0310832
	OTU_328	-1.46404	1.368	0.000187915		OTU_33	-2.76537	0.097	0.0421407
	OTU_435	-1.44153	1.226	0.00145933		OTU_1314	-2.76537	0.097	0.0421407
	OTU_729	-1.43763	0.989	0.00467414		OTU_982	-2.75087	0.125	0.0276221
	OTU_4331	-1.40197	0.946	0.00601883		OTU_423	-2.72212	1.128	0.0133469
	OTU_57	-1.37776	2.285	4.17445e-14		OTU_458	-2.66943	0.097	0.0253739
	OTU_191	-1.36419	1.623	0.00217632		OTU_717	-2.66398	0.243	0.0211376
	OTU_561	-1.34428	1.004	0.00325511		OTU_1331	-2.65078	0.097	0.035283
	OTU_345	-1.3389	1.011	0.0155632		OTU_53	-2.65004	1.962	5.05229e-17
	OTU_378	-1.33424	1.181	0.000888749		OTU_14	-2.64465	2.562	3.38058e-14
	OTU_547	-1.32654	1.064	0.014719		OTU_36	-2.64155	2.638	8.8219e-21
	OTU_149	-1.32075	1.786	0.00164276		OTU_470	-2.51335	0.035	0.0260893
	OTU_45	-1.31969	2.262	0.000777293		OTU_487	-2.51335	0.035	0.0260893
	OTU_4831	-1.29273	1.691	0.0116626		OTU_1262	-2.50891	0.2	0.035283
	OTU_90	-1.29262	1.879	0.000187915		OTU_432	-2.50633	0.802	0.00627866
	OTU_259	-1.2821	1.437	6.05561e-05		OTU_573	-2.50459	0.035	0.0257661
	OTU_3474	-1.27892	2.252	3.05506e-08		OTU_2555	-2.50459	0.035	0.0257661
	OTU_388	-1.26363	1.128	0.0214875		OTU_371	-2.47687	0.62	0.00606554
	OTU_103	-1.25181	1.936	9.90507e-11		OTU_649	-2.46757	0.2	0.035283
	OTU_418	-1.25034	1.217	0.0051832		OTU_13	-2.32432	1.954	1.35767e-06
	OTU_5063	-1.24496	1.826	0.0248842		OTU_124	-2.32298	1.607	0.000109944
	OTU_125	-1.24091	1.958	0.00172862		OTU_18	-2.32033	2.28	3.3435e-07
	OTU_23	-1.23535	2.529	0.00815448		OTU_282	-2.28711	0.916	0.000924297
	OTU_434	-1.21809	1.347	0.0384819		OTU_570	-2.26671	-0.038	0.0485997
	OTU_3354	-1.21449	1.181	0.0060357		OTU_2519	-2.25054	0.934	0.0257661
	OTU_787	-1.21126	0.76	0.0398781		OTU_160	-2.19639	1.164	8.98989e-05
	OTU_386	-1.20826	1.671	7.00323e-05		OTU_365	-2.19099	0.628	0.0162741
	OTU_4739	-1.19944	1.507	0.000674965		OTU_134	-2.18161	1.807	0.0334101
	OTU_408	-1.18695	0.894	0.0289395		OTU_316	-2.11362	0.62	0.00809168
	OTU_393	-1.16595	1.29	0.0264421		OTU_262	-2.10263	0.929	0.0023342
	OTU_402	-1.16585	1.178	0.00437594		OTU_196	-2.0843	0.87	0.00108953
	OTU_486	-1.15709	0.903	0.0325772		OTU_565	-2.03535	0.489	0.0249606
	OTU_647	-1.14857	1.19	0.00334903		OTU_508	-2.01868	0.489	0.0221345
	OTU_1585	-1.14562	1.845	0.0426457		OTU_425	-2.01011	0.84	0.000574234
	OTU_296	-1.14366	1.855	2.32863e-06		OTU_2763	-1.97742	0.584	0.0273645
	OTU_586	-1.10185	0.942	0.0397529		OTU_492	-1.97249	0.653	0.0377776
	OTU_641	-1.0996	2.369	0.00284927		OTU_224	-1.92618	1.371	0.0423129
	OTU_4	-1.09859	3.15	0.0120489		OTU_199	-1.90412	1.296	0.00411842
	OTU_154	-1.08807	2.136	0.00513953		OTU_1622	-1.90209	1.097	8.98989e-05
	OTU_56	-1.08777	1.878	0.000154035		OTU_242	-1.89453	1.648	3.26277e-07
	OTU_353	-1.08247	0.875	0.040915		OTU_789	-1.87403	2.082	0.00138978
	OTU_235	-1.07301	1.724	0.00161526		OTU_80	-1.84543	1.082	0.000502153
	OTU_3320	-1.06205	1.051	0.0243539		OTU_256	-1.84255	1.073	0.0163099
	OTU_243	-1.0605	1.342	0.0417053		OTU_211	-1.83679	1.288	0.00138978
	OTU_497	-1.051	1.224	0.0208994		OTU_2235	-1.83353	0.628	0.0193204
	OTU_20	-1.05021	2.759	7.6354e-05		OTU_269	-1.81466	0.829	0.0374323
	OTU_788	-1.04789	0.87	0.0475811		OTU_363	-1.77281	0.602	0.0153484
	OTU_226	-1.04763	1.357	0.000256134		OTU_760	-1.75663	1.648	0.000212829
	OTU_270	-1.04758	1.243	0.0307077		OTU_2319	-1.74322	0.661	0.0129934
	OTU_167	-1.04239	1.965	0.00109586		OTU_4	-1.71586	3.516	1.30052e-09
	OTU_83	-1.04161	2.145	0.00146183		OTU_16	-1.68856	2.248	6.97227e-10
	OTU_526	-1.04066	1.729	0.0164769		OTU_35	-1.65703	2.69	0.00131376
	OTU_1702	-1.03849	1.81	0.00235935		OTU_469	-1.63908	0.574	0.0269531
	OTU_112	-1.03793	2.013	0.00667508		OTU_2579	-1.61493	0.79	0.0118499
	OTU_214	-1.0282	1.638	0.000162852		OTU_241	-1.56008	1.103	0.0111987
	OTU_523	-1.02225	1.082	0.0145732		OTU_233	-1.5443	1.245	0.00352059
	OTU_254	-1.02024	1.621	1.08993e-05		OTU_93	-1.51542	1.416	0.0361482
	OTU_550	-1.00471	1.409	0.000704818		OTU_417	-1.48863	1.125	0.00512006
	OTU_1565	-1.0046	1.2	0.00847087		OTU_32	-1.40689	2.517	0.0421407
	OTU_524	-1.00175	0.954	0.0275736		OTU_90	-1.33672	1.822	0.00947061
	OTU_4145	-0.990001	2.696	0.0169237		OTU_175	-1.32097	1.267	0.0250661
	OTU_26	-0.971478	2.319	4.12836e-09		OTU_47	-1.2704	2.176	3.31425e-08
	OTU_350	-0.967635	1.379	0.00734292		OTU_331	-1.25036	0.921	0.0102581
	OTU_2381	-0.965799	1.497	0.000544722		OTU_973	-1.21569	1.108	0.0200843
	OTU_274	-0.956639	1.737	0.00408216		OTU_168	-1.20376	1.595	0.031585
	OTU_1269	-0.954672	1.021	0.026767		OTU_301	-1.18797	1.064	0.035283
	OTU_5745	-0.94241	1.204	0.0100305		OTU_159	-1.17933	1.088	0.0157271
	OTU_5319	-0.939598	1.587	0.00104514		OTU_117	-1.17335	1.021	0.0181317
	OTU_137	-0.925396	1.758	7.74833e-05		OTU_38	-1.0507	2.114	1.71954e-05
	OTU_494	-0.922287	1.297	0.0155946		OTU_157	-0.925619	1.061	0.0256945
	OTU_135	-0.914079	2.179	0.00106041		OTU_23	0.81139	2.611	0.0244545
	OTU_5038	-0.911765	1.108	0.0246154		OTU_3	0.812284	3.257	0.0101009
	OTU_74	-0.91137	2.523	0.0106993		OTU_924	0.883514	1.249	0.0485997
	OTU_77	-0.882965	1.704	0.0384819		OTU_149	0.956076	1.405	0.000530834
	OTU_286	-0.877062	1.587	0.0458449		OTU_749	1.0718	0.855	0.0256945
	OTU_121	-0.876462	2.382	0.000289123		OTU_143	1.0948	1.334	0.0151772
	OTU_40	-0.876137	2.028	0.0154807		OTU_150	1.10699	1.332	0.0330283
	OTU_2597	-0.872001	1.363	0.0214875		OTU_10	1.13862	2.879	1.19317e-07
	OTU_155	-0.864287	1.595	0.000777293		OTU_248	1.20075	0.628	0.0377122
	OTU_3132	-0.849079	2.066	0.00122421		OTU_289	1.26737	0.855	0.00469372
	OTU_60	-0.843123	2.097	0.0248842		OTU_353	1.2898	0.564	0.0485997
	OTU_308	-0.835416	1.355	0.0105281		OTU_467	1.40477	0.452	0.0361482
	OTU_249	-0.823349	1.341	0.0243539		OTU_305	1.5997	1.011	0.0107903
	OTU_1953	-0.821876	1.326	0.0486915		OTU_91	1.63034	1.491	0.0076076
	OTU_1222	-0.815801	1.374	0.0434911		OTU_758	1.64597	0.544	0.0172329
	OTU_1070	-0.80968	1.706	0.0275736		OTU_491	1.74211	0.383	0.0302009
	OTU_142	-0.805796	2.712	0.0424238		OTU_125	1.74438	1.103	0.00074918
	OTU_38	-0.805679	2.489	6.89375e-05		OTU_373	1.81905	0.398	0.0465793
	OTU_211	-0.782973	1.77	0.00106041		OTU_161	1.83437	1.462	1.6563e-09
	OTU_169	-0.757488	1.471	0.00847087		OTU_45	1.85483	1.439	1.65126e-06
	OTU_592	-0.737371	1.577	0.00751907		OTU_490	1.89091	0.368	0.0133164
	OTU_50	-0.718648	2.673	0.0338562		OTU_400	1.95787	0.426	0.0495311
	OTU_233	-0.715946	1.794	0.0319184		OTU_1125	2.01612	0.176	0.0404256
	OTU_323	-0.702581	1.421	0.0153102		OTU_105	2.02757	1.448	0.00296139
	OTU_2242	-0.692983	1.355	0.0166013		OTU_328	2.06034	0.523	0.0423634
	OTU_131	-0.689063	1.97	4.21743e-05		OTU_379	2.11472	0.452	0.00164699
	OTU_2	-0.661875	3.041	0.00794653		OTU_504	2.15941	0.352	0.047622
	OTU_55	-0.653324	2.503	0.0122985		OTU_19	2.19811	1.936	0.0423129
	OTU_32	-0.620455	2.071	0.0288748		OTU_231	2.19882	0.813	4.1946e-05
	OTU_16	-0.614301	3.003	0.0398781		OTU_222	2.23178	0.95	4.39727e-07
	OTU_140	-0.610146	1.858	0.0349069		OTU_259	2.27664	1.054	0.00999671
	OTU_4375	-0.606121	2.207	0.000264073		OTU_26	2.28223	2.103	0.0404256
	OTU_2087	-0.587335	2.02	0.0060357		OTU_338	2.33241	0.95	0.0256945
	OTU_1445	-0.558589	2.138	0.00696818		OTU_249	2.35006	0.84	1.79518e-07
	OTU_153	-0.489446	1.823	0.0312888		OTU_202	2.37378	1.041	0.0160306
	OTU_403	-0.479096	1.668	0.0305529		OTU_265	2.39044	0.938	0.00138978
	OTU_1372	-0.433022	1.9	0.0423479		OTU_208	2.3917	0.74	0.0107473
	OTU_51	0.444341	2.629	0.000174761		OTU_429	2.40806	0.412	0.0170033
	OTU_29	0.476224	2.582	0.00109586		OTU_322	2.4157	0.176	0.0273645
	OTU_158	0.48632	2.129	0.0243539		OTU_284	2.4445	0.439	0.000939879
	OTU_102	0.50273	2.306	0.000888749		OTU_218	2.49165	1.108	0.00749466
	OTU_39	0.521827	2.468	0.00109586		OTU_644	2.51557	0.2	0.017939
	OTU_5	0.555631	2.838	0.00260536		OTU_102	2.53384	1.648	0.000511334
	OTU_750	0.569323	1.908	0.00666296		OTU_136	2.55447	1.575	0.0199923
	OTU_133	0.582895	2.036	0.0166013		OTU_204	2.57239	1.206	0.000586048
	OTU_307	0.586737	1.743	0.0411868		OTU_673	2.59573	0.125	0.0256945
	OTU_224	0.595967	1.74	0.0450562		OTU_349	2.59754	1.035	0.00101617
	OTU_34	0.621763	2.53	0.0479896		OTU_1282	2.63472	0.383	0.0284914
	OTU_705	0.641544	1.763	0.00305936		OTU_123	2.67078	1.279	4.78162e-05
	OTU_85	0.673428	2.588	0.000419991		OTU_250	2.69294	0.916	1.33697e-08
	OTU_455	0.67363	1.489	0.0477506		OTU_495	2.69427	0.383	0.000455395
	OTU_126	0.681029	1.889	0.0078139		OTU_116	2.70775	1.667	0.00072336
	OTU_360	0.68184	1.788	0.000344468		OTU_380	2.73358	0.398	0.00452852
	OTU_24	0.684368	2.153	0.00124882		OTU_272	2.74393	0.802	2.48568e-07
	OTU_283	0.695083	1.522	0.0243498		OTU_645	2.75044	-0.125	0.0397277
	OTU_446	0.701375	1.619	0.00334903		OTU_342	2.7679	0.706	5.88843e-05
	OTU_447	0.711565	2.465	0.0219877		OTU_711	2.80316	0.512	0.000666862
	OTU_3229	0.724779	1.589	0.0233653		OTU_276	2.87563	0.706	0.00138814
	OTU_144	0.725398	2.063	1.07829e-05		OTU_306	2.89809	0.889	0.020441
	OTU_984	0.749724	2.058	0.000704818		OTU_59	2.90896	2.166	0.00373156
	OTU_489	0.750254	2.478	0.000777293		OTU_81	2.91027	1.883	0.0200843
	OTU_66	0.752057	1.957	0.000108693		OTU_154	2.91355	1.386	0.00155087
	OTU_36	0.760487	2.633	1.09469e-11		OTU_294	2.94564	0.76	0.0154167
	OTU_349	0.767785	1.609	0.0243539		OTU_343	2.95033	0.784	0.020197
	OTU_61	0.770892	2.354	0.00421456		OTU_903	2.95577	0.176	0.0170033
	OTU_106	0.775319	2.052	0.0198493		OTU_61	2.98052	2.197	0.00386254
	OTU_118	0.787346	1.997	0.00751907		OTU_799	2.9947	-0.234	0.0490105
	OTU_4585	0.793399	1.892	0.00129586		OTU_139	2.99651	0.766	0.000473497
	OTU_326	0.809914	1.953	0.00469678		OTU_278	3.00584	-0.234	0.0251162
	OTU_338	0.817205	1.785	0.00724151		OTU_1226	3.03072	0.534	0.0196895
	OTU_162	0.85403	1.742	0.0137458		OTU_435	3.05415	0.584	0.00236475
	OTU_367	0.858053	1.297	0.0259114		OTU_115	3.0785	1.817	3.03397e-05
	OTU_5473	0.867028	2.271	0.0104318		OTU_520	3.09579	1.265	0.000289077
	OTU_88	0.871083	2.323	0.00226486		OTU_493	3.10666	0.477	0.00295941
	OTU_193	0.887295	2.159	0.0119555		OTU_337	3.12138	0.593	2.46957e-05
	OTU_225	0.887798	1.995	0.000454896		OTU_357	3.14863	1.166	0.0211874
	OTU_5827	0.90081	1.558	0.000318446		OTU_422	3.15865	0.489	0.00183419
	OTU_643	0.906009	1.695	0.0107993		OTU_30	3.15876	2.83	0.000737321
	OTU_325	0.925282	1.389	0.0426746		OTU_20	3.175	3.095	0.00110041
	OTU_356	0.931894	1.422	0.00858871		OTU_668	3.20497	-0.38	0.0257661
	OTU_4100	0.988912	1.536	0.0435529		OTU_700	3.20497	-0.38	0.0257661
	OTU_207	0.994054	1.732	0.0334452		OTU_29	3.21322	2.699	0.000699019
	OTU_714	0.995231	1.842	0.00861483		OTU_359	3.22404	0.62	2.81137e-06
	OTU_81	1.01329	2.238	0.000419991		OTU_635	3.2257	0.319	0.0355346
	OTU_201	1.01737	1.757	0.00481936		OTU_1299	3.23866	-0.176	0.035283
	OTU_329	1.01989	1.117	0.00853927		OTU_281	3.30869	0.283	0.00106659
	OTU_468	1.03743	1.279	0.0234856		OTU_75	3.31207	1.306	1.16884e-06
	OTU_139	1.06172	2.04	2.42162e-06		OTU_177	3.35104	1.097	8.03439e-09
	OTU_503	1.06835	1.041	0.0422163		OTU_569	3.36755	0.398	0.0146922
	OTU_170	1.07333	1.765	0.00134335		OTU_240	3.38802	1.476	0.000518701
	OTU_601	1.07387	0.921	0.0238474		OTU_185	3.39408	0.035	0.014133
	OTU_1243	1.07482	1.515	0.0189344		OTU_505	3.43419	0.713	4.9031e-05
	OTU_187	1.08337	1.498	0.0243539		OTU_247	3.43919	0.564	6.06368e-07
	OTU_91	1.08364	2.341	0.000105593		OTU_602	3.46456	-0.301	0.0145317
	OTU_5943	1.10385	0.938	0.0198493		OTU_1390	3.46571	1.041	4.1946e-05
	OTU_533	1.1177	0.894	0.0439513		OTU_413	3.46652	0.319	0.000207346
	OTU_181	1.12065	1.633	0.000112996		OTU_780	3.46913	-0.301	0.0144775
	OTU_116	1.1254	1.538	0.000123357		OTU_450	3.47517	-0.301	0.0269531
	OTU_664	1.13402	1.154	0.00360738		OTU_547	3.47517	-0.301	0.0269531
	OTU_9	1.13723	3.206	0.0066325		OTU_1088	3.47517	-0.301	0.0269531
	OTU_2061	1.14001	2.522	0.00421512		OTU_556	3.4949	-0.301	0.014133
	OTU_3305	1.14282	1.253	0.000418535		OTU_387	3.51674	-0.301	0.0138894
	OTU_1003	1.14379	1.439	0.00106041		OTU_368	3.54192	0.523	2.67435e-06
	OTU_4623	1.14686	1.414	0.00594402		OTU_34	3.54685	2.802	1.00637e-08
	OTU_587	1.15898	0.903	0.0194415		OTU_298	3.57946	0.602	4.06235e-05
	OTU_574	1.15942	1.577	0.0437731		OTU_488	3.58465	-0.079	0.0070217
	OTU_1597	1.16193	1.349	0.000199802		OTU_197	3.58793	1.224	0.00187696
	OTU_313	1.18537	0.88	0.0472679		OTU_132	3.59917	2.02	0.000202991
	OTU_512	1.18766	1.23	0.00149718		OTU_411	3.60478	1.13	1.57737e-05
	OTU_670	1.19317	1.46	0.000566741		OTU_206	3.6428	1.648	0.00101617
	OTU_333	1.19681	1.368	0.0243539		OTU_12	3.68139	0.824	3.10874e-07
	OTU_731	1.20342	1.174	0.00304617		OTU_434	3.69179	-0.234	0.00994981
	OTU_52	1.20562	2.319	2.32863e-06		OTU_887	3.72188	-0.234	0.00780847
	OTU_1113	1.21788	0.84	0.0399218		OTU_372	3.7224	-0.234	0.0211376
	OTU_205	1.21834	1.572	0.000406239		OTU_377	3.7224	-0.234	0.0211376
	OTU_171	1.23543	1.972	0.0349069		OTU_770	3.7224	-0.234	0.0211376
	OTU_4043	1.24528	1.45	2.29968e-05		OTU_1127	3.7224	-0.234	0.0211376
	OTU_21	1.26096	2.535	1.20522e-07		OTU_255	3.72932	0.747	7.32514e-07
	OTU_177	1.26858	1.558	0.0216371		OTU_317	3.73383	0.383	0.00025155
	OTU_262	1.27121	1.38	0.00041192		OTU_119	3.73475	1.865	0.030567
	OTU_2179	1.27128	1.822	2.03404e-05		OTU_542	3.73656	-0.038	0.00510356
	OTU_368	1.27747	1.519	0.00016861		OTU_522	3.74234	-0.234	0.00982195
	OTU_3042	1.29025	1.418	7.34123e-05		OTU_1794	3.74234	-0.234	0.00982195
	OTU_1572	1.30633	1.281	0.0104709		OTU_2670	3.74234	-0.234	0.00982195
	OTU_546	1.30937	1.091	0.0399218		OTU_1052	3.87089	0	0.000821822
	OTU_28	1.31352	2.471	2.44462e-12		OTU_141	3.93035	1.631	1.79672e-26
	OTU_420	1.32418	1.222	0.0420624		OTU_486	3.93881	-0.176	0.00543879
	OTU_702	1.33024	0.899	0.00688675		OTU_137	3.97968	1.376	5.10968e-07
	OTU_168	1.34244	1.817	0.0136533		OTU_631	3.98474	0.554	0.000440732
	OTU_2767	1.35542	1.672	0.000119807		OTU_496	4.01241	-0.125	0.0160916
	OTU_514	1.35692	1.2	0.0181935		OTU_545	4.04436	-0.125	0.00430125
	OTU_1967	1.37595	1.748	0.000138269		OTU_167	4.05545	1.74	0.00138716
	OTU_280	1.38014	1.422	0.000186191		OTU_406	4.05632	0.574	5.17837e-08
	OTU_341	1.38626	1.146	0.00223326		OTU_480	4.06737	-0.125	0.00282255
	OTU_4863	1.38893	1.217	0.0078139		OTU_253	4.0782	0.835	1.22308e-12
	OTU_436	1.39306	1.544	0.000187915		OTU_403	4.08684	-0.125	0.00286984
	OTU_924	1.39606	0.903	0.00958166		OTU_862	4.09119	1.275	1.22308e-12
	OTU_793	1.39739	0.76	0.0274399		OTU_86	4.09783	1.471	2.77917e-08
	OTU_222	1.40884	1.594	0.0382822		OTU_708	4.12398	0.067	0.00642681
	OTU_602	1.41884	0.669	0.0360447		OTU_258	4.12411	0.243	0.0107461
	OTU_182	1.42042	0.921	0.0029011		OTU_27	4.12809	2.108	3.24716e-09
	OTU_867	1.42204	1.336	0.00849257		OTU_21	4.19974	3.154	0.0193204
	OTU_138	1.42811	1.644	0.000369588		OTU_148	4.26274	1.025	6.21671e-09
	OTU_672	1.42887	0.772	0.0163163		OTU_696	4.28395	-0.079	0.00411842
	OTU_3997	1.43318	1.499	0.000187915		OTU_998	4.29592	-0.038	0.0119219
	OTU_344	1.43408	1.668	2.77876e-08		OTU_1323	4.29592	-0.038	0.0119219
	OTU_541	1.45053	0.807	0.0293331		OTU_1037	4.3062	2.524	2.82418e-07
	OTU_230	1.45347	1.048	0.0179504		OTU_397	4.32014	0.645	1.27772e-08
	OTU_3778	1.45349	2.503	0.0184409		OTU_446	4.34867	0.753	0.00224285
	OTU_340	1.47091	1.344	0.0186433		OTU_726	4.35393	-0.038	0.000207346
	OTU_4153	1.47206	1.563	1.79242e-05		OTU_755	4.35473	-0.038	0.00206175
	OTU_449	1.47998	1.306	0.00532661		OTU_63	4.38471	1.913	4.11644e-08
	OTU_3805	1.49312	1.241	0.00161526		OTU_858	4.41368	0.151	0.000303511
	OTU_320	1.50578	1.571	0.00209334		OTU_145	4.42358	1.629	8.29069e-05
	OTU_219	1.51936	2.177	0.00161526		OTU_209	4.59274	0.352	0.00216888
	OTU_5021	1.5194	1.368	0.00198813		OTU_69	4.60579	0.035	0.00436339
	OTU_1368	1.53395	1.267	0.0145732		OTU_481	4.60579	0.035	0.00436339
	OTU_1020	1.53473	0.885	0.0232634		OTU_592	4.60579	0.035	0.00436339
	OTU_792	1.53637	0.637	0.0479896		OTU_11	4.61167	3.171	0.0010182
	OTU_1766	1.53876	1.297	2.03404e-05		OTU_2042	4.64743	0.222	6.53514e-05
	OTU_777	1.54119	0.747	0.0107993		OTU_54	4.65786	2.458	2.16166e-05
	OTU_246	1.55767	1.74	0.00164276		OTU_187	4.66929	0.85	0.000279443
	OTU_2102	1.57613	0.564	0.0429556		OTU_533	4.67238	0.222	3.97497e-06
	OTU_653	1.57713	0.778	0.0354711		OTU_531	4.67474	0.222	0.000149419
	OTU_213	1.58898	2.049	0.000888749		OTU_774	4.68563	0.067	0.000120158
	OTU_1954	1.59763	1.305	0.0139589		OTU_1627	4.68638	2.043	9.0573e-09
	OTU_412	1.60297	1.094	0.0107993		OTU_40	4.69288	1.829	7.98362e-06
	OTU_1251	1.61133	2.651	0.00664704		OTU_454	4.71916	0.067	0.000261058
	OTU_2283	1.61294	0.753	0.00815448		OTU_451	4.7297	0.243	8.34803e-05
	OTU_407	1.61322	1.329	0.0250108		OTU_246	4.75194	0.747	3.0251e-05
	OTU_64	1.62931	2.289	0.00650053		OTU_228	4.75216	0.669	1.82276e-05
	OTU_14	1.63667	2.7	0.00584557		OTU_95	4.78535	1.618	2.0596e-15
	OTU_6225	1.64149	1.563	0.000888749		OTU_207	4.78909	1.312	5.49316e-05
	OTU_265	1.64529	1.628	0.00152102		OTU_101	4.79271	1.811	3.24567e-07
	OTU_457	1.64799	1.392	0.00257976		OTU_172	4.81802	2.006	0.00138978
	OTU_229	1.66324	1.984	2.78514e-07		OTU_743	4.83418	0.125	0.00627866
	OTU_370	1.68485	1.138	0.0145886		OTU_244	4.88988	0.125	0.000164881
	OTU_1135	1.7117	0.88	0.0139589		OTU_401	4.88988	0.125	0.000164881
	OTU_310	1.71645	0.903	0.0276157		OTU_106	4.89282	1.245	9.34627e-10
	OTU_749	1.71717	1.386	0.0420702		OTU_900	4.90092	0.125	0.0023342
	OTU_440	1.72211	1.654	0.000490872		OTU_548	4.93242	0.125	0.000208175
	OTU_4575	1.72434	1.31	0.00065253		OTU_472	4.93975	0.301	0.000188241
	OTU_687	1.72769	0.677	0.0199092		OTU_598	4.94413	0.301	1.01099e-06
	OTU_1824	1.73601	0.512	0.0460294		OTU_330	4.94767	1.025	0.000552231
	OTU_1897	1.74367	0.916	0.00787894		OTU_515	4.97714	0.151	0.000176698
	OTU_288	1.74453	1.528	0.000330208		OTU_510	4.9946	0.125	0.00707505
	OTU_568	1.75091	0.885	0.00268608		OTU_664	5.01812	0.151	0.0001637
	OTU_422	1.755	1.504	0.00059237		OTU_238	5.07274	1.438	0.00174221
	OTU_886	1.78208	0.85	0.0429556		OTU_405	5.07677	0.176	0.00216888
	OTU_373	1.80977	1.638	0.00246254		OTU_378	5.07902	0.176	6.53514e-05
	OTU_1076	1.81907	0.72	0.0477809		OTU_468	5.08108	0.2	0.00564046
	OTU_267	1.82545	0.954	0.0411868		OTU_511	5.08108	0.2	0.00564046
	OTU_336	1.8285	1.521	0.000187915		OTU_530	5.13684	0.2	2.27576e-06
	OTU_1230	1.83755	0.699	0.00843639		OTU_983	5.15296	0.2	1.56481e-05
	OTU_551	1.84213	1.366	0.000220092		OTU_98	5.17503	0.962	1.27421e-06
	OTU_122	1.89899	2.018	0.0276157		OTU_334	5.18152	0.802	5.15074e-08
	OTU_798	1.90868	0.669	0.0477153		OTU_585	5.28085	0.243	1.63362e-05
	OTU_841	1.91993	0.713	0.0466642		OTU_288	5.29672	1.503	0.000694507
	OTU_727	1.93995	0.79	0.0120489		OTU_564	5.31722	0.412	6.83106e-06
	OTU_981	1.94929	0.452	0.0310203		OTU_165	5.3831	0.426	2.3305e-07
	OTU_2812	1.9768	0.778	0.00156534		OTU_49	5.50191	2.424	0.000664946
	OTU_359	1.98194	1.561	1.79242e-05		OTU_576	5.55908	0.336	0.000160349
	OTU_1237	1.98975	0.523	0.0127333		OTU_229	5.56412	3.053	0.00177512
	OTU_43	1.99055	2.13	0.00108609		OTU_296	5.61631	0.336	4.58636e-07
	OTU_1394	2.00063	0.829	0.0104709		OTU_350	5.63668	0.368	0.00263819
	OTU_874	2.02664	0.908	7.74833e-05		OTU_114	5.6729	2.17	0.00317723
	OTU_104	2.04325	1.726	0.0425306		OTU_68	5.7067	2.388	0.00427386
	OTU_417	2.05208	0.84	0.00431441		OTU_103	5.78157	1.327	7.32514e-07
	OTU_180	2.05239	1.892	0.00130141		OTU_449	5.7897	0.398	1.51501e-05
	OTU_926	2.05612	0.593	0.0105182		OTU_355	5.80406	0.554	2.2563e-06
	OTU_210	2.05643	1.569	9.45698e-07		OTU_409	5.83077	0.426	0.00263819
	OTU_717	2.06792	0.813	0.00106939		OTU_17	5.90327	3.12	0.000436158
	OTU_419	2.11281	1.665	0.000407346		OTU_188	5.93203	1.426	4.50371e-08
	OTU_160	2.11464	1.906	0.00145933		OTU_441	5.97421	0.439	1.08726e-05
	OTU_516	2.12064	0.766	0.000289123		OTU_257	5.99658	0.465	1.68322e-06
	OTU_438	2.15204	1.62	0.00100976		OTU_2393	6.01515	0.426	0.0031432
	OTU_914	2.17069	0.778	0.000210973		OTU_822	6.11498	1.612	2.23368e-08
	OTU_679	2.17626	0.734	0.0411868		OTU_408	6.15234	0.477	8.92976e-05
	OTU_1298	2.21222	0.452	0.0162623		OTU_283	6.42686	0.584	1.87443e-06
	OTU_1390	2.2198	0.383	0.0411868		OTU_341	6.46365	0.76	6.08593e-07
	OTU_1421	2.23485	0.383	0.0357365		OTU_183	6.62569	0.807	6.42561e-06
	OTU_268	2.25994	1.382	9.45698e-07		OTU_83	6.73108	0.669	1.56994e-06
	OTU_1841	2.26551	0.477	0.0142228		OTU_230	6.82294	0.706	3.72795e-11
	OTU_2663	2.30748	1.59	5.15703e-05		OTU_5	7.09284	3.563	7.74629e-06
	OTU_2796	2.33842	0.489	0.0189344		OTU_135	7.11524	0.79	3.87661e-05
	OTU_1025	2.37295	0.554	0.00266342		OTU_313	7.14221	1.363	1.56481e-05
	OTU_651	2.38294	0.807	0.00151819		OTU_28	7.27228	3.396	0.00124081
	OTU_824	2.40315	1.085	0.0029011		OTU_128	7.40334	1.419	2.05072e-05
	OTU_563	2.40431	1.171	0.00592518		OTU_78	7.44899	1.685	1.27733e-08
	OTU_958	2.44701	0.489	0.017047		OTU_74	7.60118	0.938	7.32514e-07
	OTU_1343	2.46908	0.352	0.0191046		OTU_226	7.86261	1.011	5.10968e-07
	OTU_2870	2.47362	0.439	0.0155946		OTU_104	7.99628	2.036	8.25808e-07
	OTU_802	2.52479	0.921	0.000762552		OTU_237	8.57206	1.251	1.63362e-05
	OTU_977	2.53116	0.534	0.0066325		OTU_2	15.073	3.77	7.07468e-10
	OTU_5707	2.5382	0.602	0.00438041
	OTU_915	2.55483	0.829	0.000888749
	OTU_242	2.57798	1.717	2.92184e-05
	OTU_1246	2.58621	0.554	0.00804951
	OTU_1468	2.68825	0.501	0.00266342
	OTU_429	2.74566	1.605	6.54783e-05
	OTU_552	2.76544	1.014	0.00106041
	OTU_1456	2.78076	0.62	0.00896431
	OTU_1067	2.79489	0.885	0.0420624
	OTU_894	2.8043	0.677	0.0107405
	OTU_949	2.83508	0.439	0.00877524
	OTU_1871	2.87057	0.894	4.21743e-05
	OTU_748	2.9099	0.564	0.0181536
	OTU_3202	2.95215	0.2	0.0349069
	OTU_5764	2.95928	0.611	0.0184639
	OTU_1060	2.97771	0.035	0.0368602
	OTU_825	2.99723	0.501	0.00568803
	OTU_2131	3.04171	0.067	0.0306862
	OTU_630	3.07163	1.031	0.000529311
	OTU_1731	3.07186	0.86	0.00272715
	OTU_1575	3.07679	0.067	0.0234856
	OTU_319	3.13909	0.574	0.0348105
	OTU_527	3.2335	0.283	0.0111285
	OTU_1245	3.23719	0.125	0.0226153
	OTU_2032	3.26866	0.301	0.0360447
	OTU_1192	3.31006	-0.038	0.0189344
	OTU_1229	3.31006	-0.038	0.0189344
	OTU_3543	3.31155	0.125	0.0154807
	OTU_779	3.31364	0.661	2.11439e-05
	OTU_549	3.34156	0.125	0.0216371
	OTU_4216	3.34563	0.319	0.0145886
	OTU_1130	3.36224	0.151	0.0470827
	OTU_3266	3.3651	-0.038	0.0360447
	OTU_872	3.37633	0.584	0.00133458
	OTU_441	3.3766	1.125	0.00109873
	OTU_5695	3.3851	0.151	0.0107993
	OTU_1033	3.38911	0	0.0238474
	OTU_1656	3.38911	0	0.0238474
	OTU_2397	3.38911	0	0.0238474
	OTU_1620	3.40743	0	0.0300925
	OTU_819	3.4076	0.84	7.34123e-05
	OTU_1530	3.41993	0	0.0239191
	OTU_2116	3.44812	0	0.0137571
	OTU_2802	3.52068	0.035	0.0121605
	OTU_1330	3.53792	0.035	0.0333889
	OTU_445	3.54492	1.151	7.34765e-07
	OTU_1419	3.57976	0.035	0.00987667
	OTU_3492	3.58143	0.2	0.0153102
	OTU_2948	3.60497	0.222	0.00305936
	OTU_989	3.61665	0.067	0.0126385
	OTU_1377	3.61665	0.067	0.0126385
	OTU_3916	3.68863	0.243	0.0066325
	OTU_572	3.72225	0.097	0.0101289
	OTU_925	3.72227	0.243	0.00858871
	OTU_1512	3.73991	0.263	0.00594402
	OTU_1366	3.74604	0.283	0.0240541
	OTU_671	3.75425	1.048	7.74833e-05
	OTU_2175	3.76853	0.125	0.0329202
	OTU_1267	3.7775	0.283	0.00488579
	OTU_4481	3.78399	0.283	0.00442864
	OTU_1156	3.83519	0.125	0.00346664
	OTU_2009	3.87268	0.151	0.0101289
	OTU_2215	3.87268	0.151	0.0101289
	OTU_2024	3.88523	0.151	0.0102004
	OTU_3201	3.90491	0.151	0.00678194
	OTU_1385	3.91092	0.151	0.00850115
	OTU_1454	3.9118	0.319	0.002514
	OTU_4565	4.01104	0.176	0.00266342
	OTU_1057	4.02512	0.176	0.00520667
	OTU_796	4.02982	0.772	6.05561e-05
	OTU_2387	4.0539	0.2	0.00255513
	OTU_1961	4.11468	0.222	0.00641192
	OTU_4199	4.12217	0.336	0.0066325
	OTU_1916	4.14784	2.528	0.000289123
	OTU_1694	4.20807	0.398	0.00346544
	OTU_1492	4.22314	0.263	0.0154807
	OTU_1595	4.22314	0.263	0.0154807
	OTU_2311	4.22314	0.263	0.0154807
	OTU_2492	4.25534	0.263	0.00203543
	OTU_2472	4.26161	0.243	0.000519908
	OTU_1175	4.3111	0.283	0.00400186
	OTU_543	4.33853	0.222	0.0356142
	OTU_1850	4.34972	0.452	0.00100308
	OTU_1881	4.37089	0.301	0.00188089
	OTU_2088	4.38931	0.301	0.00197311
	OTU_482	4.40734	0.263	0.0060357
	OTU_1491	4.67847	0.398	0.00180815
	OTU_913	4.69092	0.554	0.000334002
	OTU_1573	4.74375	0.412	0.000376843
	OTU_1431	4.77798	0.426	0.000713705
	OTU_1373	4.79638	0.426	0.000220092
	OTU_822	4.84903	0.584	3.69614e-07
	OTU_1663	4.92857	0.477	0.00552518
	OTU_1514	4.93124	0.465	0.000123357
	OTU_4425	5.58874	0.677	0.0018978
	(C)
	bactrial OTUs_number	log2FC	logMeanOTUs	padj		fungal OTUs_number	log2FC	logMean OTUs	padj
	OTU_439	-7.38039	1.404	0.000164221		OTU_2614	-8.16829	1.253	2.77496e-13
	OTU_2758	-5.52218	1	2.07494e-10		OTU_51	-7.93773	1.315	1.59336e-05
	OTU_42	-5.32108	2.648	4.23628e-05		OTU_344	-7.85521	1.181	8.76084e-06
	OTU_4865	-5.17201	0.727	2.39216e-05		OTU_158	-7.78536	1.161	0.00202896
	OTU_776	-5.07648	0.72	1.16344e-06		OTU_79	-7.25971	1.125	2.45728e-09
	OTU_710	-4.90724	0.684	0.000605654		OTU_2077	-7.21169	1.108	4.59704e-10
	OTU_105	-4.73518	1.174	1.33435e-11		OTU_7	-6.89078	3.794	1.26566e-18
	OTU_1108	-4.67331	0.611	0.000287337		OTU_121	-6.88195	2.308	0.000740851
	OTU_521	-4.64396	0.544	0.00305383		OTU_2050	-6.7054	1.833	9.71872e-07
	OTU_606	-4.5385	1.297	0.00372294		OTU_80	-6.61657	1.568	1.75942e-07
	OTU_1578	-4.37173	0.523	0.00552221		OTU_76	-6.5637	2.466	6.19471e-06
	OTU_1170	-4.23844	0.637	0.00720136		OTU_25	-6.47275	3.015	5.75549e-30
	OTU_1405	-4.1925	0.465	0.00197061		OTU_1059	-6.45858	0.753	6.86153e-05
	OTU_1378	-4.18114	0.465	0.00386527		OTU_84	-6.17988	0.669	1.02759e-05
	OTU_6	-4.16609	2.592	7.35541e-05		OTU_48	-6.03473	1.171	5.85161e-18
	OTU_912	-4.10162	0.426	0.000138325		OTU_286	-5.86996	1.391	0.00169203
	OTU_3395	-3.99411	0.383	0.000149147		OTU_1410	-5.86804	0.574	0.00126667
	OTU_330	-3.91306	1.423	0.000115425		OTU_67	-5.77974	2.639	7.76734e-05
	OTU_2243	-3.89404	0.383	0.0368305		OTU_205	-5.74018	0.523	3.60316e-05
	OTU_1296	-3.80066	0.661	0.0227152		OTU_120	-5.62484	2.263	0.00431572
	OTU_3574	-3.79916	0.319	0.0189747		OTU_37	-5.58156	2.44	1.77163e-07
	OTU_1178	-3.79195	0.336	0.00200477		OTU_973	-5.57715	0.477	3.35102e-08
	OTU_130	-3.77971	1.679	0.000712626		OTU_877	-5.33209	0.412	0.00876505
	OTU_408	-3.72804	1.235	3.29882e-08		OTU_586	-5.28808	0.554	0.00916863
	OTU_1006	-3.72505	0.489	0.0426516		OTU_714	-5.27422	0.523	0.00484262
	OTU_1701	-3.7153	0.452	0.000439508		OTU_323	-5.20204	0.352	0.000528493
	OTU_3266	-3.69412	0.301	0.00103247		OTU_31	-5.12004	1.989	9.81959e-28
	OTU_1942	-3.67933	0.319	0.0479779		OTU_2207	-5.09697	0.336	0.0011942
	OTU_2241	-3.67933	0.319	0.0479779		OTU_2579	-5.039	1.447	9.42062e-06
	OTU_1608	-3.66651	0.301	0.0104922		OTU_463	-5.02284	2.348	0.00200619
	OTU_5335	-3.53801	0.243	0.00305383		OTU_32	-4.95506	3.095	1.94814e-06
	OTU_2480	-3.4805	0.243	0.0152054		OTU_64	-4.95236	1.593	0.00213663
	OTU_3175	-3.4805	0.243	0.0152054		OTU_8	-4.9255	3.367	2.47407e-05
	OTU_885	-3.42993	0.222	0.00381916		OTU_155	-4.90112	0.263	0.000575487
	OTU_758	-3.40656	0.222	0.0114114		OTU_173	-4.81594	1.748	0.00532323
	OTU_1749	-3.39777	0.368	0.0110322		OTU_417	-4.81103	0.243	0.000400199
	OTU_2516	-3.39139	0.222	0.0245559		OTU_1213	-4.78068	2.367	1.394e-07
	OTU_2592	-3.39139	0.222	0.0245559		OTU_423	-4.73158	0.222	2.16295e-05
	OTU_654	-3.36768	0.2	0.00758115		OTU_730	-4.59612	0.2	0.0181111
	OTU_1011	-3.36768	0.2	0.00758115		OTU_403	-4.47723	0.772	0.0149607
	OTU_1867	-3.36098	0.2	0.0268609		OTU_285	-4.47216	0.151	0.00164026
	OTU_1311	-3.35322	0.2	0.0218493		OTU_607	-4.46731	0.151	0.0204299
	OTU_1574	-3.34106	0.523	0.0174429		OTU_627	-4.4666	0.151	0.00600349
	OTU_1983	-3.29372	0.176	0.0106913		OTU_2766	-4.44892	0.807	0.00117618
	OTU_1468	-3.22973	0.151	0.00720136		OTU_646	-4.43538	0.125	0.00197492
	OTU_639	-3.22737	0.835	1.20122e-05		OTU_39	-4.42988	0.706	3.41528e-07
	OTU_2836	-3.1657	0.125	0.0419985		OTU_260	-4.4178	0.908	0.0205388
	OTU_2318	-3.16173	0.151	0.0345379		OTU_104	-4.40139	2.079	0.00811161
	OTU_1194	-3.13438	0.125	0.0108155		OTU_572	-4.38542	0.125	0.000407159
	OTU_791	-3.12872	0.439	0.00201306		OTU_57	-4.37499	2.009	3.35102e-08
	OTU_1751	-3.11717	0.097	0.0404293		OTU_571	-4.34699	0.097	0.0034934
	OTU_812	-3.11606	0.125	0.0123636		OTU_352	-4.34461	1.161	0.00233836
	OTU_4254	-3.0847	0.097	0.0398031		OTU_153	-4.34286	2.069	0.000641937
	OTU_557	-3.0322	0.263	0.00856478		OTU_518	-4.23306	0.067	0.00246377
	OTU_875	-3.00152	0.097	0.0328611		OTU_758	-4.22307	0.067	0.00209357
	OTU_500	-2.98439	0.855	1.49632e-05		OTU_2379	-4.21486	0.677	0.00202378
	OTU_1426	-2.93203	0.067	0.023345		OTU_196	-4.21464	0.067	0.00204581
	OTU_530	-2.91761	0.067	0.0425788		OTU_801	-4.21464	0.067	0.00204581
	OTU_1030	-2.91413	0.243	0.0452914		OTU_658	-4.16742	0.383	0.00145734
	OTU_3320	-2.9022	1.038	7.38301e-06		OTU_374	-4.16583	0.222	0.00236338
	OTU_1238	-2.89663	0.067	0.0382316		OTU_806	-4.1468	0.222	0.028417
	OTU_1313	-2.89663	0.067	0.0382316		OTU_532	-4.11461	0.035	0.00118481
	OTU_1683	-2.89663	0.067	0.0382316		OTU_425	-4.09326	1.079	0.00369041
	OTU_4313	-2.85453	0.222	0.0301595		OTU_237	-4.06037	0.653	0.0236795
	OTU_1716	-2.85337	0.035	0.0256443		OTU_546	-4.05884	0.352	0.00484262
	OTU_1198	-2.81761	0.2	0.0192485		OTU_840	-4.05884	0.352	0.00484262
	OTU_1600	-2.81761	0.2	0.0192485		OTU_789	-4.04845	2.596	1.38494e-10
	OTU_1272	-2.76401	0.336	0.00967677		OTU_404	-4.02301	0	0.0060781
	OTU_596	-2.763	1.346	3.8528e-08		OTU_195	-4.00008	0	0.00405188
	OTU_1641	-2.67411	0.151	0.0329138		OTU_332	-3.99074	0	0.00171022
	OTU_695	-2.64309	0.772	0.0135008		OTU_36	-3.9878	2.997	2.25087e-11
	OTU_943	-2.59382	-0.038	0.0477812		OTU_431	-3.98383	0	0.00580132
	OTU_2725	-2.58434	0.301	0.0337261		OTU_339	-3.97939	1.465	0.0219031
	OTU_1336	-2.58413	0.125	0.0473528		OTU_853	-3.97461	0.151	0.0186127
	OTU_353	-2.56861	1.253	7.62559e-06		OTU_389	-3.97294	0	0.00169203
	OTU_1728	-2.53856	0.283	0.0256802		OTU_303	-3.96195	0	0.008526
	OTU_1075	-2.5347	0.283	0.0318094		OTU_179	-3.92772	0.699	0.00431572
	OTU_1906	-2.5347	0.283	0.0318094		OTU_241	-3.90297	0.72	8.26032e-08
	OTU_1454	-2.48889	0.263	0.0285715		OTU_939	-3.89764	0.151	0.0369034
	OTU_1474	-2.48028	0.534	0.0125969		OTU_535	-3.86168	-0.038	0.00243917
	OTU_523	-2.47654	1.091	0.00107379		OTU_1189	-3.83699	-0.038	0.0370885
	OTU_2165	-2.4722	0.747	0.00191739		OTU_117	-3.77065	2.154	1.08252e-06
	OTU_4331	-2.45428	1.025	4.94777e-07		OTU_439	-3.74945	0.097	0.0057037
	OTU_4763	-2.44583	1.164	3.04831e-06		OTU_508	-3.73256	0.097	0.00484262
	OTU_5063	-2.42043	1.094	2.63079e-06		OTU_1990	-3.7285	-0.079	0.00947809
	OTU_835	-2.40645	0.243	0.0339907		OTU_458	-3.71688	-0.079	0.0052189
	OTU_2002	-2.35014	0.222	0.044179		OTU_43	-3.71363	2.448	6.23506e-05
	OTU_3838	-2.29741	0.602	0.0473528		OTU_2145	-3.70128	1.245	0.00683623
	OTU_249	-2.27913	1.504	4.31095e-12		OTU_282	-3.69382	0.727	3.28616e-06
	OTU_6225	-2.25111	1.303	1.89188e-07		OTU_2349	-3.69167	0.72	0.00328454
	OTU_830	-2.23431	0.544	0.0212187		OTU_14	-3.65149	3.25	4.76993e-18
	OTU_577	-2.22575	0.699	0.00091905		OTU_947	-3.60505	-0.125	0.0155435
	OTU_2083	-2.18278	0.925	1.64878e-05		OTU_16	-3.57886	3.21	2.99323e-46
	OTU_734	-2.18191	0.439	0.0254689		OTU_419	-3.57811	-0.125	0.0126104
	OTU_2620	-2.18106	0.72	0.0168976		OTU_470	-3.57811	-0.125	0.0126104
	OTU_6054	-2.17798	1.213	0.00249509		OTU_753	-3.57811	-0.125	0.0126104
	OTU_294	-2.1757	1.073	9.25119e-06		OTU_127	-3.54869	-0.125	0.0494173
	OTU_1022	-2.16545	0.692	0.0284063		OTU_745	-3.54869	-0.125	0.0494173
	OTU_806	-2.15416	0.534	0.00950459		OTU_979	-3.54869	-0.125	0.0494173
	OTU_1437	-2.14599	0.554	0.0146906		OTU_921	-3.5462	-0.125	0.0153488
	OTU_5759	-2.14267	0.677	0.00358494		OTU_346	-3.53599	1.174	0.0219031
	OTU_460	-2.13478	0.908	0.00195275		OTU_418	-3.52481	-0.125	0.0494383
	OTU_578	-2.12271	0.86	0.00289071		OTU_1262	-3.47948	0.2	0.032291
	OTU_5105	-2.11629	1.332	0.000109531		OTU_159	-3.4051	1.868	0.00134104
	OTU_351	-2.10174	1.183	3.29905e-05		OTU_638	-3.40352	-0.176	0.0244648
	OTU_115	-2.08537	1.854	1.64637e-06		OTU_271	-3.36247	0.865	0.000144056
	OTU_553	-2.07602	0.653	0.0243045		OTU_347	-3.24034	0.903	0.000842631
	OTU_837	-2.06122	0.894	0.000941331		OTU_279	-3.23368	0.544	2.92303e-05
	OTU_1285	-2.0548	0.889	0.000206218		OTU_597	-3.22858	-0.234	0.0319638
	OTU_381	-2.04869	0.894	0.000303185		OTU_698	-3.22858	-0.234	0.0319638
	OTU_243	-2.04435	1.171	0.00399605		OTU_706	-3.22858	-0.234	0.0319638
	OTU_241	-2.03989	1.553	1.19592e-05		OTU_1047	-3.22858	-0.234	0.0319638
	OTU_358	-2.02532	0.653	0.0366121		OTU_56	-3.20839	2.339	0.00068879
	OTU_725	-2.00769	1.007	3.05036e-05		OTU_1068	-3.20838	-0.234	0.0214666
	OTU_467	-2.00129	1.144	0.00136928		OTU_172	-3.19022	0.097	0.0338523
	OTU_54	-1.99396	1.326	8.87339e-10		OTU_1542	-3.18348	-0.234	0.0323674
	OTU_174	-1.98386	1.37	2.98196e-05		OTU_385	-3.14828	0.097	0.00708095
	OTU_434	-1.97797	0.938	0.00194201		OTU_169	-3.13516	0.74	0.00689315
	OTU_378	-1.97597	1.088	2.23738e-06		OTU_269	-3.10035	0.829	0.00126667
	OTU_3761	-1.97171	0.677	0.013633		OTU_2556	-3.08384	0.727	0.00311862
	OTU_1147	-1.96924	0.74	0.00122208		OTU_163	-3.05584	0.802	0.0142205
	OTU_87	-1.96272	2.125	0.0223355		OTU_534	-3.03472	0.067	0.0162509
	OTU_620	-1.95933	0.954	0.000300184		OTU_277	-3.0226	1.306	3.60316e-05
	OTU_56	-1.95567	2.097	0.000473417		OTU_224	-3.02139	0.067	0.0206936
	OTU_472	-1.93671	1.025	0.0100841		OTU_521	-2.99385	-0.301	0.0496574
	OTU_1416	-1.9323	0.778	0.00627356		OTU_210	-2.99135	1.556	0.000198644
	OTU_300	-1.92939	1.365	0.000108272		OTU_492	-2.98441	-0.301	0.0496574
	OTU_677	-1.92226	0.477	0.0223355		OTU_499	-2.98441	-0.301	0.0496574
	OTU_293	-1.9055	1.085	0.00155033		OTU_2173	-2.98441	-0.301	0.0496574
	OTU_1130	-1.88778	0.554	0.0447859		OTU_4	-2.98015	2.836	9.76627e-06
	OTU_775	-1.87589	0.602	0.0152964		OTU_336	-2.97283	0.319	0.00520856
	OTU_77	-1.87514	1.981	1.62709e-05		OTU_122	-2.97239	2.063	0.00391527
	OTU_3729	-1.8719	0.84	0.00100512		OTU_487	-2.95308	0.942	0.0475988
	OTU_1213	-1.8706	0.611	0.00858827		OTU_181	-2.90894	1.13	0.00556475
	OTU_1480	-1.86303	0.465	0.035999		OTU_225	-2.89623	1.409	0.0186127
	OTU_724	-1.84641	0.829	0.000956778		OTU_1302	-2.88493	0.921	0.0027089
	OTU_374	-1.84241	1.202	0.000594565		OTU_256	-2.88048	0.301	0.00562788
	OTU_544	-1.83919	1.475	0.000177876		OTU_18	-2.84247	2.959	0.015261
	OTU_1013	-1.82549	0.452	0.0327344		OTU_314	-2.81688	0.439	0.00078905
	OTU_613	-1.80183	0.74	0.00358494		OTU_327	-2.75737	0.645	0.000662072
	OTU_321	-1.79983	0.796	0.00247119		OTU_333	-2.74891	1.018	0.000144263
	OTU_1157	-1.79982	0.534	0.0342783		OTU_316	-2.70815	1.004	0.00266862
	OTU_367	-1.78982	1.091	0.000509629		OTU_130	-2.6604	1.401	0.00193363
	OTU_616	-1.78612	1.007	0.00258353		OTU_321	-2.65027	1.154	0.0417452
	OTU_1954	-1.77681	0.813	0.00167443		OTU_199	-2.58043	1.076	0.00520856
	OTU_4994	-1.77104	0.512	0.0268609		OTU_760	-2.52144	1.846	0.0123945
	OTU_1579	-1.7509	1.667	5.23271e-07		OTU_2519	-2.5141	0.784	1.9263e-05
	OTU_4736	-1.73899	1.43	0.00738916		OTU_58	-2.47901	2.055	0.000295495
	OTU_1214	-1.72897	1.503	7.85737e-06		OTU_33	-2.47711	0.383	0.0276302
	OTU_156	-1.7258	1.564	2.58816e-05		OTU_1249	-2.46258	0.2	0.0251652
	OTU_709	-1.7251	0.802	0.0269585		OTU_129	-2.4523	1.832	0.00332453
	OTU_1048	-1.6959	1.909	3.51127e-07		OTU_138	-2.43513	1	0.00102193
	OTU_3829	-1.69499	0.921	0.000393472		OTU_453	-2.41269	0.336	0.00807771
	OTU_165	-1.6924	2.051	6.52827e-07		OTU_24	-2.37	2.661	1.02682e-13
	OTU_728	-1.67569	0.661	0.0214921		OTU_46	-2.35977	2.098	1.04902e-10
	OTU_328	-1.65135	1.247	6.89885e-05		OTU_393	-2.34721	0.319	0.0186127
	OTU_3215	-1.64583	0.544	0.0445971		OTU_746	-2.34426	0.465	0.013132
	OTU_497	-1.64308	0.784	0.00332682		OTU_308	-2.33401	0.584	0.000735408
	OTU_1188	-1.63242	0.875	0.0234036		OTU_160	-2.33203	1.669	0.00310312
	OTU_5773	-1.62969	0.929	0.00133144		OTU_273	-2.32449	1.235	0.00250753
	OTU_2379	-1.62411	0.554	0.0382316		OTU_577	-2.25719	0.301	0.0316683
	OTU_147	-1.6215	1.86	7.69343e-05		OTU_9	-2.25697	2.671	0.0030762
	OTU_2242	-1.6152	0.899	0.00101705		OTU_201	-2.20362	0.661	0.00767021
	OTU_881	-1.61281	0.554	0.0424058		OTU_152	-2.16972	0.602	0.00975093
	OTU_892	-1.6022	0.544	0.0392875		OTU_192	-2.16197	1.418	9.95484e-05
	OTU_3204	-1.59577	1.265	6.89885e-05		OTU_402	-2.15063	0.584	0.00325338
	OTU_648	-1.57675	0.684	0.0127676		OTU_93	-2.10633	1.768	0.00297268
	OTU_2381	-1.56583	1.716	7.68463e-07		OTU_100	-2.10359	1.522	0.000122388
	OTU_4839	-1.56234	1.581	0.000923559		OTU_1622	-2.09827	0.824	0.000871215
	OTU_2896	-1.55413	1.226	4.00987e-06		OTU_2555	-2.04587	1.014	0.00485209
	OTU_634	-1.55194	0.86	0.00285678		OTU_53	-1.99444	2.174	3.83174e-15
	OTU_5745	-1.54911	1.314	7.61533e-05		OTU_555	-1.96287	0.611	0.00411017
	OTU_90	-1.54014	1.799	1.77208e-06		OTU_931	-1.90481	1.243	0.0379543
	OTU_971	-1.53333	0.796	0.00798206		OTU_38	-1.83935	2.63	0.00392549
	OTU_456	-1.5326	1.128	0.000105157		OTU_386	-1.7946	0.383	0.0266378
	OTU_167	-1.52831	1.701	7.09997e-07		OTU_924	-1.76375	0.574	0.0081402
	OTU_301	-1.5263	1.058	0.000618355		OTU_2126	-1.7512	0.95	0.0123945
	OTU_5319	-1.51177	1.151	0.00296769		OTU_300	-1.7371	1.339	0.0283001
	OTU_324	-1.49015	1.051	0.00227885		OTU_268	-1.73033	1.224	0.03671
	OTU_95	-1.49013	2.203	2.45138e-09		OTU_124	-1.69152	1.501	0.00121913
	OTU_6298	-1.47727	1.327	0.00593672		OTU_242	-1.68532	1.379	0.00975093
	OTU_152	-1.47623	1.202	0.000761341		OTU_324	-1.68106	0.439	0.0326113
	OTU_104	-1.47571	0.62	0.0327344		OTU_191	-1.66325	1.502	0.00485209
	OTU_71	-1.46857	1.801	2.69925e-10		OTU_90	-1.57388	1.38	0.039483
	OTU_26	-1.46259	2.363	6.0821e-10		OTU_113	-1.51656	1.495	0.0241693
	OTU_719	-1.45039	0.829	0.0239098		OTU_236	-1.49108	0.978	0.0425314
	OTU_60	-1.44858	2.421	6.10295e-09		OTU_70	-1.39787	1.655	0.00562788
	OTU_2060	-1.42525	1.094	0.039699		OTU_35	-1.27114	2.26	0.0196246
	OTU_3354	-1.41659	1.188	0.000289433		OTU_299	-1.26234	1.067	0.0238641
	OTU_2127	-1.41588	0.982	0.0155623		OTU_55	0.814783	2.349	0.0140739
	OTU_632	-1.41532	0.76	0.0138126		OTU_66	0.880099	2.311	0.0237153
	OTU_524	-1.4137	0.692	0.0275397		OTU_149	0.962525	1.993	0.0317446
	OTU_254	-1.40474	1.547	6.05202e-08		OTU_247	1.0725	1.103	0.0338523
	OTU_235	-1.39969	1.528	0.0049754		OTU_105	1.1085	1.801	0.0399029
	OTU_289	-1.3531	1.647	0.000223688		OTU_270	1.18208	0.929	0.043031
	OTU_644	-1.35307	0.813	0.0420791		OTU_101	1.2203	1.74	0.00805164
	OTU_153	-1.35173	1.558	3.06197e-05		OTU_216	1.22397	1.668	0.0196471
	OTU_163	-1.34345	1.308	8.21294e-05		OTU_249	1.2419	1.141	0.00429141
	OTU_5743	-1.33255	0.934	0.00635749		OTU_353	1.24847	0.894	0.0265145
	OTU_568	-1.32144	0.85	0.0488344		OTU_281	1.30257	0.829	0.0228562
	OTU_968	-1.30595	0.699	0.031495		OTU_41	1.31066	2.675	0.0391693
	OTU_183	-1.30553	1.764	2.24439e-07		OTU_97	1.32215	2.056	0.0241411
	OTU_661	-1.30221	0.903	0.0160152		OTU_507	1.34152	0.829	0.0272074
	OTU_3474	-1.30088	2.018	5.80057e-09		OTU_110	1.42628	1.697	0.0176067
	OTU_4145	-1.28111	2.458	1.04617e-05		OTU_27	1.43207	2.808	0.017162
	OTU_50	-1.27908	2.167	3.31576e-09		OTU_295	1.45752	0.885	0.0134389
	OTU_388	-1.27673	0.934	0.00593672		OTU_123	1.53831	1.429	0.0471147
	OTU_145	-1.26418	1.527	1.65132e-05		OTU_383	1.55642	1.13	0.0274436
	OTU_494	-1.26108	0.97	0.00746304		OTU_88	1.56336	1.866	0.0494383
	OTU_169	-1.25426	1.722	0.00253214		OTU_411	1.61906	0.885	0.0306176
	OTU_720	-1.23631	0.978	0.0120928		OTU_359	1.73176	0.661	0.0125188
	OTU_296	-1.23377	1.404	0.000439508		OTU_141	1.76094	0.996	0.04217
	OTU_861	-1.22133	1.456	4.79636e-06		OTU_382	1.77482	0.727	0.045285
	OTU_2308	-1.20651	1.505	0.0139047		OTU_345	1.81745	1.058	0.0323674
	OTU_57	-1.19814	2.257	0.0109388		OTU_102	1.82528	1.663	0.000400118
	OTU_100	-1.19377	1.741	2.66738e-05		OTU_291	1.89407	1.224	0.00807291
	OTU_481	-1.18737	0.86	0.044179		OTU_467	1.90651	0.602	0.0318206
	OTU_478	-1.17624	0.734	0.0420791		OTU_255	1.92146	0.84	0.0302628
	OTU_226	-1.16944	1.392	0.00328809		OTU_375	1.94294	0.818	0.00171022
	OTU_212	-1.16192	1.359	0.00407736		OTU_590	1.96255	0.653	0.0384203
	OTU_83	-1.15259	1.917	8.1224e-05		OTU_298	1.99984	0.465	0.031393
	OTU_550	-1.14996	1.181	0.00808499		OTU_368	2.0542	1.206	0.000299225
	OTU_932	-1.1452	0.727	0.0477783		OTU_309	2.05767	0.611	0.0387121
	OTU_448	-1.13356	1.694	8.1224e-05		OTU_198	2.0859	1.322	8.76084e-06
	OTU_386	-1.13331	1.854	3.51127e-07		OTU_136	2.09606	1.585	0.0099402
	OTU_1624	-1.13317	1.322	0.0012976		OTU_161	2.09935	1.665	2.8821e-05
	OTU_418	-1.13026	0.921	0.0158015		OTU_537	2.13169	0.669	0.00659283
	OTU_401	-1.1255	1.294	0.000365166		OTU_440	2.1416	0.383	0.0330973
	OTU_3446	-1.11459	1.317	0.0013479		OTU_99	2.1947	1.847	0.0234254
	OTU_537	-1.11034	1.004	0.0277288		OTU_126	2.20224	1.415	0.0246733
	OTU_4628	-1.10097	1.628	0.000384687		OTU_259	2.21311	1.076	0.028417
	OTU_259	-1.09786	1.341	0.000222145		OTU_218	2.23944	1.007	0.000299383
	OTU_20	-1.0922	2.717	4.75582e-08		OTU_334	2.26349	0.669	0.00472166
	OTU_826	-1.08897	0.954	0.0152054		OTU_397	2.3089	0.772	0.0030441
	OTU_5237	-1.05019	1.119	0.0420791		OTU_400	2.34489	0.554	0.00647076
	OTU_435	-1.04707	0.88	0.0318094		OTU_154	2.35164	1.359	0.00171335
	OTU_963	-1.04558	1.106	0.00836167		OTU_139	2.35369	1.617	0.00405188
	OTU_317	-1.04554	1.193	0.0334454		OTU_995	2.36963	0.62	0.0101652
	OTU_135	-1.04109	1.87	1.94031e-05		OTU_204	2.38989	1.326	1.7604e-06
	OTU_6351	-1.0311	1.49	0.0205295		OTU_500	2.39116	0.611	0.0161131
	OTU_372	-1.01086	1.288	0.00441471		OTU_436	2.40448	0.885	0.015261
	OTU_140	-1.00842	1.927	9.09345e-09		OTU_19	2.43752	2.839	0.000142757
	OTU_1107	-0.994269	1.128	0.0206921		OTU_723	2.44691	0.611	0.0119928
	OTU_270	-0.981753	1.277	0.00305383		OTU_148	2.46654	1.085	0.00200619
	OTU_2975	-0.95878	1.429	0.0323026		OTU_318	2.48717	0.766	0.00140523
	OTU_6357	-0.956783	1.513	0.0233948		OTU_1627	2.54385	1.176	0.00451035
	OTU_362	-0.947832	1.404	0.0011906		OTU_526	2.54915	0.593	0.00404858
	OTU_783	-0.937456	1.551	0.0011906		OTU_207	2.55512	1.288	1.86671e-08
	OTU_1445	-0.934401	1.81	0.00181175		OTU_167	2.56816	1.011	0.00114004
	OTU_103	-0.93331	1.893	0.000655847		OTU_30	2.57759	2.294	1.27369e-06
	OTU_96	-0.932834	1.938	0.000110224		OTU_240	2.58107	0.908	0.00244843
	OTU_6239	-0.925686	1.136	0.0135008		OTU_322	2.59876	0.813	0.00405188
	OTU_214	-0.92042	1.421	0.000721694		OTU_398	2.62806	0.934	0.00297009
	OTU_354	-0.920079	1.689	0.000663343		OTU_388	2.66483	0.954	0.00541877
	OTU_689	-0.911106	1.288	0.00493906		OTU_422	2.67281	0.993	5.9217e-06
	OTU_4739	-0.903066	1.108	0.0146736		OTU_320	2.694	0.661	0.00129382
	OTU_5925	-0.901499	1.926	0.0144764		OTU_349	2.70063	0.74	0.000213486
	OTU_505	-0.869424	1.36	0.0177324		OTU_591	2.72264	0	0.0423138
	OTU_352	-0.856056	1.392	0.012608		OTU_1166	2.73403	-0.038	0.0319638
	OTU_269	-0.847556	1.846	0.0081545		OTU_739	2.76026	0.336	0.0215874
	OTU_65	-0.845991	2.272	0.000613175		OTU_356	2.78694	1.108	0.0110905
	OTU_38	-0.835095	2.327	9.01764e-15		OTU_540	2.84148	1.211	0.00171335
	OTU_1372	-0.821526	1.949	1.62112e-05		OTU_197	2.84296	1.412	0.00228102
	OTU_191	-0.820499	1.409	0.00216905		OTU_454	2.92307	1.011	0.00622159
	OTU_323	-0.816527	1.368	0.00437338		OTU_137	2.97251	1.763	0.00176515
	OTU_79	-0.815353	1.845	0.000370797		OTU_1001	2.98221	0	0.0252247
	OTU_80	-0.810532	1.781	0.000318233		OTU_437	2.9832	0.62	0.0320004
	OTU_23	-0.797677	2.312	8.89014e-05		OTU_882	3.02464	0.067	0.0215874
	OTU_221	-0.789598	1.54	0.00313619		OTU_569	3.04163	0.125	0.0494173
	OTU_227	-0.76787	1.67	0.0380775		OTU_858	3.05047	0.243	0.0143174
	OTU_74	-0.761928	2.231	0.00427661		OTU_936	3.08444	0.263	0.0122689
	OTU_128	-0.752808	1.585	0.0322418		OTU_2042	3.11218	0.097	0.0175121
	OTU_327	-0.748533	1.619	0.00042926		OTU_63	3.13131	1.503	3.08593e-06
	OTU_133	-0.740594	1.602	0.00204383		OTU_682	3.17146	0.925	0.00125098
	OTU_1102	-0.73828	2.244	0.0403683		OTU_981	3.17938	0.097	0.0196246
	OTU_5563	-0.737603	1.744	0.015475		OTU_61	3.18114	1.85	0.00899632
	OTU_48	-0.737381	2.358	0.00766495		OTU_29	3.1897	2.222	0.00121009
	OTU_154	-0.72125	1.887	0.0160758		OTU_1121	3.19812	0.176	0.0417452
	OTU_5328	-0.717948	1.377	0.00747794		OTU_566	3.31572	0.2	0.0409068
	OTU_113	-0.717639	1.935	0.0238567		OTU_59	3.34625	1.91	0.00209357
	OTU_62	-0.699311	2.369	0.0012976		OTU_770	3.35076	0.151	0.0140216
	OTU_84	-0.68254	1.932	0.0291843		OTU_866	3.37362	0.336	0.00254918
	OTU_4950	-0.671979	1.918	0.00951048		OTU_694	3.38448	0.176	0.00966774
	OTU_142	-0.668884	2.408	9.2007e-05		OTU_709	3.38448	0.176	0.00966774
	OTU_403	-0.663919	1.363	0.0331699		OTU_1519	3.39208	0.151	0.0176067
	OTU_2087	-0.661135	1.861	0.00155033		OTU_69	3.41251	1.011	0.00702646
	OTU_13	-0.660106	2.594	0.000358267		OTU_413	3.41257	0.125	0.0106028
	OTU_4375	-0.629355	2.078	3.62184e-05		OTU_881	3.41606	0.222	0.0103042
	OTU_126	-0.622279	1.457	0.0356137		OTU_751	3.43032	0.2	0.00649556
	OTU_239	-0.611392	1.322	0.0364541		OTU_541	3.46118	0.222	0.00647076
	OTU_155	-0.605575	1.489	0.0122456		OTU_11	3.46962	2.435	0.00010228
	OTU_51	-0.56948	2.292	0.00951538		OTU_733	3.48382	0.263	0.0277828
	OTU_29	-0.560334	2.252	0.000937588		OTU_726	3.55769	0.151	0.00975093
	OTU_37	-0.557838	2.167	0.0373587		OTU_825	3.55799	0.243	0.00683558
	OTU_1702	-0.55047	1.607	0.0199337		OTU_1390	3.57948	0.942	1.9468e-05
	OTU_307	-0.544039	1.748	0.0282258		OTU_530	3.58357	0.398	0.00326462
	OTU_1003	-0.537244	1.498	0.0277288		OTU_337	3.58407	0.222	0.00861155
	OTU_3651	-0.535938	2.343	0.0158015		OTU_659	3.66196	0.176	0.00708485
	OTU_41	-0.5282	2.242	0.0142212		OTU_405	3.67242	0.243	0.00171022
	OTU_5308	-0.52309	1.755	0.00860881		OTU_451	3.7891	0.301	0.0030762
	OTU_428	-0.506347	1.554	0.0473528		OTU_741	3.81273	0.523	0.0162509
	OTU_73	-0.501501	2.491	0.000154486		OTU_257	3.84398	0.336	0.00216799
	OTU_447	-0.499213	2.079	0.000663343		OTU_83	3.8674	1.913	0.0344518
	OTU_27	-0.480935	2.379	0.0290807		OTU_644	3.89534	0.319	0.0034934
	OTU_641	-0.462369	2.03	0.0274877		OTU_1037	3.95202	2.148	2.1809e-10
	OTU_36	-0.458879	2.228	0.0344398		OTU_1702	3.96549	0.352	0.000502493
	OTU_22	-0.429313	2.303	0.000211583		OTU_683	4.01278	0.439	0.00171335
	OTU_123	-0.401001	1.935	0.0473591		OTU_505	4.02733	0.336	0.000541111
	OTU_5473	-0.40055	1.886	0.0424778		OTU_45	4.03143	2.827	2.45728e-09
	OTU_16	-0.369946	2.659	0.000996028		OTU_623	4.03719	0.383	0.0013291
	OTU_70	0.33147	2.078	0.0368305		OTU_728	4.06791	0.383	0.0462174
	OTU_1361	0.349701	2.291	0.00432515		OTU_515	4.16744	0.412	0.0425314
	OTU_72	0.353361	2.273	0.00485641		OTU_595	4.19692	0.713	1.27369e-06
	OTU_21	0.399571	1.967	0.0168976		OTU_380	4.2143	0.645	0.010523
	OTU_3302	0.458125	1.837	0.0270599		OTU_355	4.23034	0.593	0.000544196
	OTU_414	0.524256	1.544	0.0480392		OTU_673	4.23173	0.352	0.00161837
	OTU_40	0.531066	2.229	0.0364822		OTU_687	4.23985	0.653	0.0104682
	OTU_63	0.539065	1.481	0.0491989		OTU_357	4.24611	0.439	0.000982376
	OTU_2943	0.549235	2.438	7.57774e-06		OTU_472	4.26038	0.412	0.00310312
	OTU_143	0.582378	1.491	0.0199664		OTU_710	4.26565	0.398	0.000194016
	OTU_5459	0.59272	2.506	0.00822301		OTU_1287	4.28465	0.512	0.0113818
	OTU_35	0.596774	2.271	0.00175675		OTU_278	4.34981	1.181	0.000182871
	OTU_91	0.606576	2.25	0.00858827		OTU_1030	4.37501	0.319	0.0348735
	OTU_139	0.642026	1.538	0.0155623		OTU_77	4.4123	2.083	1.03521e-07
	OTU_558	0.66015	2.427	0.000912602		OTU_296	4.41268	1.54	0.00769961
	OTU_693	0.660911	1.731	0.0279588		OTU_956	4.4866	0.352	0.0323674
	OTU_2061	0.665283	2.129	0.00172945		OTU_1454	4.4866	0.352	0.0323674
	OTU_3229	0.683644	1.748	0.0262406		OTU_75	4.5296	2.391	0.000153201
	OTU_177	0.723494	1.59	0.0404219		OTU_592	4.59792	0.512	1.51713e-05
	OTU_440	0.739977	1.297	0.025211		OTU_1029	4.6359	0.412	0.0117148
	OTU_162	0.747303	1.656	0.00225378		OTU_274	4.68352	0.593	0.0060448
	OTU_3042	0.800725	1.334	0.00302351		OTU_885	4.68888	0.637	0.00798266
	OTU_1317	0.801349	1.103	0.0307905		OTU_636	4.71635	0.412	0.0296344
	OTU_66	0.827889	1.751	0.00678661		OTU_302	4.77537	1.141	4.62576e-08
	OTU_225	0.82895	1.875	0.000182142		OTU_803	4.7756	0.426	0.0289444
	OTU_246	0.830135	1.342	0.00137746		OTU_366	4.8105	0.76	7.17724e-07
	OTU_622	0.839988	1.382	0.0280794		OTU_288	4.84136	0.628	0.000142776
	OTU_817	0.840741	1.762	0.00916626		OTU_98	4.90047	1.451	1.41683e-05
	OTU_1496	0.849789	1.371	0.00153781		OTU_306	4.91901	0.835	0.000153201
	OTU_9	0.856108	2.773	5.80988e-09		OTU_599	4.93694	0.477	0.0251652
	OTU_124	0.859419	1.061	0.0279057		OTU_769	4.93694	0.477	0.0251652
	OTU_369	0.859505	1.117	0.0152054		OTU_876	4.9907	0.523	0.00585733
	OTU_4029	0.879419	0.966	0.0313487		OTU_461	5.12327	0.684	5.40783e-07
	OTU_960	0.910927	1.598	2.49796e-05		OTU_488	5.24245	0.611	0.00062029
	OTU_4606	0.918681	1.806	0.0447017		OTU_634	5.27807	0.584	0.0186127
	OTU_122	0.920774	1.383	0.00375228		OTU_859	5.38689	0.653	0.00246377
	OTU_984	0.923976	2.1	5.15274e-06		OTU_220	5.39374	1.303	6.54425e-05
	OTU_579	0.937075	1.082	0.0155904		OTU_764	5.49009	0.661	0.00411017
	OTU_343	0.955378	2.206	2.19021e-13		OTU_312	5.53565	0.79	2.95925e-09
	OTU_31	0.956136	2.411	0.000436414		OTU_529	5.53834	0.669	0.00323438
	OTU_315	0.980068	1.217	0.00156079		OTU_135	5.63791	0.87	2.72011e-05
	OTU_338	0.982288	1.419	0.0478044		OTU_428	5.65134	0.912	2.74423e-05
	OTU_6013	1.00331	1.035	0.0076353		OTU_489	5.75902	0.72	0.014057
	OTU_2732	1.01606	2.046	0.0178798		OTU_234	5.79639	1.705	3.1984e-05
	OTU_539	1.01921	1.213	0.00261454		OTU_481	5.8453	0.903	2.33045e-12
	OTU_164	1.01985	1.366	0.000224641		OTU_784	6.00938	0.818	0.00218222
	OTU_1598	1.02722	1.859	0.0141241		OTU_625	6.03389	0.824	0.00218222
	OTU_6199	1.029	0.807	0.030522		OTU_729	6.05799	0.829	0.00218222
	OTU_157	1.04106	1.462	1.94031e-05		OTU_21	6.24548	2.089	1.04902e-10
	OTU_6007	1.05669	1.106	0.0120928		OTU_579	6.29841	0.885	0.00975093
	OTU_1054	1.06947	0.962	0.00561205		OTU_707	6.30975	0.899	0.00228102
	OTU_5384	1.09075	1.6	0.00805242		OTU_40	6.34017	1.98	1.14898e-11
	OTU_359	1.10938	1.106	0.00117607		OTU_544	6.90819	1.228	0.00078905
	OTU_4450	1.1186	1.233	0.0480392		OTU_737	7.05307	1.128	0.000816587
	OTU_438	1.12718	1.239	0.000317424		OTU_793	7.08446	1.144	0.000635134
	OTU_746	1.13007	1.427	0.0106989		OTU_603	7.22402	1.181	0.00065771
	OTU_209	1.13825	1.004	0.0473591		OTU_109	7.36047	1.379	5.62301e-06
	OTU_34	1.14305	2.492	1.10775e-07		OTU_200	7.60831	1.281	0.00120635
	OTU_256	1.14796	1.054	0.00240172		OTU_808	7.76041	1.354	0.000239487
	OTU_201	1.15061	1.386	1.38353e-05		OTU_655	7.89893	1.38	0.000400118
	OTU_1572	1.16636	0.772	0.015412		OTU_1982	7.92638	1.392	0.00033222
	OTU_517	1.17764	0.966	0.0284638		OTU_28	7.96511	1.736	1.08252e-06
	OTU_882	1.19089	1.259	0.00922043		OTU_2670	8.17572	1.473	0.000198698
	OTU_5210	1.19547	1.572	0.0239062		OTU_2205	8.5279	1.572	0.000200511
	OTU_188	1.23661	1.78	0.000290557		OTU_844	9.01768	1.725	1.09665e-05
	OTU_279	1.23995	1.2	0.00127826		OTU_1700	9.24691	2.354	8.76084e-06
	OTU_4585	1.24387	1.678	8.62092e-09		OTU_128	9.39884	2.092	1.55504e-44
	OTU_373	1.24646	1.067	0.000344197		OTU_1794	9.44705	2.652	1.00212e-07
	OTU_172	1.25183	1.792	0.00557146		OTU_12	10.5836	3.66	1.99849e-07
	OTU_5	1.25433	3.082	6.1954e-06
	OTU_361	1.25967	0.677	0.0361278
	OTU_2610	1.27699	1.222	0.00494928
	OTU_955	1.27834	1.106	0.0280794
	OTU_119	1.27845	1.267	0.000341189
	OTU_961	1.28155	0.88	0.0223355
	OTU_260	1.29378	1.589	1.0077e-05
	OTU_514	1.29488	0.813	0.00741834
	OTU_229	1.29605	1.748	9.25119e-06
	OTU_2019	1.30801	0.669	0.0284063
	OTU_1261	1.3089	0.653	0.0382809
	OTU_1090	1.31381	1.106	0.00149713
	OTU_705	1.32181	1.827	3.28208e-07
	OTU_591	1.32305	1.091	0.00630581
	OTU_873	1.35327	0.889	0.0249109
	OTU_1217	1.35329	0.713	0.0381323
	OTU_1035	1.38655	0.452	0.0498953
	OTU_1124	1.38795	0.766	0.00431214
	OTU_731	1.38883	0.929	0.00142051
	OTU_897	1.39928	1.058	0.000136181
	OTU_4043	1.40707	1.171	3.94023e-06
	OTU_3778	1.4176	2.216	0.00261697
	OTU_306	1.4177	1.136	9.73856e-05
	OTU_102	1.42177	2.682	3.07312e-08
	OTU_287	1.42661	1.265	0.00773863
	OTU_1766	1.42704	0.684	0.00942595
	OTU_567	1.42992	0.855	0.00308676
	OTU_216	1.43399	1.833	1.8513e-11
	OTU_3305	1.45294	1.23	3.51783e-06
	OTU_6228	1.47028	1.07	0.0208082
	OTU_453	1.47693	1.021	0.00027806
	OTU_1442	1.47916	1.045	0.0100188
	OTU_483	1.50147	1.1	0.000391387
	OTU_1815	1.51131	0.544	0.0458358
	OTU_1680	1.51849	1.433	9.06518e-05
	OTU_283	1.52527	1.759	7.40641e-06
	OTU_1735	1.52663	0.766	0.00358494
	OTU_224	1.53248	2.043	5.80988e-09
	OTU_915	1.53393	0.398	0.046904
	OTU_1484	1.53431	1.487	0.000324388
	OTU_1145	1.53598	0.885	0.0267119
	OTU_484	1.53633	0.677	0.0246639
	OTU_4153	1.56047	1.625	0.00247119
	OTU_848	1.5613	0.544	0.0163819
	OTU_1841	1.56173	0.72	0.0106989
	OTU_2	1.56374	3.605	0.0127676
	OTU_3401	1.56858	0.602	0.0229888
	OTU_433	1.56912	1.762	1.6035e-05
	OTU_792	1.56924	0.699	0.00754134
	OTU_68	1.57325	2.315	0.0364687
	OTU_312	1.57712	1.299	1.11354e-05
	OTU_457	1.58288	1.171	0.000109531
	OTU_1998	1.58764	1.695	0.00013589
	OTU_2179	1.63112	1.431	1.52259e-07
	OTU_437	1.6392	2.087	0.0453614
	OTU_670	1.64563	1.556	1.47243e-05
	OTU_511	1.64721	1.329	0.0449096
	OTU_391	1.64813	2.127	0.000292092
	OTU_703	1.65193	0.829	0.00113264
	OTU_581	1.66473	0.985	8.1224e-05
	OTU_811	1.66835	0.855	0.000168749
	OTU_646	1.67503	0.669	0.00193555
	OTU_1943	1.67944	0.574	0.0218733
	OTU_940	1.67944	0.398	0.0390058
	OTU_492	1.68029	1.004	0.000178526
	OTU_554	1.68469	1.303	0.00261853
	OTU_657	1.68766	0.954	2.88873e-05
	OTU_3709	1.68855	0.544	0.0135008
	OTU_983	1.69479	0.677	0.0375135
	OTU_788	1.69815	0.439	0.0195418
	OTU_706	1.70614	1.228	8.24562e-05
	OTU_733	1.70793	0.713	0.00208052
	OTU_777	1.72631	0.845	0.00383976
	OTU_1364	1.75038	0.368	0.0458329
	OTU_650	1.75431	0.946	0.00312031
	OTU_195	1.75734	1.593	1.00901e-06
	OTU_417	1.76503	0.818	0.000941331
	OTU_1420	1.77221	0.489	0.00815168
	OTU_924	1.77542	0.554	0.00593672
	OTU_671	1.77628	0.465	0.0254689
	OTU_4365	1.78226	1.864	0.000788185
	OTU_666	1.78814	1.178	0.00305383
	OTU_957	1.78879	0.72	0.00318948
	OTU_176	1.79123	1.912	1.27687e-12
	OTU_2812	1.79563	0.845	0.000427417
	OTU_1020	1.80172	0.554	0.0337194
	OTU_273	1.80713	1.355	2.4248e-12
	OTU_1116	1.8074	0.426	0.0265456
	OTU_1129	1.80805	0.544	0.0280794
	OTU_1114	1.8117	0.465	0.0327344
	OTU_601	1.81346	0.593	0.0054759
	OTU_1783	1.8203	0.628	0.00441471
	OTU_1670	1.83395	0.706	0.000662284
	OTU_1068	1.83813	0.88	0.000245018
	OTU_3655	1.84421	1.305	1.21444e-05
	OTU_244	1.85043	1.281	0.00029221
	OTU_1462	1.85364	0.574	0.00473949
	OTU_798	1.85477	0.645	0.0105078
	OTU_470	1.86563	1.429	1.04049e-05
	OTU_805	1.87294	1.19	0.00020492
	OTU_747	1.87471	0.512	0.00857842
	OTU_687	1.87506	1.004	0.000283002
	OTU_1274	1.90438	0.398	0.0150779
	OTU_1290	1.90794	0.86	0.000404369
	OTU_6222	1.91869	1.241	0.0058758
	OTU_5971	1.92179	1.523	0.000144483
	OTU_1659	1.92678	0.352	0.023345
	OTU_951	1.92923	0.62	0.00318094
	OTU_759	1.93101	0.452	0.0126225
	OTU_238	1.93126	1.692	4.75582e-08
	OTU_458	1.94115	1.031	4.74477e-06
	OTU_4165	1.94159	0.301	0.0480249
	OTU_1253	1.94935	0.602	0.0327344
	OTU_415	1.94986	1.429	4.09101e-07
	OTU_1200	1.94994	1	0.00175675
	OTU_170	1.95316	1.632	2.63072e-08
	OTU_1123	1.95346	0.802	0.00582286
	OTU_522	1.97119	1.128	5.09394e-05
	OTU_5892	1.97382	0.412	0.0205637
	OTU_247	1.97494	1.667	2.21647e-08
	OTU_364	1.97672	1.349	0.0001002
	OTU_718	1.98149	0.713	0.0150779
	OTU_4623	1.98555	1.648	4.74477e-06
	OTU_196	1.99308	1.529	6.0821e-10
	OTU_3241	1.99567	1.386	2.54548e-06
	OTU_3201	2.00319	0.512	0.00766495
	OTU_1	2.0034	4.041	1.23568e-09
	OTU_685	2.00992	0.978	0.00107379
	OTU_1516	2.01093	0.477	0.0152054
	OTU_2477	2.05491	0.534	0.0110849
	OTU_1016	2.06342	0.784	0.00578102
	OTU_1355	2.07128	0.176	0.0384999
	OTU_548	2.07879	0.942	0.0135008
	OTU_331	2.08072	0.74	0.0364822
	OTU_365	2.08279	0.628	0.00232672
	OTU_865	2.08791	1.154	1.64878e-05
	OTU_722	2.09392	0.669	0.0445971
	OTU_712	2.10854	1.259	4.00365e-12
	OTU_1173	2.11176	0.534	0.00255075
	OTU_107	2.11277	1.035	0.0294307
	OTU_6027	2.11383	1.452	3.28208e-07
	OTU_332	2.12617	1.581	2.238e-07
	OTU_1297	2.15427	0.319	0.0298908
	OTU_236	2.16714	2.047	6.0821e-10
	OTU_1058	2.16766	0.824	0.0096045
	OTU_340	2.17037	0.645	0.00016381
	OTU_1859	2.18572	0.368	0.0233974
	OTU_1111	2.1862	0.593	0.0114679
	OTU_3097	2.18814	0.772	0.000937588
	OTU_2686	2.18924	0.412	0.0255674
	OTU_6269	2.19382	0.489	0.0334454
	OTU_1032	2.19508	0.593	0.00243976
	OTU_218	2.20683	1.887	4.60323e-23
	OTU_3108	2.2082	0.753	0.0242394
	OTU_6211	2.21698	2.835	1.4309e-06
	OTU_4565	2.22093	0.982	0.00234949
	OTU_990	2.22289	0.796	0.000662284
	OTU_692	2.23348	0.85	0.00311564
	OTU_1241	2.26526	0.222	0.0334454
	OTU_1567	2.27018	0.452	0.00508674
	OTU_1352	2.27855	0.611	0.00560144
	OTU_585	2.2906	1.344	0.000543715
	OTU_3435	2.29855	0.301	0.00764692
	OTU_913	2.29885	0.319	0.0137433
	OTU_192	2.3166	1.765	2.95908e-11
	OTU_1120	2.31943	0.301	0.0083568
	OTU_1234	2.33231	0.222	0.0163656
	OTU_2774	2.36728	0.319	0.00591485
	OTU_766	2.36999	0.727	0.0016717
	OTU_2419	2.39652	0.263	0.0435368
	OTU_2865	2.39685	0.412	0.0171279
	OTU_1463	2.39999	0.412	0.00918477
	OTU_199	2.41217	1.504	5.45762e-09
	OTU_1734	2.41247	0.398	0.00531995
	OTU_1323	2.42771	0.352	0.0185156
	OTU_43	2.43595	1.88	0.00346908
	OTU_637	2.43982	1.082	0.000111379
	OTU_676	2.4431	1.136	0.00180179
	OTU_1908	2.44938	0.602	6.44492e-05
	OTU_1128	2.45603	0.699	0.0022264
	OTU_2796	2.47666	0.412	0.00136744
	OTU_801	2.49181	0.412	0.00184938
	OTU_6012	2.49622	0.176	0.017623
	OTU_584	2.50085	1.007	5.41759e-05
	OTU_267	2.51044	0.818	0.0145437
	OTU_5180	2.51074	1.245	0.000706571
	OTU_476	2.5128	0.368	0.00560144
	OTU_1345	2.5372	0.368	0.03091
	OTU_1460	2.5372	0.368	0.03091
	OTU_252	2.55426	1.708	1.28109e-06
	OTU_346	2.5624	0.946	0.000258376
	OTU_1034	2.5638	0.352	0.00372294
	OTU_1041	2.58338	0.784	0.00169945
	OTU_1106	2.60617	0.452	0.00332682
	OTU_602	2.61092	1.161	0.00746304
	OTU_1062	2.62171	1.108	1.38353e-05
	OTU_760	2.63212	0.818	3.06197e-05
	OTU_1104	2.6356	1.396	0.0205295
	OTU_2670	2.63826	0.72	1.00901e-06
	OTU_1117	2.65837	0.611	0.000223556
	OTU_910	2.66713	0.452	0.0168976
	OTU_1019	2.68797	0.465	0.00415797
	OTU_1044	2.6991	0.398	0.00188985
	OTU_958	2.70855	0.283	0.0156193
	OTU_2289	2.73036	0.263	0.0494675
	OTU_836	2.75409	0.336	0.00136744
	OTU_465	2.77007	0.908	2.22678e-05
	OTU_24	2.7794	2.655	1.16626e-21
	OTU_2416	2.78424	0.564	0.00074975
	OTU_624	2.78677	0.938	5.85161e-05
	OTU_3160	2.79071	0.263	0.039699
	OTU_479	2.791	1.103	2.77739e-06
	OTU_1476	2.8326	0.426	0.00120183
	OTU_161	2.83408	1.722	0.000211297
	OTU_1423	2.85182	0.76	0.00537211
	OTU_1132	2.86777	0	0.0436031
	OTU_1710	2.87386	0.544	0.00929099
	OTU_2532	2.88524	0.452	0.00149414
	OTU_784	2.93383	0.903	3.0559e-05
	OTU_635	2.93999	0.523	2.78329e-05
	OTU_3370	2.95038	0.477	0.000560605
	OTU_491	2.95356	1.499	8.1224e-05
	OTU_1795	2.97902	0.79	0.000542445
	OTU_1017	2.98161	0.974	0.00113264
	OTU_1750	2.98454	0.477	0.00063985
	OTU_1765	3.00234	0	0.0334454
	OTU_1801	3.0163	0.336	0.0280794
	OTU_1273	3.0233	0.489	0.000211583
	OTU_342	3.03132	1.357	0.000250829
	OTU_473	3.03192	1.149	0.00123404
	OTU_1033	3.04293	0.645	0.0106236
	OTU_1434	3.06381	0.628	9.2007e-05
	OTU_756	3.09031	0.966	4.42864e-09
	OTU_3770	3.09154	0.501	0.00353336
	OTU_732	3.12809	0.512	0.00136744
	OTU_1511	3.13414	0.439	0.00197396
	OTU_1312	3.13873	0.523	0.000100273
	OTU_3128	3.14105	0.534	0.000859923
	OTU_5449	3.16301	1.215	7.21004e-06
	OTU_2663	3.17728	1.448	0.000109531
	OTU_778	3.1932	1.784	2.30167e-10
	OTU_1202	3.19717	0.067	0.00724688
	OTU_3841	3.20723	0.706	2.24971e-07
	OTU_2417	3.2143	0.544	8.11331e-05
	OTU_594	3.22321	1.146	0.00319982
	OTU_1282	3.23098	1.301	6.39753e-18
	OTU_599	3.24829	1.079	0.000109531
	OTU_501	3.24957	1.371	1.89966e-06
	OTU_974	3.26323	0.477	0.000663839
	OTU_452	3.26759	1.466	4.08142e-20
	OTU_1169	3.29852	-0.234	0.0368964
	OTU_1431	3.29852	-0.234	0.0368964
	OTU_1733	3.29852	-0.234	0.0368964
	OTU_2185	3.29852	-0.234	0.0368964
	OTU_938	3.33946	0.398	0.000859923
	OTU_1283	3.36734	0.645	0.00203979
	OTU_3553	3.36857	-0.234	0.0357912
	OTU_1449	3.38767	0.934	1.6035e-05
	OTU_715	3.39485	-0.234	0.0407467
	OTU_1356	3.41285	0.512	3.29905e-05
	OTU_1645	3.44746	0.151	0.00398144
	OTU_3812	3.45559	1.354	5.15048e-05
	OTU_898	3.46732	0.908	2.50021e-05
	OTU_1002	3.49117	1.349	1.72728e-14
	OTU_1112	3.49338	0.426	3.29905e-05
	OTU_1331	3.50176	0.544	0.00079078
	OTU_3760	3.51016	0.176	0.0168976
	OTU_1987	3.51665	0.958	2.13798e-05
	OTU_271	3.52327	1.678	0.00029221
	OTU_1457	3.52382	0.151	0.00793542
	OTU_2217	3.55337	-0.234	0.0381323
	OTU_854	3.55975	0.637	9.60498e-06
	OTU_1685	3.57128	1.649	3.66511e-07
	OTU_527	3.61129	0.95	1.00901e-06
	OTU_1513	3.66268	-0.125	0.0129871
	OTU_4425	3.66268	-0.125	0.0129871
	OTU_1991	3.67257	0.222	0.0135008
	OTU_820	3.68094	0.661	1.6035e-05
	OTU_1446	3.7016	0.669	0.000283002
	OTU_612	3.71932	-0.176	0.0262406
	OTU_966	3.71932	-0.176	0.0262406
	OTU_4278	3.75667	1.784	2.47824e-20
	OTU_818	3.78027	0.753	5.85161e-05
	OTU_1855	3.81494	-0.079	0.00919035
	OTU_2278	3.81494	-0.079	0.00919035
	OTU_1105	3.82007	0.554	0.00751314
	OTU_953	3.83441	1.045	3.07427e-06
	OTU_931	3.84198	0.938	3.19348e-06
	OTU_2571	3.87512	-0.125	0.0169015
	OTU_1088	3.91319	0.637	8.05854e-07
	OTU_2870	3.92987	0.243	0.00191739
	OTU_973	3.94172	0.802	1.67175e-05
	OTU_1757	3.95934	0.301	0.00717864
	OTU_1040	3.97911	1.041	2.02944e-10
	OTU_1758	3.98829	-0.079	0.0103219
	OTU_1911	3.98829	-0.079	0.0103219
	OTU_3543	3.99258	0.301	0.000280876
	OTU_572	3.99871	1.058	2.32301e-05
	OTU_2926	4.02511	0.684	8.44896e-05
	OTU_909	4.06313	-0.079	0.0144124
	OTU_679	4.06905	0	0.0432204
	OTU_1375	4.07314	0	0.0085804
	OTU_1287	4.07993	0.151	0.000367089
	OTU_2130	4.08757	0.176	0.00243238
	OTU_1098	4.10322	0.176	0.00111435
	OTU_1210	4.11281	0	0.00542192
	OTU_348	4.14401	1.455	9.36513e-07
	OTU_1829	4.14665	0.2	0.0114032
	OTU_2596	4.14672	0.2	0.0122667
	OTU_925	4.16408	0	0.00358338
	OTU_1631	4.16408	0	0.00358338
	OTU_1718	4.20391	0	0.00120183
	OTU_543	4.20433	0.243	0.0276149
	OTU_485	4.20901	1.294	0.000598606
	OTU_385	4.28766	2.355	7.67247e-12
	OTU_1228	4.30145	0.067	0.00113264
	OTU_3577	4.31394	1.301	2.16722e-08
	OTU_531	4.34723	0.753	6.86317e-09
	OTU_785	4.3512	-0.038	0.0420791
	OTU_1396	4.3512	-0.038	0.0420791
	OTU_2962	4.3512	-0.038	0.0420791
	OTU_1845	4.38337	0.097	0.0262406
	OTU_1890	4.39493	0.426	0.00365003
	OTU_5624	4.39493	0.426	0.00365003
	OTU_2146	4.39974	0.263	0.000239692
	OTU_1197	4.40077	0.097	0.000839117
	OTU_2343	4.40077	0.097	0.000839117
	OTU_2387	4.42583	0.097	0.00253214
	OTU_182	4.43601	1.777	1.56034e-26
	OTU_1328	4.45593	0.125	0.0114679
	OTU_2339	4.45593	0.125	0.0114679
	OTU_2959	4.45593	0.125	0.0114679
	OTU_3182	4.45593	0.125	0.0114679
	OTU_1412	4.50583	0	0.0385682
	OTU_1136	4.5269	0.439	4.70832e-07
	OTU_4050	4.527	0.734	0.000347563
	OTU_203	4.55009	1.283	1.19788e-33
	OTU_1915	4.55308	0.097	0.000368586
	OTU_2472	4.55698	0.283	0.000113694
	OTU_1990	4.56104	0.151	0.0012976
	OTU_2840	4.56104	0.151	0.0012976
	OTU_699	4.57378	1.501	4.61631e-11
	OTU_2554	4.59686	0.151	0.00147684
	OTU_989	4.61987	0.176	0.00963872
	OTU_1862	4.61987	0.176	0.00963872
	OTU_2577	4.61987	0.176	0.00963872
	OTU_255	4.75415	2.026	5.42392e-11
	OTU_2948	4.79915	0.222	0.000230009
	OTU_1831	4.80079	0.097	0.0254689
	OTU_562	4.84799	1.751	8.79338e-09
	OTU_1591	4.86911	0.829	5.04408e-06
	OTU_2094	4.90889	0.263	0.00578102
	OTU_856	4.91602	0.125	0.0240905
	OTU_1836	4.93672	0.263	9.73856e-05
	OTU_3570	4.93672	0.263	9.73856e-05
	OTU_1487	4.97025	0.283	0.00560144
	OTU_1925	4.97025	0.283	0.00560144
	OTU_1570	4.98345	0.439	8.94954e-05
	OTU_569	5.023	0.151	0.0229888
	OTU_4199	5.023	0.151	0.0229888
	OTU_1377	5.04796	0.611	4.47139e-05
	OTU_3134	5.05607	0.301	0.000122219
	OTU_3810	5.05607	0.301	0.000122219
	OTU_1948	5.07116	0.301	7.06238e-05
	OTU_2282	5.08662	0.319	0.00509934
	OTU_1917	5.08759	0.301	3.54759e-05
	OTU_825	5.13133	0.477	2.73204e-06
	OTU_923	5.18828	1.154	1.6035e-05
	OTU_870	5.23279	0.352	1.61527e-05
	OTU_1464	5.26585	0.368	0.000265947
	OTU_1586	5.26585	0.368	0.000265947
	OTU_2397	5.29405	0.352	5.76834e-06
	OTU_2323	5.30103	0.383	0.0034917
	OTU_1159	5.32695	0.523	2.37939e-06
	OTU_4535	5.37292	0.554	1.28597e-05
	OTU_860	5.40391	1.171	7.15614e-07
	OTU_628	5.40998	0.263	0.0171865
	OTU_902	5.40998	0.263	0.0171865
	OTU_520	5.49686	1.281	1.6035e-05
	OTU_44	5.51611	2.28	2.94821e-05
	OTU_704	5.56893	0.319	0.0108635
	OTU_146	5.6624	2.12	1.01096e-12
	OTU_1119	5.72549	0.512	0.00200388
	OTU_964	5.78471	0.544	0.00107379
	OTU_1889	5.81745	0.534	3.94023e-06
	OTU_1652	5.87711	0.554	2.67044e-05
	OTU_774	5.90581	1.255	3.83651e-06
	OTU_475	5.9575	0.426	0.00885893
	OTU_1475	5.96883	0.584	0.0001002
	OTU_742	6.06799	0.766	8.01812e-05
	OTU_482	6.07269	0.465	0.00751775
	OTU_1245	6.11611	0.628	8.49686e-05
	OTU_1688	6.13645	0.637	0.0012976
	OTU_120	6.14482	1.349	8.32492e-05
	OTU_215	6.19924	0.501	0.00710707
	OTU_426	6.19924	0.501	0.00710707
	OTU_1393	6.25782	0.669	2.91335e-06
	OTU_2538	6.42139	2.38	7.87676e-06
	OTU_1674	6.43329	0.875	1.64405e-05
	OTU_1429	6.46734	0.734	5.94462e-06
	OTU_3146	6.50597	0.899	0.000573042
	OTU_319	6.54128	0.602	0.00477761
	OTU_82	6.57015	2.473	6.6876e-07
	OTU_5520	6.57909	1.652	8.1224e-05
	OTU_410	6.63386	0.628	0.0045694
	OTU_257	6.66859	0.938	0.00145027
	OTU_347	6.88425	0.706	0.00340309
	OTU_487	6.9403	0.72	0.00338582
	OTU_281	7.14605	0.784	0.00269306
	OTU_1553	7.22434	0.954	2.50106e-12
	OTU_2834	7.30569	0.985	1.00451e-08
	OTU_3	7.31086	2.74	4.79636e-06
	OTU_53	7.33026	1.82	8.5902e-05
	OTU_564	7.50108	0.889	0.00206326
	OTU_3720	7.71575	0.954	0.0219368
	OTU_681	7.79338	1.128	1.06278e-09
	(D)
	bactrial OTUs_number	log2FoldChange	logMeanOTUs	padj		fungal OTUs_number	log2FoldChange	logMean OTUs	padj
	OTU_534	-7.55189	1.472	0.0236437		OTU_280	-7.83843	1.283	2.44697e-06
	OTU_507	-7.5024	1.457	0.0238478		OTU_121	-7.16039	1.734	7.43014e-08
	OTU_530	-7.30055	1.396	0.000243153		OTU_37	-6.81855	2.676	4.28087e-25
	OTU_636	-7.10918	1.337	0.000109551		OTU_463	-6.72894	2.478	1.11375e-05
	OTU_629	-7.05926	1.324	0.0256335		OTU_173	-6.39752	0.845	2.2335e-14
	OTU_755	-6.83824	1.257	0.000103644		OTU_241	-6.24908	0.802	5.54078e-12
	OTU_1050	-6.59236	1.183	0.00239303		OTU_7	-6.15892	3.636	1.82172e-74
	OTU_204	-6.5471	1.919	0.000266408		OTU_225	-5.6994	0.637	1.26501e-06
	OTU_715	-6.50302	1.156	0.00263158		OTU_80	-5.48627	2.396	2.70476e-05
	OTU_780	-6.50302	1.156	0.00263158		OTU_2050	-5.41815	2.155	5.97356e-15
	OTU_794	-6.46035	1.144	0.00274995		OTU_152	-5.37582	2.016	1.11375e-05
	OTU_518	-6.37224	1.409	0.000318354		OTU_120	-5.30511	1.823	2.00849e-05
	OTU_868	-6.25677	1.082	0.00342964		OTU_169	-5.25743	0.653	5.47286e-05
	OTU_1085	-6.06371	1.171	0.00307469		OTU_323	-5.2403	0.501	4.11937e-05
	OTU_879	-6.0543	1.021	0.00420535		OTU_134	-5.16748	1.144	3.93969e-05
	OTU_321	-6.03588	1.161	3.40105e-07		OTU_196	-5.12935	0.465	0.000199461
	OTU_992	-5.8584	0.962	0.00519912		OTU_13	-5.12184	3.622	1.19365e-10
	OTU_1055	-5.8584	0.962	0.00519912		OTU_51	-5.02128	1	1.46813e-10
	OTU_1021	-5.79113	0.942	0.00553642		OTU_2145	-4.97084	0.574	6.27188e-06
	OTU_1006	-5.7066	0.916	0.00609658		OTU_458	-4.90837	0.398	2.22636e-06
	OTU_4322	-5.7066	0.916	0.00609658		OTU_25	-4.67758	2.75	0.000303498
	OTU_866	-5.60104	0.885	0.00686219		OTU_445	-4.64588	0.319	1.65182e-05
	OTU_377	-5.58864	1.597	0.00018021		OTU_93	-4.5998	2.224	1.24309e-10
	OTU_1280	-5.50466	0.855	0.00179021		OTU_155	-4.59047	0.611	7.88725e-07
	OTU_1022	-5.48714	0.85	0.00766116		OTU_163	-4.51774	0.283	0.000170425
	OTU_1231	-5.48714	0.85	0.00766116		OTU_85	-4.418	2.535	0.00105577
	OTU_1213	-5.46276	0.84	0.00111458		OTU_425	-4.3706	0.398	0.000259527
	OTU_1353	-5.43467	0.835	0.00817269		OTU_1076	-4.32508	0.97	4.87471e-11
	OTU_423	-5.40239	1.831	0.00018021		OTU_344	-4.28647	0.523	0.014649
	OTU_962	-5.39951	0.824	0.00837515		OTU_374	-4.25197	0.2	0.000221355
	OTU_1158	-5.39951	0.824	0.00837515		OTU_417	-4.25154	0.2	0.00053267
	OTU_1257	-5.39951	0.824	0.00837515		OTU_1990	-4.17657	0.176	0.000272286
	OTU_884	-5.30621	0.796	0.0093683		OTU_327	-4.09679	1.028	8.83721e-07
	OTU_5932	-5.30621	0.796	0.0093683		OTU_84	-4.00231	0.125	0.000793723
	OTU_358	-5.27344	1.569	3.76503e-05		OTU_389	-4.00083	0.125	0.00100934
	OTU_1039	-5.22715	0.772	0.0103347		OTU_224	-3.98315	0.125	0.0165686
	OTU_1344	-5.21813	0.766	0.00157173		OTU_107	-3.98226	1.209	2.48883e-13
	OTU_500	-5.19776	1.43	4.14181e-05		OTU_324	-3.98197	0.283	0.000286981
	OTU_1332	-5.16517	0.753	0.0107431		OTU_210	-3.97761	1.735	2.75108e-09
	OTU_1428	-5.16517	0.753	0.0107431		OTU_418	-3.91737	0.097	0.00387347
	OTU_3740	-5.16517	0.753	0.0107431		OTU_639	-3.90435	0.097	0.0013308
	OTU_130	-5.12301	1.691	1.22168e-05		OTU_43	-3.87631	2.596	0.00184732
	OTU_1166	-5.11536	1.035	0.00534396		OTU_1249	-3.8617	0.79	0.000296212
	OTU_1357	-5.07774	0.727	0.0119757		OTU_67	-3.79085	1.513	5.96966e-12
	OTU_3631	-5.07774	0.727	0.0119757		OTU_4	-3.77801	2.87	7.52622e-35
	OTU_1258	-5.03255	0.713	0.0122344		OTU_117	-3.73374	1.68	8.04423e-06
	OTU_1447	-5.03255	0.713	0.0122344		OTU_431	-3.71526	0.035	0.00258801
	OTU_1618	-5.03255	0.713	0.0122344		OTU_423	-3.70416	0.035	0.00586386
	OTU_1848	-5.03255	0.713	0.0122344		OTU_275	-3.68395	0.035	0.0268712
	OTU_5986	-5.03255	0.713	0.0122344		OTU_346	-3.68395	0.035	0.0268712
	OTU_1443	-4.96016	0.692	0.0133086		OTU_386	-3.68395	0.035	0.0268712
	OTU_1204	-4.91106	0.677	0.0137857		OTU_2235	-3.68395	0.035	0.0268712
	OTU_1706	-4.91106	0.677	0.0137857		OTU_286	-3.68282	0.2	0.00159917
	OTU_3278	-4.91106	0.677	0.0137857		OTU_58	-3.67918	2.392	0.000171373
	OTU_1413	-4.87835	0.962	0.00146829		OTU_205	-3.67461	0.2	0.0247731
	OTU_658	-4.83924	0.95	0.000113775		OTU_1483	-3.64266	0	0.0460091
	OTU_1604	-4.80615	0.645	0.015933		OTU_8	-3.60944	3.433	0.000925779
	OTU_1837	-4.80615	0.645	0.015933		OTU_419	-3.59736	0	0.0045018
	OTU_1949	-4.77838	0.637	0.0162825		OTU_536	-3.59127	0	0.00381271
	OTU_1095	-4.75237	0.628	0.00514792		OTU_297	-3.58383	0	0.00870743
	OTU_316	-4.74595	1.317	0.000113775		OTU_2751	-3.58383	0	0.00870743
	OTU_816	-4.73673	0.611	2.63844e-06		OTU_624	-3.58162	0	0.0117692
	OTU_174	-4.7235	1.919	7.55056e-06		OTU_651	-3.57784	0	0.00529719
	OTU_1617	-4.66296	0.602	0.0191868		OTU_2614	-3.56861	0.985	2.23407e-06
	OTU_4802	-4.66296	0.602	0.0191868		OTU_153	-3.54538	1.308	0.000458829
	OTU_4963	-4.66296	0.602	0.0191868		OTU_48	-3.50786	1.106	0.000149525
	OTU_810	-4.66232	0.753	0.0103517		OTU_56	-3.48292	2.318	2.30831e-05
	OTU_959	-4.603	0.574	0.00241711		OTU_36	-3.44864	2.901	1.46813e-10
	OTU_1168	-4.60238	0.584	0.0203348		OTU_553	-3.44466	0.125	0.00640441
	OTU_1679	-4.60238	0.584	0.0203348		OTU_677	-3.42356	0.125	0.00457089
	OTU_2503	-4.60238	0.584	0.0203348		OTU_127	-3.36665	-0.079	0.0288372
	OTU_2232	-4.59736	0.734	0.0176185		OTU_9	-3.36066	2.637	3.59614e-22
	OTU_625	-4.54137	0.564	0.00181248		OTU_279	-3.35876	1.549	0.000377598
	OTU_837	-4.44269	0.523	8.84717e-05		OTU_2379	-3.35606	-0.079	0.0240827
	OTU_912	-4.43615	0.534	0.024566		OTU_16	-3.3349	3.175	2.3545e-19
	OTU_1786	-4.43615	0.534	0.024566		OTU_597	-3.33356	-0.079	0.0290696
	OTU_1846	-4.43615	0.534	0.024566		OTU_539	-3.31862	-0.079	0.0190929
	OTU_1905	-4.43615	0.534	0.024566		OTU_552	-3.31862	-0.079	0.0190929
	OTU_1571	-4.3421	0.653	0.00148348		OTU_1331	-3.31862	-0.079	0.0190929
	OTU_1417	-4.3305	0.645	0.0007221		OTU_730	-3.31441	0.097	0.0111875
	OTU_553	-4.30112	0.489	0.000763499		OTU_352	-3.24517	0.74	0.00656825
	OTU_1408	-4.29815	0.645	0.0230498		OTU_18	-3.22195	2.938	0.00225948
	OTU_1303	-4.24824	0.477	0.0303077		OTU_494	-3.21677	0.067	0.0292013
	OTU_1360	-4.24824	0.477	0.0303077		OTU_14	-3.21603	3.1	9.79885e-07
	OTU_1788	-4.24824	0.477	0.0303077		OTU_1302	-3.20694	1.138	0.0017386
	OTU_2716	-4.24824	0.477	0.0303077		OTU_2579	-3.20672	1.687	0.00598147
	OTU_1699	-4.21061	0.465	0.0109432		OTU_347	-3.19055	-0.125	0.0285635
	OTU_1555	-4.16689	0.452	0.0329379		OTU_934	-3.19055	-0.125	0.0285635
	OTU_1622	-4.16689	0.452	0.0329379		OTU_756	-3.17169	-0.125	0.0285666
	OTU_2121	-4.16689	0.452	0.0329379		OTU_485	-3.16764	0.916	0.0013308
	OTU_2601	-4.16689	0.452	0.0329379		OTU_404	-3.16564	-0.125	0.0285666
	OTU_4276	-4.16689	0.452	0.0329379		OTU_1059	-3.13379	0.554	0.0257377
	OTU_152	-4.10802	1.873	6.81745e-10		OTU_2077	-3.11957	0.637	0.0179804
	OTU_1327	-4.09355	0.426	0.0130418		OTU_79	-3.05866	0.692	0.0236599
	OTU_1793	-4.09355	0.426	0.0130418		OTU_443	-3.00496	-0.176	0.0268507
	OTU_1392	-4.0327	0.412	0.00882568		OTU_122	-3.00245	1.415	2.55744e-09
	OTU_1219	-4.00453	0.398	0.0019572		OTU_39	-2.98397	0.669	2.37526e-05
	OTU_1121	-3.98653	0.398	0.0412482		OTU_130	-2.93525	1.018	1.42965e-08
	OTU_1195	-3.98653	0.398	0.0412482		OTU_129	-2.93075	2.037	0.0002116
	OTU_1525	-3.98653	0.398	0.0412482		OTU_1213	-2.92674	1.769	1.88679e-05
	OTU_1971	-3.98653	0.398	0.0412482		OTU_76	-2.86392	1.768	0.00598147
	OTU_1997	-3.98653	0.398	0.0412482		OTU_282	-2.7616	0.807	3.93969e-05
	OTU_2031	-3.98653	0.398	0.0412482		OTU_31	-2.73636	3.305	0.00921417
	OTU_2086	-3.98653	0.398	0.0412482		OTU_264	-2.69338	0.452	0.0219962
	OTU_2141	-3.98653	0.398	0.0412482		OTU_760	-2.61203	1.23	1.88679e-05
	OTU_2560	-3.98653	0.398	0.0412482		OTU_701	-2.61081	0.067	0.0438678
	OTU_3099	-3.98653	0.398	0.0412482		OTU_534	-2.58598	0.501	0.0015635
	OTU_3359	-3.98653	0.398	0.0412482		OTU_300	-2.54753	0.684	0.00428212
	OTU_2442	-3.9828	0.383	0.000595054		OTU_2556	-2.48452	0.554	0.0277717
	OTU_1523	-3.96325	0.383	0.0110392		OTU_518	-2.42594	0.383	0.0100298
	OTU_946	-3.94714	1.061	0.0207782		OTU_765	-2.41694	0.637	0.0449486
	OTU_1242	-3.93717	0.383	0.0423179		OTU_738	-2.38753	0.283	0.0311097
	OTU_1819	-3.93717	0.383	0.0423179		OTU_62	-2.3852	1.994	0.0010702
	OTU_1879	-3.93717	0.383	0.0423179		OTU_24	-2.32716	3.058	0.001191
	OTU_1994	-3.93717	0.383	0.0423179		OTU_211	-2.25767	0.727	0.00589693
	OTU_2037	-3.93717	0.383	0.0423179		OTU_113	-2.20849	2.098	0.0460475
	OTU_2193	-3.93717	0.383	0.0423179		OTU_70	-2.08077	1.556	1.42712e-05
	OTU_2195	-3.93717	0.383	0.0423179		OTU_269	-2.02051	0.544	0.0063511
	OTU_2231	-3.93717	0.383	0.0423179		OTU_199	-1.99705	0.661	0.00213146
	OTU_2347	-3.93717	0.383	0.0423179		OTU_236	-1.98946	0.653	0.00261826
	OTU_2621	-3.93717	0.383	0.0423179		OTU_90	-1.98505	1.429	5.62679e-06
	OTU_2120	-3.92475	0.368	0.0102434		OTU_761	-1.94558	0.412	0.0365397
	OTU_1929	-3.88503	0.523	0.0372727		OTU_38	-1.93227	2.581	0.0015635
	OTU_2284	-3.81723	0.489	0.00221152		OTU_53	-1.89777	2.478	5.52593e-10
	OTU_1581	-3.8146	0.489	0.000647623		OTU_138	-1.88618	0.894	0.0284274
	OTU_1426	-3.80136	0.336	0.0241722		OTU_35	-1.86099	1.96	0.0411143
	OTU_1649	-3.78454	0.336	0.0109432		OTU_358	-1.85502	0.753	0.00594591
	OTU_2932	-3.78454	0.336	0.0109432		OTU_181	-1.80737	0.86	0.000538616
	OTU_1101	-3.78231	0.336	0.0121705		OTU_256	-1.77646	0.574	0.0197529
	OTU_1198	-3.72739	0.465	0.000645555		OTU_159	-1.75411	1.176	0.000662488
	OTU_654	-3.69445	0.452	0.00311851		OTU_242	-1.6515	1.171	0.00428244
	OTU_2049	-3.69441	0.301	0.0172538		OTU_575	-1.64968	0.501	0.0371882
	OTU_1299	-3.67666	0.452	0.0131382		OTU_46	-1.58557	2.003	2.25316e-06
	OTU_1481	-3.66852	0.301	0.012071		OTU_412	-1.57119	0.766	0.00538883
	OTU_869	-3.66813	0.899	0.00771751		OTU_1622	-1.52658	0.772	0.0156226
	OTU_4605	-3.6204	0.283	0.0257		OTU_262	-1.47087	0.74	0.0461918
	OTU_895	-3.5441	0.263	0.0181093		OTU_277	-1.37435	0.699	0.0199377
	OTU_839	-3.51039	0.398	0.00184724		OTU_233	-1.23041	1.038	0.0428009
	OTU_1030	-3.50805	0.243	0.00526265		OTU_3	0.793832	3.204	0.000376299
	OTU_1627	-3.49354	0.243	0.00934506		OTU_66	1.02909	2.023	0.0190929
	OTU_2406	-3.47652	0.243	0.0239303		OTU_92	1.23635	1.913	0.0157833
	OTU_1861	-3.45003	0.222	0.00585248		OTU_222	1.26436	0.993	0.0487082
	OTU_1157	-3.43826	0.222	0.0259373		OTU_398	1.40066	0.74	0.0364177
	OTU_2399	-3.4059	0.222	0.0255893		OTU_353	1.40157	0.95	0.0123681
	OTU_2463	-3.4059	0.222	0.0255893		OTU_249	1.4632	0.958	0.00191682
	OTU_1017	-3.38473	0.885	0.00132454		OTU_307	1.48776	0.611	0.0251088
	OTU_1201	-3.36614	0.2	0.00808845		OTU_406	1.49775	0.684	0.0190403
	OTU_1189	-3.36286	0.2	0.0114321		OTU_142	1.52875	1.673	0.0317685
	OTU_300	-3.34414	1.478	1.49026e-12		OTU_851	1.53136	0.628	0.0461918
	OTU_767	-3.33462	0.2	0.024566		OTU_272	1.53778	1.228	0.00037483
	OTU_3340	-3.33201	0.352	0.00519912		OTU_171	1.66742	1.394	0.00921402
	OTU_1063	-3.32929	0.2	0.0368834		OTU_251	1.70157	0.802	0.0479055
	OTU_1205	-3.32273	0.176	0.0315116		OTU_34	1.75037	1.885	0.00589693
	OTU_1254	-3.30213	0.176	0.0131127		OTU_378	1.76457	0.807	0.00250262
	OTU_1165	-3.29768	0.352	0.0394169		OTU_202	1.81292	0.97	0.00511318
	OTU_1409	-3.28802	0.796	0.0463457		OTU_65	1.82189	2.138	0.000606221
	OTU_633	-3.28116	0.938	0.00121324		OTU_2727	1.85508	1.161	0.0199377
	OTU_3077	-3.25297	0.176	0.0301563		OTU_10	1.89139	3.219	0.000677651
	OTU_1872	-3.25183	0.176	0.0394112		OTU_248	1.95687	1.174	0.00111404
	OTU_933	-3.21828	0.319	0.00764159		OTU_263	1.96397	1.103	0.00748121
	OTU_1906	-3.20971	0.151	0.0124567		OTU_177	1.99385	1.628	0.000428925
	OTU_1139	-3.19147	0.151	0.0477045		OTU_27	2.02057	2.686	0.00448913
	OTU_2245	-3.18158	0.87	0.0344378		OTU_295	2.03582	0.813	0.000748802
	OTU_1528	-3.17429	0.151	0.0476767		OTU_558	2.05793	0.368	0.0194532
	OTU_381	-3.16772	0.903	8.84717e-05		OTU_250	2.07134	1.048	0.000265818
	OTU_1122	-3.14086	0.301	0.0463457		OTU_22	2.10069	2.648	0.00869308
	OTU_1099	-3.12536	0.855	0.0370228		OTU_110	2.12163	1.547	0.00681155
	OTU_380	-3.10415	1.708	0.000432958		OTU_342	2.14257	0.452	0.0268712
	OTU_1544	-3.08602	0.263	0.0230408		OTU_481	2.16493	0.778	0.000428925
	OTU_1339	-3.05179	0.263	0.0483096		OTU_507	2.20178	0.74	0.00488194
	OTU_533	-3.01506	0.097	0.0271192		OTU_661	2.22107	0.501	0.0260886
	OTU_1616	-2.99412	0.097	0.0483037		OTU_527	2.22981	0.412	0.045121
	OTU_1179	-2.94692	0.243	0.0241722		OTU_383	2.22998	0.835	0.000582573
	OTU_303	-2.91763	1.535	6.03391e-06		OTU_284	2.25567	1.048	5.82224e-05
	OTU_1307	-2.89344	0.829	0.0348864		OTU_20	2.26822	2.077	0.00656825
	OTU_1220	-2.85683	0.222	0.0474459		OTU_216	2.2838	1.607	0.000993701
	OTU_3277	-2.85062	0.637	0.00357559		OTU_354	2.30009	1	0.0266784
	OTU_1308	-2.82893	0.035	0.0419685		OTU_387	2.32988	0.978	0.0137733
	OTU_4254	-2.8213	0.2	0.0263166		OTU_259	2.33416	0.958	0.0461918
	OTU_87	-2.78091	2.122	0.00345744		OTU_204	2.36852	1.188	0.011874
	OTU_621	-2.77368	1.079	0.00159259		OTU_167	2.37639	0.908	0.00554876
	OTU_56	-2.76248	2.225	3.61136e-05		OTU_321	2.39305	0.713	0.00238183
	OTU_711	-2.74572	0.713	0.000902401		OTU_41	2.41658	2.772	0.0178464
	OTU_5388	-2.72974	0.699	0.00514792		OTU_545	2.41794	0.439	0.0460475
	OTU_1752	-2.71778	0	0.0471944		OTU_329	2.44501	1.128	0.0301382
	OTU_5045	-2.64723	1.74	1.49026e-12		OTU_19	2.45118	3.146	0.0256704
	OTU_2127	-2.6051	0.807	0.000266408		OTU_288	2.47588	0.489	0.0327913
	OTU_988	-2.60379	0.669	0.00217108		OTU_101	2.56955	1.671	7.15842e-06
	OTU_728	-2.58999	0.283	0.0379811		OTU_428	2.60368	0.412	0.00994493
	OTU_684	-2.57891	0.283	0.0349142		OTU_368	2.61666	1.122	1.76014e-05
	OTU_967	-2.57823	0.564	0.00945106		OTU_1627	2.63227	0.865	0.000703943
[truncated: 461 more rows]

## Sheet: Table S5
Table S5. The document information of probiotics in the plant.
Taxonomy		Effect	Reference linkages	Reference
genus	species
Acidiphilium	Acidiphilium sp.	Increase P solubilization from AlPO2(Rice,Melaleuca cajuputi, and Scleria sumatrensis).	https://www.researchgate.net/publication/37571153_Screening_of_phosphate-solubilizing_microorganisms_in_rhizosphere_and_rhizoplane_of_adverse_soil-adapting_plants_in_Southern_Thailand	Pengnoo A, Hashidoko Y, Onthong J, Gimsanguan S, Sae-ong M, Watanabe T, Osaki M, Shinano T. Screening of phosphate- solubilizing microorganisms in rhizosphere and rhizoplane of adverse soil-adapting plants in Southern Thailand. <i>Tropics</i>. 2007 Jan. 16:1-7
Acidocella	Acidocella sp.	Increase P solubilization from AlPO1(Rice,Melaleuca cajuputi, and Scleria sumatrensis).	https://www.researchgate.net/publication/37571153_Screening_of_phosphate-solubilizing_microorganisms_in_rhizosphere_and_rhizoplane_of_adverse_soil-adapting_plants_in_Southern_Thailand	Pengnoo A, Hashidoko Y, Onthong J, Gimsanguan S, Sae-ong M, Watanabe T, Osaki M, Shinano T. Screening of phosphate- solubilizing microorganisms in rhizosphere and rhizoplane of adverse soil-adapting plants in Southern Thailand. <i>Tropics</i>. 2007 Jan. 16:1-7
Acinetobacter	Acinetobacter calcoaceticus	Promote plant growth(Barley and chickpea).	http://www.ncbi.nlm.nih.gov/pubmed/?term=19467815	Peix A, Lang E, Verbarg S, Spr?er C, Rivas R, Santa-Regina I, Mateos PF, Martínez-Molina E, Rodríguez-Barrueco C, Velázquez E. Acinetobacter strains IH9 and OCI1, two rhizospheric phosphate solubilizing isolates able to promote plant growth, constitute a new genomovar of Acinetobacter calcoaceticus. <i>Syst Appl Microbiol</i>. 2009 Aug. 32(5):334-41.
	Acinetobacter rhizosphaerae	[1] Beneficial properties:P-solubilization, Production of ACC deaminase, IAA,ammonia, siderophore. [2] Test plant. [3] Inoculation response:A significant incremental increase in shoot length, dry weight and yield.	http://www.ncbi.nlm.nih.gov/pubmed/?term=19137371	Gulati A, Vyas P, Rahi P, Kasana RC. Plant growth-promoting and rhizosphere-competent Acinetobacter rhizosphaerae strain BIHB 723 from the cold deserts of the Himalayas. <i>Curr Microbiol</i>. 2009 Apr. 58(4):371-7.
	Acinetobacter sp.	Info will be available soon	http://www.ncbi.nlm.nih.gov/pubmed/?term=22203552	Ruiz D, Agaras B, de Werra P, Wall LG, Valverde C. Characterization and screening of plant probiotic traits of bacteria isolated from rice seeds cultivated in Argentina. <i>J Microbiol</i>. 2011 Dec. 49(6):902-12.
	Acinetobacter sp.	Solubilization of insoluble phosphorus(Rice).	http://www.ncbi.nlm.nih.gov/pubmed/?term=17425114	Islama MT, Deora A, Hashidoko Y, Rahman A, Ito T, Tahara S. Isolation and identification of potential phosphate solubilizing bacteria from the rhizoplane of Oryza sativa L. cv. BR29 of Bangladesh. <i>Z Naturforsch C</i>. 2007 Jan-Feb. 62(1-2):103-10.
	Acinetobacter sp.	Solubilize P from tricalcium phosphate (TCP)(Rice).	http://www.iisc.ernet.in/currsci/apr102004/978.pdf	Thakuria D, Talukdar NC, Goswami C, Hazarika S, Boro RC, Khan MR. Characterization and screening of bacteria from rhizosphere of rice grown in acidic soils of Assam. <i>Curr Sci</i>. 2004 Apr. 86:978-985
	Acinetobacter sp.	Solubilization of insoluble phosphorus(Rice).	http://www.ncbi.nlm.nih.gov/pubmed/?term=17425114	Islama MT, Deora A, Hashidoko Y, Rahman A, Ito T, Tahara S. Isolation and identification of potential phosphate solubilizing bacteria from the rhizoplane of Oryza sativa L. cv. BR29 of Bangladesh. <i>Z Naturforsch C</i>. 2007 Jan-Feb. 62(1-2):103-10.
	Acinetobacter sp.	Increase P solubilization from Ca3PO4and AlPO4.	http://www.ncbi.nlm.nih.gov/pubmed/?term=24894539	Bakhshandeh E, Rahimian H, Pirdashti H, Nematzadeh GA. Phosphate solubilization potential and modeling of stress tolerance of rhizobacteria from rice paddy soil in northern Iran. <i>World J Microbiol Biotechnol</i>. 2014 Sep. 30(9):2437-47.
	Acinetobacter sp.	[1] Promote plant growth when applied with AM fungi. [2] Increase wheat P content and dry matter(Wheat).	http://link.springer.com/article/10.1007/s00374-010-0475-7	Ogut M, Er F, Kandemir N. Phosphate solubilization potentials of soil Acinetobacter strains. <i>Biol Fertil Soils</i>. 2010 Sep. 46:707-715
	Acinetobacter sp.	Solubilization of insoluble phosphorus(Wheat).	http://link.springer.com/article/10.1007/s00374-010-0475-7	Ogut M, Er F, Kandemir N. Phosphate solubilization potentials of soil Acinetobacter strains. <i>Biol Fertil Soils</i>. 2010 Sep. 46:707-715
Bacillus	Bacillus amyloliquefaciens	provides protection against various soilborn diseases and generally strengthens plants' vitality and yield.	http://abitep.de/index.php/en/rhizovital.html; ; https://www.researchgate.net/publication/291738678_The_Role_of_Bacillus_Bacterium_in_Formation_of_Plant_Defence_Mechanism_and_Reaction	Website of ABiTEP – Biotech for Agriculture and Ecology; Igor Maksimov, Ramil Khairullin. The Role of Bacillus Bacterium in Formation of Plant Defence: Mechanism and Reaction. <i>Igor Vladimirovich Maksimov</i>. Jan 26, 2016.
	Bacillus amyloliquefaciens	Enhance shoot and root length of wheat and maize; P-uptake of cotton(Wheat, maize,and cotton).	http://www.ag.auburn.edu/auxiliary/nsdl/scasc/Proceedings/2004/Egamberdiyeva.pdf	Egamberdiyeva D, Juraeva D, Poberejskaya S, Myachina O, Teryuhova P, Seydalieva L, Aliev A. Improvement of wheat and cotton growth and nutrient uptake by phosphate solubilizing bacteria. <i>26th Southern Conservation Tillage Conference</i>. 2003
	Bacillus amyloliquefaciens	Promotes plant growth and suppresses plant pathogenic organisms present in the rhizosphere.	http://www.ncbi.nlm.nih.gov/pubmed/?term=18482834	John RP, Gangadharan D, Madhavan Nampoothiri K. Genome shuffling of Lactobacillus delbrueckii mutant and Bacillus amyloliquefaciens through protoplasmic fusion for L-lactic acid production from starchy wastes. <i>Bioresour Technol</i>. 2008 Nov. 99(17):8008-15.
	Bacillus amyloliquefaciens	Seedling pathogen	http://www.ncbi.nlm.nih.gov/pubmed/?term=21950110; https://www.researchgate.net/publication/291738678_The_Role_of_Bacillus_Bacterium_in_Formation_of_Plant_Defence_Mechanism_and_Reaction	Maksimov IV, Abizgil'dina RR, Pusenkova LI. Plant growth promoting microorganisms as alternative to chemical protection from pathogens (review). <i>Prikl Biokhim Mikrobiol</i>. 2011 Jul-Aug. 47(4):373-85; Igor Maksimov, Ramil Khairullin. The Role of Bacillus Bacterium in Formation of Plant Defence: Mechanism and Reaction. <i>Igor Vladimirovich Maksimov</i>. Jan 26, 2016.
	Bacillus baekryungensis	Was recommended for the growth promotion and immune enhancement of A. japonicus.	http://link.springer.com/article/10.1007/s11802-014-2238-9	Fajun Yan, Xiangli Tian , Shuanglin Dong. Effect of Bacillus baekryungensis YD13 supplemented in diets on growth performance and immune response of sea cucumber (Apostichopus japonicus). <i>Journal of Ocean University of China</i>. 2014 Oct. 13(5):805-810
	Bacillus cereus	discovered growth promotion in plants and their antagonism against Meloidogyne incognita after treatment.	http://www.ncbi.nlm.nih.gov/pubmed/?term=21950110	Maksimov IV, Abizgil'dina RR, Pusenkova LI. Plant growth promoting microorganisms as alternative to chemical protection from pathogens (review). <i>Prikl Biokhim Mikrobiol</i>. 2011 Jul-Aug. 47(4):373-85.
	Bacillus circulans	[1] Increase P availability in alluvial soil. [2] increase root and shoot biomass, straw and grain yield, and P and N uptake( Mung bean).	http://link.springer.com/article/10.1007%2FBF00011908	Gaind S, Gaur AC. Thermotolerant phosphate solubilizing microorganisms and their interaction with mung bean. <i>Plant Soil</i>. 1991 May. 133:141-149
	Bacillus circulans	[1] Increase P availability in alluvial soil. [3] increase root and shoot biomass, straw and grain yield, and P and N uptake(Mung bean).	http://link.springer.com/article/10.1007%2FBF00011908	Gaind S, Gaur AC. Thermotolerant phosphate solubilizing microorganisms and their interaction with mung bean. <i>Plant Soil</i>. 1991 May. 133:141-149
	Bacillus coagulans	Has the potential for application in biological pesticides.	http://link.springer.com/article/10.1007/s13213-012-0564-y	HaiKuan Wang , FaDi Shen, RuiFeng Xiao, YanChao Zhou, YuJie Dai. Purification and characterization of antifungal compounds from Bacillus coagulans TQ33 isolated from skimmed milk powder. <i>Annals of Microbiology</i>. 2013 Sep. 63(3):1075-1081
	Bacillus firmus	Increase grain and straw yield(Rice).	http://link.springer.com/article/10.1007/BF02372457	Datta M, Banish S, Dupta RK. Studies on the efficacy of a phytohormone producing phosphate solubilizing Bacillus firmus in augmenting paddy yield in acid soils of Nagaland. <i>Plant Soil</i>. 1982 Oct. 69:365-373
	Bacillus firmus	is a promising nematicidal agent, and has great potential in plant-parasitic nematicidal management.	http://www.ncbi.nlm.nih.gov/pubmed/?term=25672545	Xiong J, Zhou Q, Luo H, Xia L, Li L, Sun M, Yu Z. Systemic nematicidal activity and biocontrol efficacy of Bacillus firmus against the root-knot nematode Meloidogyne incognita. <i>World J Microbiol Biotechnol</i>. 2015 Apr. 31(4):661-7.
	Bacillus licheniformis	control root-infecting fungi.	http://www.ncbi.nlm.nih.gov/pubmed/?term=19568745	Berg G. Plant-microbe interactions promoting plant growth and health: perspectives for controlled use of microorganisms in agriculture. <i>Appl Microbiol Biotechnol<i>. 2009 Aug. 84(1):11-8.
	Bacillus licheniformis	is used on ornamental plants and ornamental turf to prevent and treat many fungal diseases.	http://www.ncbi.nlm.nih.gov/pubmed/?term=21950110; https://www.researchgate.net/publication/291738678_The_Role_of_Bacillus_Bacterium_in_Formation_of_Plant_Defence_Mechanism_and_Reaction	Maksimov IV, Abizgil'dina RR, Pusenkova LI. Plant growth promoting microorganisms as alternative to chemical protection from pathogens (review). <i>Prikl Biokhim Mikrobiol</i>. 2011 Jul-Aug. 47(4):373-85; Igor Maksimov, Ramil Khairullin. The Role of Bacillus Bacterium in Formation of Plant Defence: Mechanism and Reaction. <i>Igor Vladimirovich Maksimov</i>. Jan 26, 2016.
	Bacillus megaterium	control root-infecting fungi.	http://www.ncbi.nlm.nih.gov/pubmed/?term=19568745	Berg G. Plant-microbe interactions promoting plant growth and health: perspectives for controlled use of microorganisms in agriculture. <i>Appl Microbiol Biotechnol<i>. 2009 Aug. 84(1):11-8.
	Bacillus megaterium	[1] Beneficial properties:P-solubilization; production of IAA, ammonia, siderophore, HCN; biocontrol. [2] Test plant:Maize. [3] Inoculation response:Inoculations resulted in significant increase in grain yield, root–shoot ratio and nutrient content for three consecutive years. Recommended P. corrugata as suitable bioinoculant for maize fields of temperate climate grown under rainfed conditions.	http://www.sciencedirect.com/science/article/pii/S0038071707002921	Kumar B, Trivedi P, Pandey A. Pseudomonas corrugata: a suitable bioinoculant for maize grown under rainfed conditions of Himalayan region. <i>Soil Biol Biochem</i>. 2007 Dec. 39:3093-3100
	Bacillus megaterium	[1] Beneficial properties:P-solubilization; Production of IAA, ammonia, siderophore, HCN; biocontrol. [2] Test plant:Rice. [3] Inoculation response:Increase in yield and P-content of grains and shoot. Bacterial inoculation resulted in stimulation of native microbial.	http://repository.up.ac.za/dspace/handle/2263/8370	Trivedi P, Pandey A, Palni LMS, Bag N, Tamang MB. Colonization of rhizosphere of tea by growth promoting bacteria. <i>Int J Tea Sci</i>. 2005. 4:19-25
	Bacillus megaterium	Enhance seed germination, growth,and yield(Rice).	http://www.ajofai.info/Abstract/Effect%20of%20salt-tolerant%20bacillus%20inoculum%20on%20rice%20kdml%20105%20cultivated%20in%20saline%20soil.pdf	Sapsirisopa S, Chookietwattana K, Maneewan K, Khaengkhan P. Effect of salt-tolerant Bacillus inoculum on rice KDML 105 cultivated in saline soil. <i>As J Food Ag-Ind</i>. 2009 Aug. Special Issue S69-S74
	Bacillus mucilaginosus	Can first capture atmospheric CO 2 by CA, then fix atmospheric CO 2 by bacteria metabolism, which complements the content of biology and provide a new strategy for CO 2 sequestration from the air.	https://www.researchgate.net/publication/268375148_Bacillus_mucilaginosus_can_capture_atmospheric_CO_2_by_carbonic_anhydrase	Zhang Z, Lian B, Hou W, et al. Bacillus mucilaginosus can capture atmospheric CO 2 by carbonic anhydrase[J]. <i>African Journal of Microbiology Research</i>. 2011. 5(2):106-112.
	Bacillus mucilaginosus	Improve root acquisition of phosphorus and increase the phosphorus content of the plant.	https://www.ncbi.nlm.nih.gov/pubmed/?term=Growth+promoting+effect+of+a+transgenic+Bacillus+mucilaginosus+on+tobacco+planting	Li X, Wu Z, Li W, et al. Growth promoting effect of a transgenic Bacillus mucilaginosus on tobacco planting.[J]. <i>Applied Microbiology & Biotechnology</i>. 2007. 74(5):1120-5.
	Bacillus pumilus	protects the roots of the soybean plant against certain fungi.	http://www.ncbi.nlm.nih.gov/pubmed/?term=19568745; https://www3.epa.gov/pesticides/chem_search/reg_actions/registration/fs_PC-006493_13-Mar-03.pdf	Berg G. Plant-microbe interactions promoting plant growth and health: perspectives for controlled use of microorganisms in agriculture. <i>Appl Microbiol Biotechnol<i>. 2009 Aug. 84(1):11-8; Bacillus pumilus strain GB 34 (006493) Fact Sheet.
	Bacillus pumilus	Root rot (Rhizoctonia oryzae), rust (Puccinia spp., Uromyces betae, Puccinia sorghi), rice blast (Pyricularia oryzae), powdery mildew (Peronospora manshurica, Erysiphe graminis, Erysiphe betae, Erysiphe polygoni), leaf spot (Cercospora beticola, Entyloma, Dreschlera, Exserohilum turcicum, Helminthosporium, Bipolaris maydis, Cochliobolus heterostrophus, Ceratobasidium, Ramularia), bacterial spot (…	https://www.researchgate.net/publication/291738678_The_Role_of_Bacillus_Bacterium_in_Formation_of_Plant_Defence_Mechanism_and_Reaction	Igor Maksimov, Ramil Khairullin. The Role of Bacillus Bacterium in Formation of Plant Defence: Mechanism and Reaction. <i>Igor Vladimirovich Maksimov</i>. Jan 26, 2016.
	Bacillus sp.	Increase P efficiency(Maize).	http://www.sciencedirect.com/science/article/pii/S0038071708000679	Oliveira CA, Alves VMC, Marriel IE, Gomes EA, Scotti MR, Carneiro NP, Guimaraes CT, Schaffert RE, Sa' NMH. Phosphate solubilizing microorganisms isolated from rhizosphere of maize cultivated in an oxisol of the Brazilian Cerrado Biome. <i>Soil Biol Biochem</i>. 2009 Sep. 41:1782-1787
	Bacillus sp.	Info will be available soon	http://www.ncbi.nlm.nih.gov/pubmed/?term=16349289	Burkhead KD, Schisler DA, Slininger PJ. Pyrrolnitrin Production by Biological Control Agent Pseudomonas cepacia B37w in Culture and in Colonized Wounds of Potatoes. <i>Appl Environ Microbiol</i>. 1994 Jun. 60(6):2031-9.
	Bacillus sp.	Increase grain and biomass yields of barley and leaf, root and sugar yield of sugar beet(Barley and sugar bee).	http://link.springer.com/article/10.1007/s11104-005-0334-8	Sahin F, Cakmakci R, Kantar F. Sugar beet and barley yields in relation to inoculation with N2-fixing and phosphate solubilizing bacteria. <i>Plant Soil</i>. 2004 Aug. 265:123-129
	Bacillus sp.	Increase available phosphate in soil and plant biomass(Maize).	http://link.springer.com/article/10.1007/s00374-005-0034-9	Canbolat MY, Bilen S, Cakmakci R, Sahin F, Aydin A. Effect of plant growth-promoting bacteria and soil compaction on barley seedling growth, nutrient uptake, soil properties and rhizosphere microflora. <i>Biol Fertil Soils</i>. 2006 Mar. 42:350-357
	Bacillus sp.	[1] Enhance P uptake, plant biomass, plant height, and root morphology. [2] Enhance P solubilization, leaf chlorophyll content,photosynthesis rate, and root development. [3] Enhance plant biomass and root growth(Aerobic rice).	http://revistas.inia.es/index.php/sjar/article/view/2034; http://www.ipcbee.com/vol9/28-B064.pdf	Panhwar QA, Othman R, Zaharah AR, Sariah M, Naher UA. Contribution of phosphatesolubilizing bacteria in phosphorus bioavailability and growth enhancement of aerobic rice. <i>Span J Agric Res</i>. 2011. 3:810-820; Panhwar QA, Othman R, Zaharah AR, Sariah M, Razi IM (2011b) Role of phosphate solubilizing bacteria on rock phosphate solubility and growth of aerobic rice. <i>J Environ Biol</i>. 32:607…
	Bacillus sp.	Solubilization of insoluble phosphorus(Aerobic rice).	http://www.ncbi.nlm.nih.gov/pubmed/?term=22319876	Panhwar QA, Radziah O, Zaharah AR, Sariah M, Razi IM. Role of phosphate solubilizing bacteria on rock phosphate solubility and growth of aerobic rice. <i>J Environ Biol</i>. 2011 Sep. 32(5):607-12.
	Bacillus sp.	[1] Enhance P uptake, plant biomass, plant height, and root morphology. [2] Enhance P solubilization, leaf chlorophyll content,photosynthesis rate, and root development. [3] Enhance plant biomass and root growth.	http://revistas.inia.es/index.php/sjar/article/view/2034; http://www.ipcbee.com/vol9/28-B064.pdf	Panhwar QA, Othman R, Zaharah AR, Sariah M, Naher UA. Contribution of phosphatesolubilizing bacteria in phosphorus bioavailability and growth enhancement of aerobic rice. <i>Span J Agric Res</i>. 2011. 3:810-820; Panhwar QA, Othman R, Zaharah AR, Sariah M, Razi IM (2011b) Role of phosphate solubilizing bacteria on rock phosphate solubility and growth of aerobic rice. <i>J Environ Biol</i>. 32:607…
	Bacillus sp.	Increase grain yield(Rice).	http://www.iisc.ernet.in/currsci/apr102004/978.pdf	Thakuria D, Talukdar NC, Goswami C, Hazarika S, Boro RC, Khan MR. Characterization and screening of bacteria from rhizosphere of rice grown in acidic soils of Assam. <i>Curr Sci</i>. 2004 Apr. 86:978-985
	Bacillus sp.	Solubilization of insoluble phosphorus(rice).	http://www.iisc.ernet.in/currsci/apr102004/978.pdf	Thakuria D, Talukdar NC, Goswami C, Hazarika S, Boro RC, Khan MR. Characterization and screening of bacteria from rhizosphere of rice grown in acidic soils of Assam. <i>Curr Sci</i>. 2004 Apr. 86:978-985
	Bacillus sp.	Increase available phosphate in soil and plant biomass(Maize).	http://link.springer.com/article/10.1007/s00374-005-0034-9	Canbolat MY, Bilen S, Cakmakci R, Sahin F, Aydin A. Effect of plant growth-promoting bacteria and soil compaction on barley seedling growth, nutrient uptake, soil properties and rhizosphere microflora. <i>Biol Fertil Soils</i>. 2006 Mar. 42:350-357
	Bacillus sp.	Promote plant growth and yield(Cowpea).	http://www.sciencedirect.com/science/article/pii/S0929139311001594	Nain ML, Yadav RC, Saxena J. Characterization of multifaceted Bacillus sp. RM-2 for its use as plant growth promoting bioinoculant for crops grown in semi arid deserts. <i>Appl Soil Ecol</i>. 2012 Aug. 59:124-135
	Bacillus subtilis	Seed mould, Helminthosporium root rot, Fusarium root rot, powdery mildew	https://www.researchgate.net/publication/291738678_The_Role_of_Bacillus_Bacterium_in_Formation_of_Plant_Defence_Mechanism_and_Reaction; http://www.ncbi.nlm.nih.gov/pubmed/?term=21950110	Igor Maksimov, Ramil Khairullin. The Role of Bacillus Bacterium in Formation of Plant Defence: Mechanism and Reaction. <i>Igor Vladimirovich Maksimov</i>. Jan 26, 2016; Maksimov IV, Abizgil'dina RR, Pusenkova LI. Plant growth promoting microorganisms as alternative to chemical protection from pathogens (review). <i>Prikl Biokhim Mikrobiol</i>. 2011 Jul-Aug. 47(4):373-85.
	Bacillus subtilis	Pseudomonas syringae pv. syringae, Xanthomonas campestris pv. vesicatoria and Clavibacter michiganensis subsp. michiganensis	https://www.researchgate.net/publication/291738678_The_Role_of_Bacillus_Bacterium_in_Formation_of_Plant_Defence_Mechanism_and_Reaction	Igor Maksimov, Ramil Khairullin. The Role of Bacillus Bacterium in Formation of Plant Defence: Mechanism and Reaction. <i>Igor Vladimirovich Maksimov</i>. Jan 26, 2016.
	Bacillus subtilis	Promote establishment of AM endophytes, increase biomass,N and P accumulation in plant tissues, and promote biogeochemical P cyclin(Onion).	http://www.ncbi.nlm.nih.gov/pubmed/?term=16535730	Toro M, Azcon R, Barea J. Improvement of Arbuscular Mycorrhiza Development by Inoculation of Soil with Phosphate-Solubilizing Rhizobacteria To Improve Rock Phosphate Bioavailability ((sup32)P) and Nutrient Cycling. <i>Appl Environ Microbiol</i>. 1997 Nov. 63(11):4408-12.
	Bacillus subtilis	[1] Beneficial properties:P-solubilization; production of IAA, ammonia, siderophore, HCN; biocontrol. [2] Test plant:Maize. [3] Inoculation response:Inoculations resulted in significant increase in grain yield, root–shoot ratio and nutrient content for three consecutive years. Recommended P. corrugata as suitable bioinoculant for maize fields of temperate climate grown under rainfed conditions.	http://www.sciencedirect.com/science/article/pii/S0038071707002921	Kumar B, Trivedi P, Pandey A. Pseudomonas corrugata: a suitable bioinoculant for maize grown under rainfed conditions of Himalayan region. <i>Soil Biol Biochem</i>. 2007 Dec. 39:3093-3100
	Bacillus subtilis	[1] Beneficial properties:P-solubilization; Production of IAA, ammonia, siderophore, HCN; biocontrol. [2] Test plant:Rice. [3] Inoculation response:Increase in yield and P-content of grains and shoot. Bacterial inoculation resulted in stimulation of native mice.	http://repository.up.ac.za/dspace/handle/2263/8370	Trivedi P, Pandey A, Palni LMS, Bag N, Tamang MB. Colonization of rhizosphere of tea by growth promoting bacteria. <i>Int J Tea Sci</i>. 2005. 4:19-25
	Bacillus subtilis	effective against molding and decay of various crops' seeds,black stem, late blight disease and blackspot of potato.	http://www.ncbi.nlm.nih.gov/pubmed/?term=21950110	Maksimov IV, Abizgil'dina RR, Pusenkova LI. Plant growth promoting microorganisms as alternative to chemical protection from pathogens (review). <i>Prikl Biokhim Mikrobiol</i>. 2011 Jul-Aug. 47(4):373-85.
	Bacillus subtilis	Bare patch, late blight disease, rooteater, phoma rot, early blight, powdery mildew, root rots, tracheomycosis fading, bacteriosis, false mildew.	http://www.ncbi.nlm.nih.gov/pubmed/?term=21950110; https://www.researchgate.net/publication/291738678_The_Role_of_Bacillus_Bacterium_in_Formation_of_Plant_Defence_Mechanism_and_Reaction	Maksimov IV, Abizgil'dina RR, Pusenkova LI. Plant growth promoting microorganisms as alternative to chemical protection from pathogens (review). <i>Prikl Biokhim Mikrobiol</i>. 2011 Jul-Aug. 47(4):373-85; Igor Maksimov, Ramil Khairullin. The Role of Bacillus Bacterium in Formation of Plant Defence: Mechanism and Reaction. <i>Igor Vladimirovich Maksimov</i> Jan 26, 2016.
	Bacillus subtilis	Black stem, root rots, fading, late blight disease, powdery mildew, grey rot	http://www.ncbi.nlm.nih.gov/pubmed/?term=21950110; https://www.researchgate.net/publication/291738678_The_Role_of_Bacillus_Bacterium_in_Formation_of_Plant_Defence_Mechanism_and_Reaction	Maksimov IV, Abizgil'dina RR, Pusenkova LI. Plant growth promoting microorganisms as alternative to chemical protection from pathogens (review). <i>Prikl Biokhim Mikrobiol</i>. 2011 Jul-Aug. 47(4):373-85; Igor Maksimov, Ramil Khairullin. The Role of Bacillus Bacterium in Formation of Plant Defence: Mechanism and Reaction. <i>Igor Vladimirovich Maksimov</i> Jan 26, 2016.
	Bacillus subtilis	Colletotrichum gloeosporioides and Cercospora spot	https://www.researchgate.net/publication/291738678_The_Role_of_Bacillus_Bacterium_in_Formation_of_Plant_Defence_Mechanism_and_Reaction	Igor Maksimov, Ramil Khairullin. The Role of Bacillus Bacterium in Formation of Plant Defence: Mechanism and Reaction. <i>Igor Vladimirovich Maksimov</i>. Jan 26, 2016.
	Bacillus subtilis	The commercial product contains grinded mycorrhizal roots, spores and mycelia of arbuscular mycorrhizal fungi (AMF) Glomus mosseae GP11, G. viscosum GC41, G. intraradices GB67, as well as plant-growth-promoting-rhizobacteria (PGPR) like Pseudomonas sp. PN 01, P. fluorescens PA28, Bacillus subtilis BA41, Streptomyces sp. SB14, and the antagonistic saprophytic fungus Trichoderma viride TH03. For pr…	http://orgprints.org/10307/1/bosco-etal-2007-commercial_plant-probiotic.pdf	M. Bosco, G. Giovannetti, C. Picard, E. Baruffa, A. Brondolo, F. Sabbioni. Commercial plant-probiotic microorganisms for sustainable organic tomato production systems. <i>3rd QLIF Congress<i>. 2007 March. Hohenheim, Germany.
	Bacillus subtilis	Fusarium, Verticillium, Pythium, Cercospora, Colletotrichum, Alternaria, Ascochyta, Macrophomina, Myrothecium, Ramularia, Xanthomonas and Erysiphe polygoni	https://www.researchgate.net/publication/291738678_The_Role_of_Bacillus_Bacterium_in_Formation_of_Plant_Defence_Mechanism_and_Reaction	Igor Maksimov, Ramil Khairullin. The Role of Bacillus Bacterium in Formation of Plant Defence: Mechanism and Reaction. <i>Igor Vladimirovich Maksimov</i>. Jan 26, 2016.
	Bacillus subtilis	Root rots caused by Fusarium and Helminthosporium	http://www.ncbi.nlm.nih.gov/pubmed/?term=21950110; https://www.researchgate.net/publication/291738678_The_Role_of_Bacillus_Bacterium_in_Formation_of_Plant_Defence_Mechanism_and_Reaction	Maksimov IV, Abizgil'dina RR, Pusenkova LI. Plant growth promoting microorganisms as alternative to chemical protection from pathogens (review). <i>Prikl Biokhim Mikrobiol</i>. 2011 Jul-Aug. 47(4):373-85; Igor Maksimov, Ramil Khairullin. The Role of Bacillus Bacterium in Formation of Plant Defence: Mechanism and Reaction. <i>Igor Vladimirovich Maksimov</i> Jan 26, 2016.
	Bacillus subtilis	Botrytis cinerea	https://www.researchgate.net/publication/291738678_The_Role_of_Bacillus_Bacterium_in_Formation_of_Plant_Defence_Mechanism_and_Reaction	Igor Maksimov, Ramil Khairullin. The Role of Bacillus Bacterium in Formation of Plant Defence: Mechanism and Reaction. <i>Igor Vladimirovich Maksimov</i>. Jan 26, 2016.
	Bacillus subtilis	Botrytis rot, powdery mildew	https://www.researchgate.net/publication/291738678_The_Role_of_Bacillus_Bacterium_in_Formation_of_Plant_Defence_Mechanism_and_Reaction	Igor Maksimov, Ramil Khairullin. The Role of Bacillus Bacterium in Formation of Plant Defence: Mechanism and Reaction. <i>Igor Vladimirovich Maksimov</i>. Jan 26, 2016.
	Bacillus subtilis	Botrytis rot, powdery mildew	https://www.researchgate.net/publication/291738678_The_Role_of_Bacillus_Bacterium_in_Formation_of_Plant_Defence_Mechanism_and_Reaction	Igor Maksimov, Ramil Khairullin. The Role of Bacillus Bacterium in Formation of Plant Defence: Mechanism and Reaction. <i>Igor Vladimirovich Maksimov</i>. Jan 26, 2016.
	Bacillus subtilis	improve nutrient acquistion, healthy growth of tomato plants and suppress Fusarium crown and root rot disease caused by Fusarium oxysporum Schlecht f.sp radicis-lycopersici Jarvis and Shoemarker.	http://www.ncbi.nlm.nih.gov/pubmed/?term=19568745; http://escholarship.org/uc/item/8g70p0zt	Berg G. Plant-microbe interactions promoting plant growth and health: perspectives for controlled use of microorganisms in agriculture. <i>Appl Microbiol Biotechnol<i>. 2009 Aug. 84(1):11-8; Yusran, Yusran et al. Effects of Pseudomonas sp. ”Proradix” and Bacillus amyloliquefaciens FZB42 on the Establishment of AMF Infection, Nutrient Acquisition and Growth of Tomato Affected by Fusarium oxysporum…
	Bacillus subtilis	control root-infecting fungi.	http://www.ncbi.nlm.nih.gov/pubmed/?term=19568745	Berg G. Plant-microbe interactions promoting plant growth and health: perspectives for controlled use of microorganisms in agriculture. <i>Appl Microbiol Biotechnol<i>. 2009 Aug. 84(1):11-8.
	Bacillus subtilis	Seedling pathogen	http://www.ncbi.nlm.nih.gov/pubmed/?term=21950110; https://www.researchgate.net/publication/291738678_The_Role_of_Bacillus_Bacterium_in_Formation_of_Plant_Defence_Mechanism_and_Reaction	Maksimov IV, Abizgil'dina RR, Pusenkova LI. Plant growth promoting microorganisms as alternative to chemical protection from pathogens (review). <i>Prikl Biokhim Mikrobiol</i>. 2011 Jul-Aug. 47(4):373-85; Igor Maksimov, Ramil Khairullin. The Role of Bacillus Bacterium in Formation of Plant Defence: Mechanism and Reaction. <i>Igor Vladimirovich Maksimov</i>. Jan 26, 2016.
	Bacillus subtilis	Responses are typically a mixture of growth promotion (increased root mass) and disease suppression (Rhizoctonia and Fusarium spp).	http://www.ncbi.nlm.nih.gov/pubmed/?term=19568745; http://link.springer.com/article/10.1038/sj.jim.2900439	Berg G. Plant-microbe interactions promoting plant growth and health: perspectives for controlled use of microorganisms in agriculture. <i>Appl Microbiol Biotechnol<i>. 2009 Aug. 84(1):11-8; PM Brannen, DS Kenney. Kodiak—a successful biological-control product for suppression of soil-borne plant pathogens of cotton. <i>Journal of Industrial Microbiology & Biotechnology</i>. 1997. 19:169–171.
	Bacillus subtilis	decreased the development ofroot rots in winter wheat by four times and affection with powdery mildew reduced it by ten times.	http://www.ncbi.nlm.nih.gov/pubmed/?term=21950110	Maksimov IV, Abizgil'dina RR, Pusenkova LI. Plant growth promoting microorganisms as alternative to chemical protection from pathogens (review). <i>Prikl Biokhim Mikrobiol</i>. 2011 Jul-Aug. 47(4):373-85.
	Bacillus subtilis	Having Antifungal and Antimicrobial Properties.	http://link.springer.com/article/10.1007/s10068-013-0225-3	Na-Kyoung Lee, So-Yeon Kim, Shin-Yang Choi, Hyun-Dong Paik. Probiotic Bacillus subtilis KU201 having antifungal and antimicrobial properties isolated from kimchi. <i>Food Science and Biotechnology</i>. 2013 Oct. 22(5):1–5
	Bacillus subtilis	Black stem, root rots, fading, late blight disease, powdery mildew, grey rot	http://www.ncbi.nlm.nih.gov/pubmed/?term=21950110; https://www.researchgate.net/publication/291738678_The_Role_of_Bacillus_Bacterium_in_Formation_of_Plant_Defence_Mechanism_and_Reaction	Maksimov IV, Abizgil'dina RR, Pusenkova LI. Plant growth promoting microorganisms as alternative to chemical protection from pathogens (review). <i>Prikl Biokhim Mikrobiol</i>. 2011 Jul-Aug. 47(4):373-85; Igor Maksimov, Ramil Khairullin. The Role of Bacillus Bacterium in Formation of Plant Defence: Mechanism and Reaction. <i>Igor Vladimirovich Maksimov</i> Jan 26, 2016.
	Bacillus subtilis	Root rot and seed treatments (Fusarium, R. solani, Aspergillus, Pythium and Alternaria)	https://www.researchgate.net/publication/291738678_The_Role_of_Bacillus_Bacterium_in_Formation_of_Plant_Defence_Mechanism_and_Reaction	Igor Maksimov, Ramil Khairullin. The Role of Bacillus Bacterium in Formation of Plant Defence: Mechanism and Reaction. <i>Igor Vladimirovich Maksimov</i>. Jan 26, 2016.
	Bacillus subtilis	Fusarium spp., Rhizoctonia spp., Aspergillus	https://www.researchgate.net/publication/291738678_The_Role_of_Bacillus_Bacterium_in_Formation_of_Plant_Defence_Mechanism_and_Reaction	Igor Maksimov, Ramil Khairullin. The Role of Bacillus Bacterium in Formation of Plant Defence: Mechanism and Reaction. <i>Igor Vladimirovich Maksimov</i>. Jan 26, 2016.
	Bacillus subtilis	[1] Beneficial properties:P-solubilization; Production of IAA, ammonia, siderophore, HCN; biocontrol. [2] Test plant:Lentil. [3] Inoculation response:Positive influence of bacterial inoculation on plant biomass and yield related parameters were observed for two consecutive years. The significant increase in growth and nodule numbers as well as leghaemoglobin and protein concentration of nodules i…	http://onlinelibrary.wiley.com/doi/10.1002/jpln.200800153/abstract	Rinu K, Pandey A. Bacillus subtilis NRRL B-30408 inoculation enhances the symbiotic efficiency of Lens esculenta Moench at a Himalayan location. <i>J Plant Nutr Soil Sci</i>. 2009 Feb. 172:134-139
	Bacillus subtilis	Rhizoctonia, Pythium, Fusarium, Phytophthora, Botrytis, Erwinia, Xanthomonas	https://www.researchgate.net/publication/291738678_The_Role_of_Bacillus_Bacterium_in_Formation_of_Plant_Defence_Mechanism_and_Reaction	Igor Maksimov, Ramil Khairullin. The Role of Bacillus Bacterium in Formation of Plant Defence: Mechanism and Reaction. <i>Igor Vladimirovich Maksimov</i>. Jan 26, 2016.
	Bacillus subtilis	Anthracnose (Colletotrichum spp.), bacterial leaf spot (Erwinia, Pseudomonas, Xanthomonas), leaf spot (Cercospora, Entomosporium, Helminthosporium, Myrothecium, Septoria, Diplocarpon rosea), grey mould (B. cinerea), downy mildew (Peronospora spp.), early blight (Alternaria), powdery mildew (Erysiphe, Oidium, Podosphaera, Sphaerotheca), rust (Puccinia), scab (Venturia inaequalis), root rot (R. sol…	https://www.researchgate.net/publication/291738678_The_Role_of_Bacillus_Bacterium_in_Formation_of_Plant_Defence_Mechanism_and_Reaction	Igor Maksimov, Ramil Khairullin. The Role of Bacillus Bacterium in Formation of Plant Defence: Mechanism and Reaction. <i>Igor Vladimirovich Maksimov</i>. Jan 26, 2016.
	Bacillus subtilis	owing to its intrinsic abilities of plant growth promotion, and attenuation of soil Ni by biosorption and bioaccumulation, could be exploited for bacteria-assisted phytoaccumulation of this toxic heavy metal from contaminated sites.	http://www.ncbi.nlm.nih.gov/pubmed/?term=16487570	Zaidi S, Usmani S, Singh BR, Musarrat J. Significance of Bacillus subtilis strain SJ-101 as a bioinoculant for concurrent plant growth promotion and nickel accumulation in Brassica juncea. <i>Chemosphere</i>. 2006 Aug. 64(6):991-7.
	Bacillus subtilis	Solubilization of insoluble phosphorus(Mustard plant).	http://www.ncbi.nlm.nih.gov/pubmed/?term=16487570	Zaidi S, Usmani S, Singh BR, Musarrat J. Significance of Bacillus subtilis strain SJ-101 as a bioinoculant for concurrent plant growth promotion and nickel accumulation in Brassica juncea. <i>Chemosphere</i>. 2006 Aug. 64(6):991-7.
	Bacillus subtilis	discovered growth promotion in plants and their antagonism against Meloidogyne incognita after treatment.	http://www.ncbi.nlm.nih.gov/pubmed/?term=21950110	Maksimov IV, Abizgil'dina RR, Pusenkova LI. Plant growth promoting microorganisms as alternative to chemical protection from pathogens (review). <i>Prikl Biokhim Mikrobiol</i>. 2011 Jul-Aug. 47(4):373-85.
	Bacillus subtilis	Reduce inputs on the second growing season without reducing tomato fruit yield and quality	https://www.researchgate.net/publication/28684242_Plant-probiotic_microorganisms_for_a_sustainable_buffer_of_input_reduction_in_organic_and_low-input_tomato_production_systems	Baruffa E, Picard C, Sabbioni F, et al. Plant-probiotic microorganisms for a sustainable buffer of input reduction in organic and low-input tomato production systems.[C]// Cultivating the future based on science. Volume 1: Organic Crop Production. Proceedings of the Second Scientific Conference of the International Society of Organic Agriculture Research (ISOFAR), held at the 16th IFOAM Organic W…
	Bacillus thuringiensis	Produce an antibiotic zwittermycin A that can affects the growth and activity of a wide range of microorganisms, including several plant pathogenic fungi and in particular Phytophthora and Pythiumspecies.	http://www.ncbi.nlm.nih.gov/pubmed/?term=8031096; http://www.ncbi.nlm.nih.gov/pubmed/?term=9625782	Silo-Suh LA, Lethbridge BJ, Raffel SJ, He H, Clardy J, Handelsman J. Biological activities of two fungistatic antibiotics produced by Bacillus cereus UW85. <i>Appl Environ Microbiol</i>. 1994 Jun. 60(6):2023-30.; Silo-Suh LA, Stabb EV, Raffel SJ, Handelsman J. Target range of zwittermicin A, an aminopolyol antibiotic from Bacillus cereus. <i>Curr Microbiol</i>. 1998 Jul. 37(1):6-11.
	Bacillus velezensis (Bacillus amyloliquefaciens subsp. plantarum)	Botrytis cinerea	https://www.researchgate.net/publication/291738678_The_Role_of_Bacillus_Bacterium_in_Formation_of_Plant_Defence_Mechanism_and_Reaction	Igor Maksimov, Ramil Khairullin. The Role of Bacillus Bacterium in Formation of Plant Defence: Mechanism and Reaction. <i>Igor Vladimirovich Maksimov</i>. Jan 26, 2016.
	Bacillus velezensis (Bacillus amyloliquefaciens subsp. plantarum)	colonizes the root surface, increases and grows with new roots.	http://abitep.de/index.php/en/fzb24.html	Website of ABiTEP – Biotech for Agriculture and Ecology
Bradyrhizobium	Bradyrhizobium japonicum	Reduces N2O surrounding the soybean root system via nitrous oxide reductase,has been marketed to enhance plant growth.	http://www.ncbi.nlm.nih.gov/pubmed/?term=16597953	Sameshima-Saito R, Chiba K, Hirayama J, Itakura M, Mitsui H, Eda S, Minamisawa K. Symbiotic Bradyrhizobium japonicum reduces N2O surrounding the soybean root system via nitrous oxide reductase. <i>Appl Environ Microbiol</i>. 2006 Apr. 72(4):2526-32.
	Bradyrhizobium japonicum	t is a culture of nodule-forming,nitrogen-fixing bacteria which gather free air nitrogen and make it available to the plant	http://www.ncbi.nlm.nih.gov/pubmed/?term=19568745; http://www.bioag.novozymes.com/en/products/unitedstates/biofertility/soil-implant/Documents/Soil%20Implant_SB_NA_EL2011.pdf	Berg G. Plant-microbe interactions promoting plant growth and health: perspectives for controlled use of microorganisms in agriculture. <i>Appl Microbiol Biotechnol<i>. 2009 Aug. 84(1):11-8; Soil Implant?+ - Novozymes
	Bradyrhizobium japonicum	Root rot and seed treatments (Fusarium, R. solani, Aspergillus, Pythium and Alternaria)	https://www.researchgate.net/publication/291738678_The_Role_of_Bacillus_Bacterium_in_Formation_of_Plant_Defence_Mechanism_and_Reaction	Igor Maksimov, Ramil Khairullin. The Role of Bacillus Bacterium in Formation of Plant Defence: Mechanism and Reaction. <i>Igor Vladimirovich Maksimov</i>. Jan 26, 2016.
Brevibacillus	Brevibacillus laterosporus (Bacillus laterosporus)	A potential biocontrol agent isolated from a natural hot water spring of Assam, India.	http://www.ncbi.nlm.nih.gov/pubmed/?term=20630733	Saikia R, Gogoi DK, Mazumder S, Yadav A, Sarma RK, Bora TC, Gogoi BK. Brevibacillus laterosporus strain BPM3, a potential biocontrol agent isolated from a natural hot water spring of Assam, India. <i>Microbiol Res</i>. 2011 Mar 20. 166(3):216-25.
	Brevibacillus reuszeri	Increase yield, chlorophyll content, and uptake of macro- and micronutrients by broccoli.	http://hortsci.ashspublications.org/content/46/6/932.full	Yildirim E, Karlidag H, Turan M, Dursun A, Goktepe F. Growth, nutrient uptake, and yield promotion of broccoli by plant growth promoting rhizobacteria with manure. <i>HortScience</i>. 2011 Jun. 46:932-936
	Brevibacillus sp.	Increase yield, chlorophyll content, and uptake of macro- and micronutrients by broccoli.	http://hortsci.ashspublications.org/content/46/6/932.full	Yildirim E, Karlidag H, Turan M, Dursun A, Goktepe F. Growth, nutrient uptake, and yield promotion of broccoli by plant growth promoting rhizobacteria with manure. <i>HortScience</i>. 2011 Jun. 46:932-936
Burkholderia	Burkholderia silvatlantica	Nitrogen-fixing(Corn, sugarcane).	http://www.ncbi.nlm.nih.gov/pubmed/?term=16902033	Perin L, Martínez-Aguilar L, Paredes-Valdez G, Baldani JI, Estrada-de Los Santos P, Reis VM, Caballero-Mellado J. Burkholderia silvatlantica sp. nov., a diazotrophic bacterium associated with sugar cane and maize. <i>Int J Syst Evol Microbiol</i>. 2006 Aug. 56(Pt 8):1931-7.
	Burkholderia sp.	[1] inhibits the growth of Fusarium,a fungal pathogen to maize, which is a biocontrol mechanism,promotes the growth of maize. [2] pyrrolnytrin is produced by it , and has shown activity over Rhizoctonia solani, Botrytis cinerea, Verticillium dahliae,and Sclerotinia sclerotiorum.	http://cat.inist.fr/?aModele=afficheN&cpsidt=20163064; http://www.ncbi.nlm.nih.gov/pubmed/?term=12448749; http://onlinelibrary.wiley.com/doi/10.1002/1526-4998(200008)56:8%3C688::AID-PS186%3E3.0.CO;2-V/abstract	Hernandez-Rodriguez A, Heydrich-Perez M, Acebo-Guerrero Y, Velazquez-del Valle MG,Hernandez-Lauzardo AN. Antagonistic activity of Cuban native rhizobacteria against Fusarium verticillioides(Sacc.) Nirenb. in maize (Zea maysL.). <i>Appl Soil Ecol</i>. 2008. 39:180-186; Raaijmakers JM, Vlami M, de Souza JT. Antibiotic production by bacterial biocontrol agents. <i>Antonie Van Leeuwenhoek</i>. 2002 A…
	Burkholderia sp.	Increase P solubilization from AlPO4(Rice,Melaleuca cajuputi, and Scleria sumatrensis).	https://www.researchgate.net/publication/37571153_Screening_of_phosphate-solubilizing_microorganisms_in_rhizosphere_and_rhizoplane_of_adverse_soil-adapting_plants_in_Southern_Thailand	Pengnoo A, Hashidoko Y, Onthong J, Gimsanguan S, Sae-ong M, Watanabe T, Osaki M, Shinano T. Screening of phosphate- solubilizing microorganisms in rhizosphere and rhizoplane of adverse soil-adapting plants in Southern Thailand. <i>Tropics</i>. 2007 Jan. 16:1-7
	Burkholderia sp.	Increase P efficiency(Maize).	http://www.sciencedirect.com/science/article/pii/S0038071708000679	Oliveira CA, Alves VMC, Marriel IE, Gomes EA, Scotti MR, Carneiro NP, Guimaraes CT, Schaffert RE, Sa' NMH. Phosphate solubilizing microorganisms isolated from rhizosphere of maize cultivated in an oxisol of the Brazilian Cerrado Biome. <i>Soil Biol Biochem</i>. 2009 Sep. 41:1782-1787
	Burkholderia tropica	Nitrogen-fixing(Corn).	http://www.ncbi.nlm.nih.gov/pubmed/?term=15545451	Reis VM, Estrada-de los Santos P, Tenorio-Salgado S, Vogel J, Stoffels M, Guyon S, Mavingui P, Baldani VL, Schmid M, Baldani JI, Balandreau J, Hartmann A, Caballero-Mellado J. Burkholderia tropica sp. nov., a novel nitrogen-fixing, plant-associated bacterium. <i>Int J Syst Evol Microbiol</i>. 2004 Nov. 54(Pt 6):2155-62.
	Burkholderia tropica	Increase P solubilization from AlPO0(Rice,Melaleuca cajuputi, and Scleria sumatrensis).	https://www.researchgate.net/publication/37571153_Screening_of_phosphate-solubilizing_microorganisms_in_rhizosphere_and_rhizoplane_of_adverse_soil-adapting_plants_in_Southern_Thailand	Pengnoo A, Hashidoko Y, Onthong J, Gimsanguan S, Sae-ong M, Watanabe T, Osaki M, Shinano T. Screening of phosphate- solubilizing microorganisms in rhizosphere and rhizoplane of adverse soil-adapting plants in Southern Thailand. <i>Tropics</i>. 2007 Jan. 16:1-7
	Burkholderia unamae	Nitrogen-fixing(Corn, sugarcane).	http://www.ncbi.nlm.nih.gov/pubmed/?term=15280286	Caballero-Mellado J, Martínez-Aguilar L, Paredes-Valdez G, Santos PE. Burkholderia unamae sp. nov., an N2-fixing rhizospheric and endophytic species. <i>Int J Syst Evol Microbiol</i>. 2004 Jul. 54(Pt 4):1165-72.
Delftia	Delftia acidovorans	is an innovative plant growth promoting rhizobacteria (PGPR).	http://www.ncbi.nlm.nih.gov/pubmed/?term=19568745	Berg G. Plant-microbe interactions promoting plant growth and health: perspectives for controlled use of microorganisms in agriculture. <i>Appl Microbiol Biotechnol<i>. 2009 Aug. 84(1):11-8.
	Delftia acidovorans	an innovative plant growth promoting rhizobacteria (PGPR)	http://www.ncbi.nlm.nih.gov/pubmed/?term=21950110	Maksimov IV, Abizgil'dina RR, Pusenkova LI. Plant growth promoting microorganisms as alternative to chemical protection from pathogens (review). <i>Prikl Biokhim Mikrobiol</i>. 2011 Jul-Aug. 47(4):373-85.
Ensifer	Ensifer mexicanus	Form nodules on legumes roots.	http://bidd2.nus.edu.sg/probio/detail.php?id=Probio_P_00142	-
Frankia	Frankia sp.	Is the genus of N2-fixing actinomycetes capable of fixing N2 similar to rhizobial symbiosis. All the host of this type of symbiosis can habitat the marginal land and are implicated in reclamation of saline soil, deserted land. They are the good contributor of nitrogen in forests.	http://bidd2.nus.edu.sg/probio/detail.php?id=Probio_P_00142	-
Methylobacterium	Methylobacterium oryzae	Associated with plants produce plant growth-promoting substances.	https://www.ncbi.nlm.nih.gov/pmc/articles/PMC4161386/	Kwak M J, Jeong H, Madhaiyan M, et al. Genome information of Methylobacterium oryzae, a plant-probiotic methylotroph in the phyllosphere.[J]. <i>Plos One</i>. 2014. 9(9):e106704-e106704.
	Methylobacterium sp.	Siderophore secretion(Citrus sp.).	http://www.ncbi.nlm.nih.gov/pubmed/?term=21046332	Vendan RT, Yu YJ, Lee SH, Rhee YH. Diversity of endophytic bacteria in ginseng and their potential for plant growth promotion. <i>J Microbiol</i>. 2010 Oct. 48(5):559-65.
Microbacterium	Microbacterium sp.	Solubilization of insoluble phosphorus(Rice).	http://www.ncbi.nlm.nih.gov/pubmed/?term=17425114	Islama MT, Deora A, Hashidoko Y, Rahman A, Ito T, Tahara S. Isolation and identification of potential phosphate solubilizing bacteria from the rhizoplane of Oryza sativa L. cv. BR29 of Bangladesh. <i>Z Naturforsch C</i>. 2007 Jan-Feb. 62(1-2):103-10.
	Microbacterium sp.	Solubilize P from tricalcium phosphate (TCP)(Rice).	http://www.iisc.ernet.in/currsci/apr102004/978.pdf	Thakuria D, Talukdar NC, Goswami C, Hazarika S, Boro RC, Khan MR. Characterization and screening of bacteria from rhizosphere of rice grown in acidic soils of Assam. <i>Curr Sci</i>. 2004 Apr. 86:978-985
	Microbacterium sp.	Info will be available soon	http://www.ncbi.nlm.nih.gov/pubmed/?term=22203552	Ruiz D, Agaras B, de Werra P, Wall LG, Valverde C. Characterization and screening of plant probiotic traits of bacteria isolated from rice seeds cultivated in Argentina. <i>J Microbiol</i>. 2011 Dec. 49(6):902-12.
Micrococcus	Micrococcus luteus	IAA synthesis(Ginseng sp.).	http://www.ncbi.nlm.nih.gov/pubmed/?term=21046332	Vendan RT, Yu YJ, Lee SH, Rhee YH. Diversity of endophytic bacteria in ginseng and their potential for plant growth promotion. <i>J Microbiol</i>. 2010 Oct. 48(5):559-65.
Micromonospora	Micromonospora aurantiaca	Increase biomass production and higher aerial growth of plant(Wheat).	http://link.springer.com/article/10.1007/s11274-008-9817-0	Hamdali H, Hafidi M, VirolleMJ, Ouhdouch Y. Rock phosphate-solubilizing Actinomycetes: screening for plant growth-promoting activities. <i>World J Microbiol Biotechnol</i>. 2008 Nov. 24:2565-2575
	Micromonospora aurantiaca	Solubilization of insoluble phosphorus(Wheat).	http://link.springer.com/article/10.1007/s11274-008-9817-0	Hamdali H, Hafidi M, VirolleMJ, Ouhdouch Y. Rock phosphate-solubilizing Actinomycetes: screening for plant growth-promoting activities. <i>World J Microbiol Biotechnol</i>. 2008 Nov. 24:2565-2575
Opitutus	Opitutus terrae	Implications for carbon fluxes in anoxic rice paddy soil to formate Propionate.	http://www.ncbi.nlm.nih.gov/pubmed/?term=11916740; http://www.ncbi.nlm.nih.gov/pubmed/?term=21398538; http://link.springer.com/referenceworkentry/10.1007%2F0-387-30747-8_37	Chin KJ, Janssen PH. Propionate formation by Opitutus terrae in pure culture and in mixed culture with a hydrogenotrophic methanogen and implications for carbon fluxes in anoxic rice paddy soil. <i>Appl Environ Microbiol</i>. 2002 Apr. 68(4):2089-92.; van Passel MW, Kant R, Palva A, Copeland A, Lucas S, Lapidus A, Glavina del Rio T, Pitluck S, Goltsman E, Clum A, Sun H, Schmutz J, Larimer FW, Lan…
Paenibacillus	Paenibacillus polymyxa (Bacillus polymyxa)	Promote plant growth and suppress plant diseases	https://www.ncbi.nlm.nih.gov/pmc/articles/PMC2976442/	Kim J F, Jeong H, Park S Y, et al. Genome Sequence of the Polymyxin-Producing Plant-Probiotic Rhizobacterium Paenibacillus polymyxa E681[J]. <i>Journal of Bacteriology</i>. 2010. 192(22):6103-4.
	Paenibacillus sp.	Info will be available soon	http://www.ncbi.nlm.nih.gov/pubmed/?term=22203552	Ruiz D, Agaras B, de Werra P, Wall LG, Valverde C. Characterization and screening of plant probiotic traits of bacteria isolated from rice seeds cultivated in Argentina. <i>J Microbiol</i>. 2011 Dec. 49(6):902-12.
Pseudomonas	Pseudomonas aeruginosa	Produce both elastase and alkaline proteinase and to be susceptible to gentamicin	https://www.ncbi.nlm.nih.gov/pubmed/7978792	Gray R D, Paterson C A. Application of Peptide-Based Matrix Metalloproteinase Inhibitors in Corneal Ulceration a[J]. <i>Annals of the New York Academy of Sciences</i>. 1994. 732(732):206-16.
	Pseudomonas aeruginosa	Solubilization of insoluble phosphorus(rice).	http://www.iisc.ernet.in/currsci/apr102004/978.pdf	Thakuria D, Talukdar NC, Goswami C, Hazarika S, Boro RC, Khan MR. Characterization and screening of bacteria from rhizosphere of rice grown in acidic soils of Assam. <i>Curr Sci</i>. 2004 Apr. 86:978-985
	Pseudomonas aeruginosa	Increase grain yield(Rice).	http://www.iisc.ernet.in/currsci/apr102004/978.pdf	Thakuria D, Talukdar NC, Goswami C, Hazarika S, Boro RC, Khan MR. Characterization and screening of bacteria from rhizosphere of rice grown in acidic soils of Assam. <i>Curr Sci</i>. 2004 Apr. 86:978-985
	Pseudomonas aeruginosa	Enhance seed germination, shoot and root length, and biomass(Rice and bean).	http://www.ncbi.nlm.nih.gov/pubmed/?term=22558541	Duarah I, Deka M, Saikia N, Deka Boruah HP. Phosphate solubilizers enhance NPK fertilizer use efficiency in rice and legume cultivation. <i>3 Biotech</i>. 2011 Dec. 1(4):227-238.
	Pseudomonas aeruginosa	Solubilization of insoluble phosphorus(Rice and bean).	http://www.ncbi.nlm.nih.gov/pubmed/?term=22558541	Duarah I, Deka M, Saikia N, Deka Boruah HP. Phosphate solubilizers enhance NPK fertilizer use efficiency in rice and legume cultivation. <i>3 Biotech</i>. 2011 Dec. 1(4):227-238.
	Pseudomonas aeruginosa	Enhance seed germination, shoot and root length, and biomass(Rice and bean).	http://www.ncbi.nlm.nih.gov/pubmed/?term=22558541	Duarah I, Deka M, Saikia N, Deka Boruah HP. Phosphate solubilizers enhance NPK fertilizer use efficiency in rice and legume cultivation. <i>3 Biotech</i>. 2011 Dec. 1(4):227-238.
	Pseudomonas aeruginosa	Enhance seed germination, shoot and root length, and biomass(Rice and bean).	http://www.ncbi.nlm.nih.gov/pubmed/?term=22558541	Duarah I, Deka M, Saikia N, Deka Boruah HP. Phosphate solubilizers enhance NPK fertilizer use efficiency in rice and legume cultivation. <i>3 Biotech</i>. 2011 Dec. 1(4):227-238.
	Pseudomonas aeruginosa	Enhance seed germination, shoot and root length, and biomass(Rice and bean).	http://www.ncbi.nlm.nih.gov/pubmed/?term=22558541	Duarah I, Deka M, Saikia N, Deka Boruah HP. Phosphate solubilizers enhance NPK fertilizer use efficiency in rice and legume cultivation. <i>3 Biotech</i>. 2011 Dec. 1(4):227-238.
	Pseudomonas aeruginosa	Solubilization of insoluble phosphorus(Rice and bean).	http://www.ncbi.nlm.nih.gov/pubmed/?term=22558541	Duarah I, Deka M, Saikia N, Deka Boruah HP. Phosphate solubilizers enhance NPK fertilizer use efficiency in rice and legume cultivation. <i>3 Biotech</i>. 2011 Dec. 1(4):227-238.
	Pseudomonas chlororaphis	a biological fungicide	http://www.ncbi.nlm.nih.gov/pubmed/?term=21950110	Maksimov IV, Abizgil'dina RR, Pusenkova LI. Plant growth promoting microorganisms as alternative to chemical protection from pathogens (review). <i>Prikl Biokhim Mikrobiol</i>. 2011 Jul-Aug. 47(4):373-85.
	Pseudomonas chlororaphis	give an equal yield and have a disease controlling efficacy in level with chemical seed treatments in standard seed.	http://www.ncbi.nlm.nih.gov/pubmed/?term=19568745; http://www.rebeca-net.de/downloads/P%20%20chlororaphis%20MA%20342%20.pdf	Berg G. Plant-microbe interactions promoting plant growth and health: perspectives for controlled use of microorganisms in agriculture. <i>Appl Microbiol Biotechnol<i>. 2009 Aug. 84(1):11-8; Pseudomonas chlororaphis MA 342, active organism in the Lantm?nnen BioAgri products Cedomon? and Cerall?. <i>REBECA workshop</i>. 2006 September. Salzau, Germany.
	Pseudomonas chlororaphis subsp. aureofaciens	a biological fungicide	http://www.ncbi.nlm.nih.gov/pubmed/?term=21950110	Maksimov IV, Abizgil'dina RR, Pusenkova LI. Plant growth promoting microorganisms as alternative to chemical protection from pathogens (review). <i>Prikl Biokhim Mikrobiol</i>. 2011 Jul-Aug. 47(4):373-85.
	Pseudomonas chlororaphis subsp. aureofaciens	a biological fungicide	http://www.ncbi.nlm.nih.gov/pubmed/?term=21950110	Maksimov IV, Abizgil'dina RR, Pusenkova LI. Plant growth promoting microorganisms as alternative to chemical protection from pathogens (review). <i>Prikl Biokhim Mikrobiol</i>. 2011 Jul-Aug. 47(4):373-85.
	Pseudomonas chlororaphis subsp. aureofaciens	a biological fungicide	http://www.ncbi.nlm.nih.gov/pubmed/?term=21950110	Maksimov IV, Abizgil'dina RR, Pusenkova LI. Plant growth promoting microorganisms as alternative to chemical protection from pathogens (review). <i>Prikl Biokhim Mikrobiol</i>. 2011 Jul-Aug. 47(4):373-85.
	Pseudomonas chlororaphis subsp. aureofaciens	a biological fungicide	http://www.ncbi.nlm.nih.gov/pubmed/?term=21950110	Maksimov IV, Abizgil'dina RR, Pusenkova LI. Plant growth promoting microorganisms as alternative to chemical protection from pathogens (review). <i>Prikl Biokhim Mikrobiol</i>. 2011 Jul-Aug. 47(4):373-85.
	Pseudomonas chlororaphis subsp. aureofaciens	a biological fungicide	http://www.ncbi.nlm.nih.gov/pubmed/?term=21950110	Maksimov IV, Abizgil'dina RR, Pusenkova LI. Plant growth promoting microorganisms as alternative to chemical protection from pathogens (review). <i>Prikl Biokhim Mikrobiol</i>. 2011 Jul-Aug. 47(4):373-85.
	Pseudomonas chlororaphis subsp. aureofaciens	a biological fungicide	http://www.ncbi.nlm.nih.gov/pubmed/?term=21950110	Maksimov IV, Abizgil'dina RR, Pusenkova LI. Plant growth promoting microorganisms as alternative to chemical protection from pathogens (review). <i>Prikl Biokhim Mikrobiol</i>. 2011 Jul-Aug. 47(4):373-85.
	Pseudomonas corrugata	Showed antagonistic activity against Alternaria alternata and Fusarium oxysporum.	http://www.ncbi.nlm.nih.gov/pubmed/?term=18026795	Trivedi P, Sa T. Pseudomonas corrugata (NRRL B-30409) Mutants Increased Phosphate Solubilization, Organic Acid Production, and Plant Growth at Lower Temperatures. <i>Curr Microbiol</i>. 2008 Feb. 56(2):140-4.
	Pseudomonas corrugata	Inoculation of two important hill crops, Amaranthus paniculatusandEleusine coracanabyP. Corrugata positively influenced plant growth and the nitrogen content of various plant parts.	http://www.sciencedirect.com/science/article/pii/S0944501399800238	Pandey A, Durgapal A, Joshi M, Palni LMS. Influence of Pseudomonas corrugata inoculation on root colonization and growth promotion of two important hill crops. <i>Microbiol Res</i>. 1999 Dec. 154:259-266
	Pseudomonas corrugata	[1] Beneficial properties:P-solubilization; production of IAA, ammonia, siderophore, HCN; biocontrol. [2] Test plant:Maize. [3] Inoculation response:Inoculations resulted in significant increase in grain yield, root–shoot ratio and nutrient content for three consecutive years. Recommended P. corrugata as suitable bioinoculant for maize fields of temperate climate grown under rainfed conditions.	http://www.sciencedirect.com/science/article/pii/S0038071707002921	Kumar B, Trivedi P, Pandey A. Pseudomonas corrugata: a suitable bioinoculant for maize grown under rainfed conditions of Himalayan region. <i>Soil Biol Biochem</i>. 2007 Dec. 39:3093-3100
	Pseudomonas corrugata	Was examined for its tricalcium phosphate (TCP)solubilizing ability along a wide temperature range, from psychrophillic to mesophillic.	http://cat.inist.fr/?aModele=afficheN&cpsidt=15380648	Pandey A, Palni LMS, Mulkalwar P, Nadeem M. Effect of temperature on solubilization of tricalcium phosphate by Pseudomonas corrugata. <i>J Sci Ind Res</i>. 2002. 61:457-460
	Pseudomonas denitrificans	Enhance shoot and root length of wheat and maize; P-uptake of cotton(Wheat, maize,and cotton).	http://www.ag.auburn.edu/auxiliary/nsdl/scasc/Proceedings/2004/Egamberdiyeva.pdf	Egamberdiyeva D, Juraeva D, Poberejskaya S, Myachina O, Teryuhova P, Seydalieva L, Aliev A. Improvement of wheat and cotton growth and nutrient uptake by phosphate solubilizing bacteria. <i>26th Southern Conservation Tillage Conference</i>. 2003
	Pseudomonas fluorescens	Increase shoot and root fresh weight and leaf P content alone or in combination with AMFG. mosseae(tomato rhizosphere).	http://www.ncbi.nlm.nih.gov/pubmed/?term=15197635	Gamalero E, Trotta A, Massa N, Copetta A, Martinotti MG, Berta G. Impact of two fluorescent pseudomonads and an arbuscular mycorrhizal fungus on tomato plant growth, root architecture and P acquisition. <i>Mycorrhiza</i>. 2004 Jul. 14(3):185-92.
	Pseudomonas fluorescens	Pseudomonas fluorescens A506, for the suppression or control of fire blight on pome fruits and the suppression of frost damage on cherry, apple, pear, almond, peach, tomato, potato and strawberry.	http://www.ncbi.nlm.nih.gov/pubmed/?term=19568745; http://www.ncbi.nlm.nih.gov/pubmed/?term=18944382	Berg G. Plant-microbe interactions promoting plant growth and health: perspectives for controlled use of microorganisms in agriculture. <i>Appl Microbiol Biotechnol<i>. 2009 Aug. 84(1):11-8; Stockwell VO, Stack JP. Using Pseudomonas spp. for Integrated Biological Control. <i>Phytopathology</i>. 2007 Feb.97(2):244-9.
	Pseudomonas fluorescens	[1] the growth of V. anguillarum was inhibited by the filter-sterilized supernatans from iron-limited cultures of P. fluorescens AH2 but not from iron-replete cultures. [2] Siderophore production by fluorescent pseudomonads in soil is known to be influenced by a great variety of factors.	http://www.ncbi.nlm.nih.gov/pubmed/?term=10049849; http://www.ncbi.nlm.nih.gov/pubmed/?term=1480114; http://link.springer.com/chapter/10.1007%2F978-1-4684-5409-3_9	Gram L, Melchiorsen J, Spanggaard B, Huber I, Nielsen TF. Inhibition of vibrio anguillarum by Pseudomonas fluorescens AH2, a possible probiotic treatment of fish. <i>Appl Environ Microbiol</i>. 1999 Mar. 65(3):969-73.; O'Sullivan DJ, O'Gara F. Traits of fluorescent Pseudomonas spp. involved in suppression of plant root pathogens. <i>Microbiol Rev</i>. 1992 Dec. 56(4):662-76. Review.; Bossier P., …
	Pseudomonas fluorescens	decreased the number of pathogenic agents such as Alternaria sp. and Fusarium sp.	http://www.ncbi.nlm.nih.gov/pubmed/?term=21950110	Maksimov IV, Abizgil'dina RR, Pusenkova LI. Plant growth promoting microorganisms as alternative to chemical protection from pathogens (review). <i>Prikl Biokhim Mikrobiol</i>. 2011 Jul-Aug. 47(4):373-85.
	Pseudomonas fluorescens	Was isolated from a soil in the Morens region of Switzerland that is suppressive to black root rot of tobacco, caused byThielaviopsis basicola.	https://www.apsnet.org/publications/phytopathology/backissues/Documents/1986Articles/Phyto76n02_181.pdf	Stutz, E., G. De'fago, and H. Kern. Naturally occurring fluorescent pseudomonads involved in suppression of black root rot of tobacco. <i>Phytopathology</i>. 1986. 76:181-185
	Pseudomonas fluorescens	Inhibited mycelial growth of a damping-off phytopathogen Aphanomyces cochlioides AC-5 through inducing excessive branching and curling in the hyphae.	http://www.ncbi.nlm.nih.gov/pubmed/?term=24026919	Islam MT, Fukushi Y. Growth inhibition and excessive branching in Aphanomyces cochlioides induced by 2,4-diacetylphloroglucinol is linked to disruption of filamentous actin cytoskeleton in the hyphae. <i>World J Microbiol Biotechnol</i>. 2010 Jul. 26(7):1163-70.
	Pseudomonas fluorescens	Capable of inhibiting the growth of Aeromonas salmonicida in culture media and that this inhibition is due to competition for free iron.	https://www.cabdirect.org/cabdirect/abstract/19942202150	Smith P., Davey S. Evidence for the competitive exclusion of Aeromonas salmonicida from fish with stress-inducible furunculosis by a fluorescent pseudomonad. <i>J. Fish Dis.</i>. 1993. 16:521-524
	Pseudomonas fluorescens	Increase shoot and root fresh weight and leaf P content alone(Tomato).	http://www.ncbi.nlm.nih.gov/pubmed/?term=15197635	Gamalero E, Trotta A, Massa N, Copetta A, Martinotti MG, Berta G. Impact of two fluorescent pseudomonads and an arbuscular mycorrhizal fungus on tomato plant growth, root architecture and P acquisition. <i>Mycorrhiza</i>. 2004 Jul. 14(3):185-92.
	Pseudomonas fluorescens	The commercial product contains grinded mycorrhizal roots, spores and mycelia of arbuscular mycorrhizal fungi (AMF) Glomus mosseae GP11, G. viscosum GC41, G. intraradices GB67, as well as plant-growth-promoting-rhizobacteria (PGPR) like Pseudomonas sp. PN 01, P. fluorescens PA28, Bacillus subtilis BA41, Streptomyces sp. SB14, and the antagonistic saprophytic fungus Trichoderma viride TH03. For pr…	http://orgprints.org/10307/1/bosco-etal-2007-commercial_plant-probiotic.pdf	M. Bosco, G. Giovannetti, C. Picard, E. Baruffa, A. Brondolo, F. Sabbioni. Commercial plant-probiotic microorganisms for sustainable organic tomato production systems. <i>3rd QLIF Congress<i>. 2007 March. Hohenheim, Germany.
	Pseudomonas fluorescens	[1] Beneficial properties:P-solubilization, production of siderophore; Biocontrol. [2] Test plant:Pea. [3] Inoculation response:Increase in germination (%), seedling length, root and shoot length, fresh and dry weight, vigour index and mortality.	http://www.iisc.ernet.in/currsci/dec252005/2151.pdf	Negi YK, Garg SK, Kumar J. Cold tolerant fluorescent Pseudomonas isolates from Garhwal Himalayas as potential plant growth promoting and biocontrol agents in pea. <i>Curr Sci</i>. 2005 Dec. 89:2151-2156
	Pseudomonas fluorescens	[1] Beneficial properties:P-solubilization, production of siderophore; Biocontrol. [2] Test plant:Pea. [3] Inoculation response:Increase in germination (%), seedling length, root and shoot length, fresh and dry weight, vigour index and mortality.	http://www.iisc.ernet.in/currsci/dec252005/2151.pdf	Negi YK, Garg SK, Kumar J. Cold tolerant fluorescent Pseudomonas isolates from Garhwal Himalayas as potential plant growth promoting and biocontrol agents in pea. <i>Curr Sci</i>. 2005 Dec. 89:2151-2156
	Pseudomonas fluorescens	[1] Beneficial properties:P-solubilization, production of siderophore; Biocontrol. [2] Test plant:Pea. [3] Inoculation response:Increase in germination (%), seedling length, root and shoot length, fresh and dry weight, vigour index and mortality.	http://www.iisc.ernet.in/currsci/dec252005/2151.pdf	Negi YK, Garg SK, Kumar J. Cold tolerant fluorescent Pseudomonas isolates from Garhwal Himalayas as potential plant growth promoting and biocontrol agents in pea. <i>Curr Sci</i>. 2005 Dec. 89:2151-2156
	Pseudomonas fluorescens	[1] Beneficial properties:P-solubilization, production of siderophore; Biocontrol. [2] Test plant:Pea. [3] Inoculation response:Increase in germination (%), seedling length, root and shoot length, fresh and dry weight, vigour index and mortality.	http://www.iisc.ernet.in/currsci/dec252005/2151.pdf	Negi YK, Garg SK, Kumar J. Cold tolerant fluorescent Pseudomonas isolates from Garhwal Himalayas as potential plant growth promoting and biocontrol agents in pea. <i>Curr Sci</i>. 2005 Dec. 89:2151-2156
	Pseudomonas fluorescens	Suppresses take-all when applied as a seed treatment.	http://www.ncbi.nlm.nih.gov/pubmed/?term=8593055; http://www.ncbi.nlm.nih.gov/pubmed/?term=1660695; https://www.apsnet.org/publications/phytopathology/backissues/Documents/1994Articles/Phyto84n09_940.pdf	Keel C, Weller DM, Natsch A, Défago G, Cook RJ, Thomashow LS. Conservation of the 2,4-diacetylphloroglucinol biosynthesis locus among fluorescent Pseudomonas strains from diverse geographic locations. <i>Appl Environ Microbiol</i>. 1996 Feb. 62(2):552-63.; Vincent MN, Harrison LA, Brackin JM, Kovacevich PA, Mukerji P, Weller DM, Pierson EA. Genetic analysis of the antifungal activity of a soilbor…
	Pseudomonas fluorescens	[1] Decreased Azospirillum, fluorescent Pseudomonas, and total bacterial population. [2] Total saprophytic fungi increased. [3] Increase or decrease in Esterase and Trehalose activity. [4] Increased Phosphatase and Chitinase activity(Zea mays).	http://link.springer.com/article/10.1007/s003740050024	Vazquez P, Holguin G, Puente ME, Lopez-Cortes A, Bashan Y. Phosphate-solubilizing microorganisms associated with the rhizosphere of mangroves in a semiarid coastal lagoon. <i>Biol Fertil Soils</i>. 2000 Mar. 30:460-468
	Pseudomonas fluorescens	Uptake of hydrocarbons	http://link.springer.com/article/10.1007/s10847-006-9231-x	Bardi L, Martini C, Opsi F, et al. Cyclodextrin-enhanced in situ bioremediation of polyaromatic hydrocarbons-contaminated soils and plant uptake[J]. <i>Journal of Inclusion Phenomena & Macrocyclic Chemistry</i>. 2007. 57(1-4):439-444.
	Pseudomonas fluorescens	Required for colonization of potato roots.	https://www.ncbi.nlm.nih.gov/pubmed/?term=Flagella+of+a+plant-growth-stimulating+Pseudomonas+fluorescens+strain+are+required+for+colonization+of+potato+roots.	Weger L A D, Vlugt C I V D, Wijfjes A H, et al. Flagella of a plant-growth-stimulating Pseudomonas fluorescens strain are required for colonization of potato roots.[J]. <i>Journal of Bacteriology</i>. 1987. 169(6):2769-73.
	Pseudomonas lurida	Has been reported to positively influence the growth and nutrient uptake of wheat in pot culture conditions growing in controlled cold temperatures.	http://link.springer.com/article/10.1007/s11274-010-0559-4	Selvakumar G, Joshi P, Suyal P, Mishra PK, Joshi GK, Bisht JK, Bhatt JC, Gupta HS. Pseudomonas lurida M2RH3 (MTCC 9245), a psychrotolerant bacterium from the Uttarakhand Himalayas, solubilizes phosphate and promotes wheat seedling growth. <i>World J Microbiol Biotechnol</i>. 2011 May. 27(5):1129-1135
	Pseudomonas monteilii	Stimulated ectomycorrhizal and endomycorrhizal colonization of Acacia root systems(Acacia sp.), Ectomycorrhizas provide many benefits to their host plants, with enhanced nutrient uptake, growth and establishment in disturbed habitats ranked highly among them.	http://www.ncbi.nlm.nih.gov/pubmed/?term=12682830	Duponnois R, Plenchette C. A mycorrhiza helper bacterium enhances ectomycorrhizal and endomycorrhizal symbiosis of Australian Acacia species. <i>Mycorrhiza</i>. 2003 Apr. 13(2):85-91.
	Pseudomonas poae	The P-solubilizing bacterial treatments with it resulted in significantly higher or statistically at par growth and the total N, P, and K content over single super phosphate treatment in maize.	http://www.ncbi.nlm.nih.gov/pubmed/?term=21193830	Vyas P, Joshi R, Sharma KC, Rahi P, Gulati A, Gulati A. Cold-adapted and rhizosphere-competent strain of Rahnella sp. with broad-spectrum plant growth-promotion potential. <i>J Microbiol Biotechnol</i>. 2010 Dec. 20(12):1724-34.
	Pseudomonas poae	Solubilization of insoluble phosphorus(Maize).	http://www.ncbi.nlm.nih.gov/pubmed/?term=19698133	Vyas P, Gulati A. Organic acid production in vitro and plant growth promotion in maize under controlled environment by phosphate-solubilizing fluorescent Pseudomonas. <i>BMC Microbiol</i>. 2009 Aug 22. 9:174.
	Pseudomonas putida	[2] In tomato, resistance is induced via phytoalexins and the LOX pathway after treatment with Pseudomonas putida.	http://link.springer.com/article/10.1007/s11274-010-0559-4; http://bmcplantbiol.biomedcentral.com/articles/10.1186/1471-2229-8-113	Selvakumar G, Joshi P, Suyal P, Mishra PK, Joshi GK, Bisht JK, Bhatt JC, Gupta HS. Pseudomonas lurida M2RH3 (MTCC 9245), a psychrotolerant bacterium from the Uttarakhand Himalayas, solubilizes phosphate and promotes wheat seedling growth. <i>World J Microbiol Biotechnol</i>. 2011 May. 27(5):1129-1135. Akram A, Ongena M, Duby F, Sommes J, Thonart P. Systemic resistance and lipoxygenaserelated defe…
	Pseudomonas putida	Increase yield and nutrient uptake(Rice).	http://link.springer.com/article/10.1007%2FBF02182344	Kundu BS, Gaur AC. Rice response to inoculation with N2-fixing and P-solubilizing microorganisms. <i>Plant Soil</i>. 1984 Jun. 79:227-234
	Pseudomonas putida	Increase biological and grain yield(Barley).	http://www.idosi.org/aejaes/jaes3(6)/5.pdf	Mehrvarz S, Chaichi MR, Alikhani HA. Effect of Phosphate solubilizing microorganisms and phosphorus chemical fertilizer on yield and yield components of barley (Hordeum vulgare L). <i>American Eurasian J Agric Environ Sci</i>. 2008. 3: 822-828
	Pseudomonas putida	Increase biological and grain yield(Barley).	http://www.idosi.org/aejaes/jaes3(6)/5.pdf	Mehrvarz S, Chaichi MR, Alikhani HA. Effect of Phosphate solubilizing microorganisms and phosphorus chemical fertilizer on yield and yield components of barley (Hordeum vulgare L). <i>American Eurasian J Agric Environ Sci</i>. 2008. 3: 822-828
	Pseudomonas putida	The plant growth promotion and antifungal properties were demonstrated through a maize-based bioassay under greenhouse conditions.	http://www.ncbi.nlm.nih.gov/pubmed/?term=11472906; http://www.ncbi.nlm.nih.gov/pubmed/?term=16832725	Glandorf DC, Verheggen P, Jansen T, Jorritsma JW, Smit E, Leeflang P, Wernars K, Thomashow LS, Laureijs E, Thomas-Oates JE, Bakker PA, van Loon LC. Effect of genetically modified Pseudomonas putida WCS358r on the fungal rhizosphere microflora of field-grown wheat. <i>Appl Environ Microbiol</i>. 2001 Aug. 67(8):3371-8.; Pandey A, Trivedi P, Kumar B, Palni LM. Characterization of a phosphate solubi…
	Pseudomonas putida	Info will be available soon	http://www.ncbi.nlm.nih.gov/pubmed/?term=15886913	Tripathi M, Munot HP, Shouche Y, Meyer JM, Goel R. Isolation and functional characterization of siderophore-producing lead- and cadmium-resistant Pseudomonas putida KNP9. <i>Curr Microbiol</i>. 2005 May. 50(5):233-7.
	Pseudomonas rathonis	Enhance shoot and root length of wheat and maize; P-uptake of cotton(Wheat, maize,and cotton).	http://www.ag.auburn.edu/auxiliary/nsdl/scasc/Proceedings/2004/Egamberdiyeva.pdf	Egamberdiyeva D, Juraeva D, Poberejskaya S, Myachina O, Teryuhova P, Seydalieva L, Aliev A. Improvement of wheat and cotton growth and nutrient uptake by phosphate solubilizing bacteria. <i>26th Southern Conservation Tillage Conference</i>. 2003
	Pseudomonas sp.	Show high versatility in their metabolic capacity. Antibiotics, siderophores and volatiles such as hydrogen cyanide are among the metabolites generally released by Pseudomonads.	http://www.ncbi.nlm.nih.gov/pubmed/?term=16329908	Charest MH, Beauchamp CJ, Antoun H. Effects of the humic substances of de-inking paper sludge on the antagonism between two compost bacteria and Pythium ultimum. <i>FEMS Microbiol Ecol</i>. 2005 Apr 1. 52(2):219-27.
	Pseudomonas sp.	Positively influenced the growth and nutrient uptake parameters of wheat seedlings in glasshouse studies at suboptimal cold conditions.	http://link.springer.com/article/10.1007/s11274-007-9558-5	Selvakumar G, Kundu S, Joshi P, Nazim S, Gupta AD, Mishra PK, Gupta HS. Characterization of a cold-tolerant plant growth-promoting bacterium Pantoea dispersa 1A isolated from a sub-alpine soil in the North Western Indian Himalayas. <i>World J Microbiol Biotechnol</i>. 2008 Jul. 24:955-960
	Pseudomonas sp.	Increase root and shoot weight,plant height, spike length, grain yield, seed P content, leaf protein, and leaf sugar content(Wheat).	http://agris.fao.org/agris-search/search.do?recordID=PK2008000890	Afzal A, Bano A. Rhizobium and phosphate solubilizing bacteria improve the yield and phosphorus uptake in wheat (Triticum aestivum). <i>Int J Agri Biol</i>. 2008. 10:85-88
	Pseudomonas sp.	Info will be available soon	http://www.ncbi.nlm.nih.gov/pubmed/?term=10805572	Kim KK, Kang JG, Moon SS, Kang KY. Isolation and identification of antifungal N-butylbenzenesulphonamide produced by Pseudomonas sp. AB2. <i>J Antibiot</i> (Tokyo). 2000 Feb. 53(2):131-6.
	Pseudomonas sp.	Increase plant growth (shoot and root) and NPK contents in plant tissues(Maize).	http://www.ncbi.nlm.nih.gov/pubmed/?term=21193830	Vyas P, Joshi R, Sharma KC, Rahi P, Gulati A, Gulati A. Cold-adapted and rhizosphere-competent strain of Rahnella sp. with broad-spectrum plant growth-promotion potential. <i>J Microbiol Biotechnol</i>. 2010 Dec. 20(12):1724-34.
	Pseudomonas sp.	The P-solubilizing bacterial treatments with it resulted in significantly higher or statistically at par growth and the total N, P, and K content over single super phosphate treatment in maize.	http://www.ncbi.nlm.nih.gov/pubmed/?term=21193830	Vyas P, Joshi R, Sharma KC, Rahi P, Gulati A, Gulati A. Cold-adapted and rhizosphere-competent strain of Rahnella sp. with broad-spectrum plant growth-promotion potential. <i>J Microbiol Biotechnol</i>. 2010 Dec. 20(12):1724-34.
	Pseudomonas sp.	Solubilization of insoluble phosphorus(Maize).	http://www.ncbi.nlm.nih.gov/pubmed/?term=19698133	Vyas P, Gulati A. Organic acid production in vitro and plant growth promotion in maize under controlled environment by phosphate-solubilizing fluorescent Pseudomonas. <i>BMC Microbiol</i>. 2009 Aug 22. 9:174.
	Pseudomonas sp.	Increase plant biomass and grain yield(Maize).	http://link.springer.com/article/10.1007/s11274-008-9817-0	Hamdali H, Hafidi M, VirolleMJ, Ouhdouch Y. Rock phosphate-solubilizing Actinomycetes: screening for plant growth-promoting activities. <i>World J Microbiol Biotechnol</i>. 2008 Nov. 24:2565-2575
	Pseudomonas sp.	improve nutrient acquistion, healthy growth of tomato plants and suppress Fusarium crown and root rot disease caused by Fusarium oxysporum Schlecht f.sp radicis-lycopersici Jarvis and Shoemarker.	http://www.ncbi.nlm.nih.gov/pubmed/?term=19568745; http://escholarship.org/uc/item/8g70p0zt; http://www.ncbi.nlm.nih.gov/pubmed/?term=20644925	Berg G. Plant-microbe interactions promoting plant growth and health: perspectives for controlled use of microorganisms in agriculture. <i>Appl Microbiol Biotechnol<i>. 2009 Aug. 84(1):11-8; Yusran, Yusran et al. Effects of Pseudomonas sp. ”Proradix” and Bacillus amyloliquefaciens FZB42 on the Establishment of AMF Infection, Nutrient Acquisition and Growth of Tomato Affected by Fusarium oxysporum…
	Pseudomonas sp.	Was as effective as the fungicides Thiram and Previcur N in suppressing preemergence damping off of sugar beet caused byPythium ultimum.	http://www.ncbi.nlm.nih.gov/pubmed/?term=1476431	Fenton AM, Stephens PM, Crowley J, O'Callaghan M, O'Gara F. Exploitation of gene(s) involved in 2,4-diacetylphloroglucinol biosynthesis to confer a new biocontrol capability to a Pseudomonas strain. <i>Appl Environ Microbiol</i>. 1992 Dec. 58(12):3873-8.
	Pseudomonas sp.	[1] Beneficial properties:P-solubilization; Production of siderophore, rhamnolipid, ACC deaminase, HCN, IAA; Biocontrol. [2] Test plant:Chili and Tomato. [3] Inoculation response:Significant increase in shoot and root length in two different seasons. The bacterial treatments significantly increased the activity of peroxidase and phenylalanine ammonia lyase in plant tissues. The suppression effica…	http://www.ncbi.nlm.nih.gov/pubmed/?term=17593351	Sharma A, Pathak A, Sahgal M, Meyer JM, Wray V, Johri BN. Molecular characterization of plant growth promoting rhizobacteria that enhance peroxidase and phenylalanine ammonia-lyase activities in chile (Capsicum annuum L.) and tomato (Lycopersicon esculentum Mill.). <i>Arch Microbiol</i>. 2007 Nov. 188(5):483-94.
	Pseudomonas sp.	[1] Beneficial properties:P-solubilization; Production of siderophore, rhamnolipid, ACC deaminase, HCN, IAA; Biocontrol. [2] Test plant:Chili and Tomato. [3] Inoculation response:Significant increase in shoot and root length in two different seasons. The bacterial treatments significantly increased the activity of peroxidase and phenylalanine ammonia lyase in plant tissues. The suppression effica…	http://www.ncbi.nlm.nih.gov/pubmed/?term=17593351	Sharma A, Pathak A, Sahgal M, Meyer JM, Wray V, Johri BN. Molecular characterization of plant growth promoting rhizobacteria that enhance peroxidase and phenylalanine ammonia-lyase activities in chile (Capsicum annuum L.) and tomato (Lycopersicon esculentum Mill.). <i>Arch Microbiol</i>. 2007 Nov. 188(5):483-94.
	Pseudomonas sp.	[1] Beneficial properties:Biocontrol. [2] Test plant:Soybean. [3] Inoculation response:Severity of foliar anthracnose was significantly reduced in disease susceptible variety ps1042. Compared to nonbacterized control, dry root weight was improved.	http://www.ncbi.nlm.nih.gov/pubmed/?term=16604418	Tripathi M, Johri BN, Sharma A. Plant growth-promoting Pseudomonas sp. Strains reduce natural occurrence of anthracnose in soybean (Glycine max L.) in central Himalayan region. <i>Curr Microbiol</i>. 2006 May. 52(5):390-4.
	Pseudomonas sp.	[1] Beneficial properties:P-solubilization; Production of siderophore, rhamnolipid, ACC deaminase, HCN, IAA; Biocontrol. [2] Test plant:Chili and Tomato. [3] Inoculation response:Significant increase in shoot and root length in two different seasons. The bacterial treatments significantly increased the activity of peroxidase and phenylalanine ammonia lyase in plant tissues. The suppression effica…	http://www.ncbi.nlm.nih.gov/pubmed/?term=17593351	Sharma A, Pathak A, Sahgal M, Meyer JM, Wray V, Johri BN. Molecular characterization of plant growth promoting rhizobacteria that enhance peroxidase and phenylalanine ammonia-lyase activities in chile (Capsicum annuum L.) and tomato (Lycopersicon esculentum Mill.). <i>Arch Microbiol</i>. 2007 Nov. 188(5):483-94.
	Pseudomonas sp.	[1] Beneficial properties:Biocontrol. [2] Test plant:Soybean. [3] Inoculation response:Severity of foliar anthracnose was significantly reduced in disease susceptible variety ps1042. Compared to nonbacterized control, dry root weight was improved.	http://www.ncbi.nlm.nih.gov/pubmed/?term=16604418	Tripathi M, Johri BN, Sharma A. Plant growth-promoting Pseudomonas sp. Strains reduce natural occurrence of anthracnose in soybean (Glycine max L.) in central Himalayan region. <i>Curr Microbiol</i>. 2006 May. 52(5):390-4.
	Pseudomonas sp.	The commercial product contains grinded mycorrhizal roots, spores and mycelia of arbuscular mycorrhizal fungi (AMF) Glomus mosseae GP11, G. viscosum GC41, G. intraradices GB67, as well as plant-growth-promoting-rhizobacteria (PGPR) like Pseudomonas sp. PN 01, P. fluorescens PA28, Bacillus subtilis BA41, Streptomyces sp. SB14, and the antagonistic saprophytic fungus Trichoderma viride TH03. For pr…	http://orgprints.org/10307/1/bosco-etal-2007-commercial_plant-probiotic.pdf	M. Bosco, G. Giovannetti, C. Picard, E. Baruffa, A. Brondolo, F. Sabbioni. Commercial plant-probiotic microorganisms for sustainable organic tomato production systems. <i>3rd QLIF Congress<i>. 2007 March. Hohenheim, Germany.
	Pseudomonas sp.	Promote plant growth	https://www.ncbi.nlm.nih.gov/pubmed/?term=Aerobic+and+Anaerobic+Catabolism+of+Vanillic+Acid+and+Some+Other+Methoxy-Aromatic+Compounds+by+Pseudomonas+sp.+Strain+PN-1	Taylor B F. Aerobic and Anaerobic Catabolism of Vanillic Acid and Some Other Methoxy-Aromatic Compounds by Pseudomonas sp. Strain PN-1[J]. <i>Applied & Environmental Microbiology</i>. 1983. 46(6):1286-92.
	Pseudomonas sp.	[1] Beneficial properties:Biocontrol. [2] Test plant:Soybean. [3] Inoculation response:Severity of foliar anthracnose was significantly reduced in disease susceptible variety ps1042. Compared to nonbacterized control, dry root weight was improved.	http://www.ncbi.nlm.nih.gov/pubmed/?term=16604418	Tripathi M, Johri BN, Sharma A. Plant growth-promoting Pseudomonas sp. Strains reduce natural occurrence of anthracnose in soybean (Glycine max L.) in central Himalayan region. <i>Curr Microbiol</i>. 2006 May. 52(5):390-4.
	Pseudomonas sp.	Enhance shoot and root length of wheat and maize; P-uptake of cotton(Wheat, maize,and cotton).	http://www.ag.auburn.edu/auxiliary/nsdl/scasc/Proceedings/2004/Egamberdiyeva.pdf	Egamberdiyeva D, Juraeva D, Poberejskaya S, Myachina O, Teryuhova P, Seydalieva L, Aliev A. Improvement of wheat and cotton growth and nutrient uptake by phosphate solubilizing bacteria. <i>26th Southern Conservation Tillage Conference</i>. 2003
	Pseudomonas sp.	Solubilization of insoluble phosphorus(Rice and bean).	http://www.ncbi.nlm.nih.gov/pubmed/?term=22558541	Duarah I, Deka M, Saikia N, Deka Boruah HP. Phosphate solubilizers enhance NPK fertilizer use efficiency in rice and legume cultivation. <i>3 Biotech</i>. 2011 Dec. 1(4):227-238.
	Pseudomonas sp.	discovered growth promotion in plants and their antagonism against Meloidogyne incognita after treatment.	http://www.ncbi.nlm.nih.gov/pubmed/?term=21950110	Maksimov IV, Abizgil'dina RR, Pusenkova LI. Plant growth promoting microorganisms as alternative to chemical protection from pathogens (review). <i>Prikl Biokhim Mikrobiol</i>. 2011 Jul-Aug. 47(4):373-85.
	Pseudomonas sp.	[1] Beneficial properties:Biocontrol. [2] Test plant:Soybean. [3] Inoculation response:Severity of foliar anthracnose was significantly reduced in disease susceptible variety ps1042. Compared to nonbacterized control, dry root weight was improved.	http://www.ncbi.nlm.nih.gov/pubmed/?term=16604418	Tripathi M, Johri BN, Sharma A. Plant growth-promoting Pseudomonas sp. Strains reduce natural occurrence of anthracnose in soybean (Glycine max L.) in central Himalayan region. <i>Curr Microbiol</i>. 2006 May. 52(5):390-4.
	Pseudomonas stutzeri	Responded well as bioinoculant on Zea maysunder NaCl stress and are good phosphate solubilizer too.This is proved best alternative to vegetate saline fields by producing growthpromoting substance and will help the plant in the uptake of phosphate meant for better growth of plants and allow a better exploitation of natural soil resources.	http://link.springer.com/article/10.1007/s11104-010-0372-8	Naz I, Bano A. Biochemical, molecular characterization and growth promoting effects of phosphate solubilizingPseudomonassp. isolated from weeds grown in salt range of Pakistan. 2010 Sep. 334:199-207
	Pseudomonas syringae	to prevent postharvest fungal diseases during storage of citrus, pome, stone fruits, and potatoes.	http://www.ncbi.nlm.nih.gov/pubmed/?term=18944382	Stockwell VO, Stack JP. Using Pseudomonas spp. for Integrated Biological Control. <i>Phytopathology</i>. 2007 Feb.97(2):244-9.
	Pseudomonas syringae	to prevent postharvest fungal diseases during storage of citrus, pome, stone fruits, and potatoes.	http://www.ncbi.nlm.nih.gov/pubmed/?term=18944382	Stockwell VO, Stack JP. Using Pseudomonas spp. for Integrated Biological Control. <i>Phytopathology</i>. 2007 Feb.97(2):244-9.
	Pseudomonas trivialis	feed on the root exudates and produce substances themselves such as iron-chelate. This increases soil fertility and the microbial activity of the soil.	http://www.ncbi.nlm.nih.gov/pubmed/?term=19568745	Berg G. Plant-microbe interactions promoting plant growth and health: perspectives for controlled use of microorganisms in agriculture. <i>Appl Microbiol Biotechnol<i>. 2009 Aug. 84(1):11-8.
	Pseudomonas trivialis	The P-solubilizing bacterial treatments with it resulted in significantly higher or statistically at par growth and the total N, P, and K content over single super phosphate treatment in maize.	http://www.ncbi.nlm.nih.gov/pubmed/?term=19698133	Vyas P, Gulati A. Organic acid production in vitro and plant growth promotion in maize under controlled environment by phosphate-solubilizing fluorescent Pseudomonas. <i>BMC Microbiol</i>. 2009 Aug 22. 9:174.
	Pseudomonas trivialis	Solubilization of insoluble phosphorus(Maize).	http://www.ncbi.nlm.nih.gov/pubmed/?term=19698133	Vyas P, Gulati A. Organic acid production in vitro and plant growth promotion in maize under controlled environment by phosphate-solubilizing fluorescent Pseudomonas. <i>BMC Microbiol</i>. 2009 Aug 22. 9:174.
	Pseudomonas trivialis	Isolated from the Indian trans-Himalayas reported for high phosphate solubilization, stress tolerance, organic acid production, and plant growthpromotion was employed for present studies.	http://www.ncbi.nlm.nih.gov/pubmed/?term=19319589	Vyas P, Rahi P, Gulati A. Stress tolerance and genetic variability of phosphate-solubilizing fluorescent Pseudomonas from the cold deserts of the trans-Himalayas. <i>Microb Ecol</i>. 2009 Aug. 58(2):425-34.
	Pseudomonas trivialis	The P-solubilizing bacterial treatments with it resulted in significantly higher or statistically at par growth and the total N, P, and K content over single super phosphate treatment in maize.	http://www.ncbi.nlm.nih.gov/pubmed/?term=21193830	Vyas P, Joshi R, Sharma KC, Rahi P, Gulati A, Gulati A. Cold-adapted and rhizosphere-competent strain of Rahnella sp. with broad-spectrum plant growth-promotion potential. <i>J Microbiol Biotechnol</i>. 2010 Dec. 20(12):1724-34.
Rhizobium	Rhizobium leguminosarum	Promotes lettuce,carrots and strawberry growth	http://link.springer.com/article/10.1007/s13199-015-0373-8	Flores-Félix J D, Marcos-García M, Silva L R, et al. Rhizobium as plant probiotic for strawberry production under microcosm conditions[J]. <i>Symbiosis</i>. 2016. 1-8.
	Rhizobium leguminosarum bv. phaseoli	Increase dry matter of maize and lettuce(Maize and lettuce).	http://link.springer.com/article/10.1007/s00374-005-0034-9	Canbolat MY, Bilen S, Cakmakci R, Sahin F, Aydin A. Effect of plant growth-promoting bacteria and soil compaction on barley seedling growth, nutrient uptake, soil properties and rhizosphere microflora. <i>Biol Fertil Soils</i>. 2006 Mar. 42:350-357
	Rhizobium leguminosarum bv. phaseoli	Increase dry matter of maize and lettuce(Maize and lettuce).	http://link.springer.com/article/10.1007/s00374-005-0034-9	Canbolat MY, Bilen S, Cakmakci R, Sahin F, Aydin A. Effect of plant growth-promoting bacteria and soil compaction on barley seedling growth, nutrient uptake, soil properties and rhizosphere microflora. <i>Biol Fertil Soils</i>. 2006 Mar. 42:350-357
	Rhizobium lusitanum	Form nodules on legumes roots.	https://www.ncbi.nlm.nih.gov/pubmed/17082403/	Valverde A , Igual J M , Peix A , et al. Rhizobium lusitanum sp. nov. a bacterium that nodulates Phaseolus vulgaris[J]. INTERNATIONAL JOURNAL OF SYSTEMATIC AND EVOLUTIONARY MICROBIOLOGY, 2006, 56(11):2631-2637.
	Rhizobium miluonense	Form nodules on legumes roots.	https://www.ncbi.nlm.nih.gov/pubmed/18523179	Gu C T , Wang E T , Tian C F , et al. Rhizobium miluonense sp. nov. a symbiotic bacterium isolated from Lespedeza root nodules[J]. INTERNATIONAL JOURNAL OF SYSTEMATIC AND EVOLUTIONARY MICROBIOLOGY, 2008, 58(6):1364-1368.
	Rhizobium multihospitium	Form nodules on legumes roots.	https://www.ncbi.nlm.nih.gov/pubmed/18599718	Han T X , Wang E T , Wu L J , et al. Rhizobium multihospitium sp. nov. isolated from multiple legume species native of Xinjiang, China[J]. International Journal of Systematic and Evolutionary Microbiology, 2008, 58(Pt 7):1693-1699.
	Rhizobium sphaerophysae	Form nodules on legumes roots.	https://www.ncbi.nlm.nih.gov/pubmed/21308410	Xu L , Shi J F , Zhao P , et al. Rhizobium sphaerophysaesp. nov. a novel species isolated from root nodules ofSphaerophysa salsulain China[J]. Antonie Van Leeuwenhoek, 2011, 99(4):845-854.
Sphingomonas	Sphingomonas azotifigens	Nitrogen-fixing(Rice).	http://www.ncbi.nlm.nih.gov/pubmed/?term=16585711	Xie CH, Yokota A. Sphingomonas azotifigens sp. nov., a nitrogen-fixing bacterium isolated from the roots of Oryza sativa. <i>Int J Syst Evol Microbiol</i>. 2006 Apr. 56(Pt 4):889-93.
	Sphingomonas sp.	Have been reported to synthesize auxins at levels comparable to those detected in this study.	http://www.ncbi.nlm.nih.gov/pubmed/?term=22203552	Ruiz D, Agaras B, de Werra P, Wall LG, Valverde C. Characterization and screening of plant probiotic traits of bacteria isolated from rice seeds cultivated in Argentina. <i>J Microbiol</i>. 2011 Dec. 49(6):902-12.
Sporolactobacillus	Sporolactobacillus inulinus	Presents probiotic features of great potential in the vegetative cell form.	http://www.ncbi.nlm.nih.gov/pubmed/?term=17387552	Huang HY, Huang SY, Chen PY, King VA, Lin YP, Tsen JH. Basic characteristics of Sporolactobacillus inulinus BCRC 14647 for potential probiotic properties. <i>Curr Microbiol</i>. 2007 May. 54(5):396-404.
	Sporolactobacillus laevolacticus	Enhance shoot and root length of wheat and maize; P-uptake of cotton(Wheat, maize,and cotton).	http://www.ag.auburn.edu/auxiliary/nsdl/scasc/Proceedings/2004/Egamberdiyeva.pdf	Egamberdiyeva D, Juraeva D, Poberejskaya S, Myachina O, Teryuhova P, Seydalieva L, Aliev A. Improvement of wheat and cotton growth and nutrient uptake by phosphate solubilizing bacteria. <i>26th Southern Conservation Tillage Conference</i>. 2003
Staphylococcus	Staphylococcus epidermidis	Enhance seed germination, shoot and root length, and biomass(Rice and bean).	http://www.ncbi.nlm.nih.gov/pubmed/?term=22558541	Duarah I, Deka M, Saikia N, Deka Boruah HP. Phosphate solubilizers enhance NPK fertilizer use efficiency in rice and legume cultivation. <i>3 Biotech</i>. 2011 Dec. 1(4):227-238.
	Staphylococcus epidermidis	Solubilization of insoluble phosphorus(Rice and bean).	http://www.ncbi.nlm.nih.gov/pubmed/?term=22558541	Duarah I, Deka M, Saikia N, Deka Boruah HP. Phosphate solubilizers enhance NPK fertilizer use efficiency in rice and legume cultivation. <i>3 Biotech</i>. 2011 Dec. 1(4):227-238.
	Staphylococcus sp.	Solubilization of insoluble phosphorus(Wheat).	http://link.springer.com/article/10.1007/s11274-008-9817-0	Hamdali H, Hafidi M, VirolleMJ, Ouhdouch Y. Rock phosphate-solubilizing Actinomycetes: screening for plant growth-promoting activities. <i>World J Microbiol Biotechnol</i>. 2008 Nov. 24:2565-2575
	Staphylococcus sp.	Solubilization of insoluble phosphorus(rice).	http://www.iisc.ernet.in/currsci/apr102004/978.pdf	Thakuria D, Talukdar NC, Goswami C, Hazarika S, Boro RC, Khan MR. Characterization and screening of bacteria from rhizosphere of rice grown in acidic soils of Assam. <i>Curr Sci</i>. 2004 Apr. 86:978-985
	Staphylococcus sp.	Solubilization of insoluble phosphorus(Wheat).	http://link.springer.com/article/10.1007/s11274-008-9817-0	Hamdali H, Hafidi M, VirolleMJ, Ouhdouch Y. Rock phosphate-solubilizing Actinomycetes: screening for plant growth-promoting activities. <i>World J Microbiol Biotechnol</i>. 2008 Nov. 24:2565-2575
Stenotrophomonas	Stenotrophomonas sp.	Nitrogen fixation(Ginseng sp.).	http://www.ncbi.nlm.nih.gov/pubmed/?term=21046332	Vendan RT, Yu YJ, Lee SH, Rhee YH. Diversity of endophytic bacteria in ginseng and their potential for plant growth promotion. <i>J Microbiol</i>. 2010 Oct. 48(5):559-65.
	Stenotrophomonas sp.	Info will be available soon	http://www.ncbi.nlm.nih.gov/pubmed/?term=10508056	Nakayama T, Homma Y, Hashidoko Y, Mizutani J, Tahara S. Possible role of xanthobaccins produced by Stenotrophomonas sp. strain SB-K88 in suppression of sugar beet damping-off disease. <i>Appl Environ Microbiol</i>. 1999 Oct. 65(10):4334-9.
Streptomyces	Streptomyces anthocyanicus	Increase grain yield(Rice).	http://www.iisc.ernet.in/currsci/apr102004/978.pdf	Thakuria D, Talukdar NC, Goswami C, Hazarika S, Boro RC, Khan MR. Characterization and screening of bacteria from rhizosphere of rice grown in acidic soils of Assam. <i>Curr Sci</i>. 2004 Apr. 86:978-985
	Streptomyces cavourensis	Increase biomass production and higher aerial growth of plant(Wheat).	http://link.springer.com/article/10.1007/s11274-008-9817-0	Hamdali H, Hafidi M, VirolleMJ, Ouhdouch Y. Rock phosphate-solubilizing Actinomycetes: screening for plant growth-promoting activities. <i>World J Microbiol Biotechnol</i>. 2008 Nov. 24:2565-2575
	Streptomyces griseoviridis	protect against soil pathogens such as Pythium, Fusarium and Phomopsis.	http://www.ncbi.nlm.nih.gov/pubmed/?term=19568745	Berg G. Plant-microbe interactions promoting plant growth and health: perspectives for controlled use of microorganisms in agriculture. <i>Appl Microbiol Biotechnol<i>. 2009 Aug. 84(1):11-8.
	Streptomyces griseus	prevent root and sprout diseases.	http://www.ncbi.nlm.nih.gov/pubmed/?term=21950110	Maksimov IV, Abizgil'dina RR, Pusenkova LI. Plant growth promoting microorganisms as alternative to chemical protection from pathogens (review). <i>Prikl Biokhim Mikrobiol</i>. 2011 Jul-Aug. 47(4):373-85.
	Streptomyces griseus	Increase biomass production and higher aerial growth of plant(Wheat).	http://link.springer.com/article/10.1007/s11274-008-9817-0	Hamdali H, Hafidi M, VirolleMJ, Ouhdouch Y. Rock phosphate-solubilizing Actinomycetes: screening for plant growth-promoting activities. <i>World J Microbiol Biotechnol</i>. 2008 Nov. 24:2565-2575
	Streptomyces griseus	Increase biomass production and higher aerial growth of plant(Wheat).	http://link.springer.com/article/10.1007/s11274-008-9817-0	Hamdali H, Hafidi M, VirolleMJ, Ouhdouch Y. Rock phosphate-solubilizing Actinomycetes: screening for plant growth-promoting activities. <i>World J Microbiol Biotechnol</i>. 2008 Nov. 24:2565-2575
	Streptomyces lavengulata	prevent root and sprout diseases.	http://www.ncbi.nlm.nih.gov/pubmed/?term=21950110	Maksimov IV, Abizgil'dina RR, Pusenkova LI. Plant growth promoting microorganisms as alternative to chemical protection from pathogens (review). <i>Prikl Biokhim Mikrobiol</i>. 2011 Jul-Aug. 47(4):373-85.
	Streptomyces sp.	Antibiotic(Grevillea pteridifolia).	http://www.ncbi.nlm.nih.gov/pubmed/?term=21350663	Pimentel MR, Molina G, Dionísio AP, Maróstica Junior MR, Pastore GM. The use of endophytes to obtain bioactive compounds and their application in biotransformation process. <i>Biotechnol Res Int</i>. 2011. 2011:576286.
	Streptomyces sp.	Produces antifungal protein (SAP) and is specific for Pythium porphyrae , a causative agent of red rot disease in Porphyra spp.	http://www.ncbi.nlm.nih.gov/pubmed/?term=12039718	Woo JH, Kitamura E, Myouga H, Kamei Y. An antifungal protein from the marine bacterium streptomyces sp. Strain AP77 is specific for Pythium porphyrae, a causative agent of red rot disease in Porphyra spp. <i>Appl Environ Microbiol</i>. 2002 Jun. 68(6):2666-75.
	Streptomyces sp.	Promote plant growth(Maize).	http://nbaindia.org/uploaded/docs/bulletin5-soilmicrobial.pdf; http://www.ncbi.nlm.nih.gov/pubmed/?term=16832725	Pandey A, Trivedi P, Kumar B, Chaurasia B, Palni LMS. Soil microbial diversity from the Himalaya: need for documentation and conservation. NBA Scientific Bulletin No. 5, National Biodivesity Authority Chennai, Tamil Nadu, India. 2006; Pandey A, Trivedi P, Kumar B, Palni LMS. Characteristics of a phosphate solubilizing and antagonistic strain of Pseudomonas putida (B0) isolated from a sub-alpine l…
	Streptomyces sp.	Increase plant growth (shoot and root) and NPK contents in plant tissues(Maize).	http://www.ncbi.nlm.nih.gov/pubmed/?term=19698133	Vyas P, Gulati A. Organic acid production in vitro and plant growth promotion in maize under controlled environment by phosphate-solubilizing fluorescent Pseudomonas. <i>BMC Microbiol</i>. 2009 Aug 22. 9:174.
	Streptomyces sp.	Increase plant growth (shoot and root) and NPK contents in plant tissues(Maize).	http://www.ncbi.nlm.nih.gov/pubmed/?term=21193830	Vyas P, Joshi R, Sharma KC, Rahi P, Gulati A, Gulati A. Cold-adapted and rhizosphere-competent strain of Rahnella sp. with broad-spectrum plant growth-promotion potential. <i>J Microbiol Biotechnol</i>. 2010 Dec. 20(12):1724-34.
	Streptomyces sp.	The commercial product contains grinded mycorrhizal roots, spores and mycelia of arbuscular mycorrhizal fungi (AMF) Glomus mosseae GP11, G. viscosum GC41, G. intraradices GB67, as well as plant-growth-promoting-rhizobacteria (PGPR) like Pseudomonas sp. PN 01, P. fluorescens PA28, Bacillus subtilis BA41, Streptomyces sp. SB14, and the antagonistic saprophytic fungus Trichoderma viride TH03. For pr…	http://orgprints.org/10307/1/bosco-etal-2007-commercial_plant-probiotic.pdf	M. Bosco, G. Giovannetti, C. Picard, E. Baruffa, A. Brondolo, F. Sabbioni. Commercial plant-probiotic microorganisms for sustainable organic tomato production systems. <i>3rd QLIF Congress<i>. 2007 March. Hohenheim, Germany.
	Streptomyces sp.	Reduce inputs on the second growing season without reducing tomato fruit yield and quality	https://www.researchgate.net/publication/28684242_Plant-probiotic_microorganisms_for_a_sustainable_buffer_of_input_reduction_in_organic_and_low-input_tomato_production_systems	Baruffa E, Picard C, Sabbioni F, et al. Plant-probiotic microorganisms for a sustainable buffer of input reduction in organic and low-input tomato production systems.[C]// Cultivating the future based on science. Volume 1: Organic Crop Production. Proceedings of the Second Scientific Conference of the International Society of Organic Agriculture Research (ISOFAR), held at the 16th IFOAM Organic W…
	Streptomyces sp.	Reduce the further adoption of other disease management strategies in the field during the cultivation.	http://link.springer.com/chapter/10.1007/978-94-017-9389-6_9	Gullino M L, Gilardi G, Garibaldi A. Chemical and Non Chemical Seed Dressing for Leafy Vegetable Crops. <i>Global Perspectives on the Health of Seeds and Plant Propagation Material</i>. 2014. 125-136.
	Streptomyces xiamenensis	Was isolated from the national mangrove reserve in Fujian Province, China. It synthesised compounds such as menaquinones, MK-9(H4) and MK-9(H6) and fatty acids.	http://www.ncbi.nlm.nih.gov/pubmed/?term=19244424	Xu J, Wang Y, Xie SJ, Xu J, Xiao J, Ruan JS. Streptomyces xiamenensis sp. nov., isolated from mangrove sediment. <i>Int J Syst Evol Microbiol</i>. 2009 Mar. 59(Pt 3):472-6.

## Sheet: Table S6
Table S6. The document information of pathogenic fungi in the plant.
Taxonomy		Effect	Reference	Reference linkages
genus	species
Antrodia	Antrodia albidoides	Most species are found in temperate and boreal forests, and cause brown rot.Most species grow on the wood of coniferous trees, except for A. albida, which grows on the dead wood of deciduous trees.	Ellis JB, Ellis MB (1990). Fungi without Gills (Hymenomycetes and Gasteromycetes): An Identification Handbook. London, UK: Chapman and Hall. p. 27. ISBN 0-412-36970-2.
Ceratocystis	Ceratocystis albifundus	Several species are important plant pathogens, causing diseases such as oak wilt and pineapple black rot.	Barnes I , Nakabonge G , Roux J , et al. Comparison of populations of the wilt pathogen Ceratocystis albifundus, in South Africa and Uganda[J]. Plant Pathology, 2010, 54(2):189-195.	https://www.researchgate.net/publication/227729578_Comparisons_of_the_wilt_pathogen_Ceratocystis_albifundus_in_South_Africa_and_Uganda
Cladosporium	Cladosporium cladosporioides	it is an important agent of plant disease, attacking both the leaves and fruits of many plants.
	Cladosporium allicinum	Many species of Cladosporium are commonly found on living and dead plant material. Some species are plant pathogens, others parasitize other fungi.	Bensch K, Braun U, Groenewald JZ, Crous PW.(2012).The genus Cladosporium.Stud Mycol. 15;72(1):1-401. doi: 10.3114/sim0003.
Diaporthe	Diaporthe helianthi	a genus of endophytic, saprobic and plant pathogenic fungi.Diaporthe helianthi is the causal agent of sunflower stem canker, a serious pathogen of sunflower in Europe.	R.R. Gomes, C. Glienke, S.I.R. Videira, L. Lombard,J.Z. Groenewald, and P.W. Crous. (2013).Diaporthe: a genus of endophytic, saprobic and plant pathogenic fungi.Persoonia. 31: 1–41.doi: 10.3767/003158513X666844;Pecchia S , Mercatelli E , Vannacci G . Intraspecific Diversity withinDiaporthe Helianthi: Evidence from Rdna Intergenic Spacer (IGS) Sequence Analysis[J]. Mycopathologia, 2004, 157(3):317…	https://www.ncbi.nlm.nih.gov/pmc/articles/PMC3904044/;https://www.ncbi.nlm.nih.gov/pubmed/15180160/
Epicoccum	Epicoccum nigrum	A plant pathogen and endophyte, it is a widespread fungus which produces coloured pigments that can be used as antifungal agents against other pathogenic fungi. saprophytic fungus, forming on dead and dying plants.	Anderson, K.H. Domsch, W. Gams, Traute-Heidi (1981). Compendium of soil fungi. London: Academic Press. ISBN 0-12-220401-8.
Khuskia	Khuskia oryzae	K. oryzae is common on maize (Zea mays), and mainly affects the stalks, husks and ears.		http://www.plantwise.org/KnowledgeBank/Datasheet.aspx?dsid=29380
Lasiodiplodia	Lasiodiplodia theobromae	The plant pathogenic fungus, Lasiodiplodia theobromae	Tsukada K , Takahashi K , Nabeta K . Biosynthesis of jasmonic acid in a plant pathogenic fungus, Lasiodiplodia theobromae[J]. Phytochemistry, 2010, 71(17-18):2019-2023.	https://www.ncbi.nlm.nih.gov/pubmed/20952041
Pezicula	Pezicula.sp	Species in Neofabraea, Pezicula, and related genera have been reported as saprobes, plant pathogens or endophytes from a wide range of hosts.	Chen C, Verkley GJ, Sun G, Groenewald JZ, Crous PW. Redefining common endophytes and plant pathogens in Neofabraea, Pezicula, and related genera.
Pseudopithomyces	Pseudopithomyces chartarum	is a new pathogen of wheat in Argentina that can cause diseases on different cultivars as well as produce mycotoxins.	Analía PerellóMónica AulicinoSebastián A. (2017).Pseudopithomyces chartarum associated with wheat seeds in Argentina, pathogenicity and evaluation of toxigenic ability. 148,(2), pp 491–496.DOI: 10.1007/s10658-016-1093-5	https://link.springer.com/article/10.1007%2Fs10658-016-1093-5
Crustoderma	Crustoderma corneum	Crustoderma corneum is associated with a brown-rot decay of Pinus species.	K. K. NAKASONE.(1984).TAXONOMY OF CRUSTODERMA (APHYLLOPHORALES, CORTICIACEAE) .Mycologia, 76(1),40-50.	https://www.fpl.fs.fed.us/documnts/pdf1984/nakas84b.pdf
Microidium	Microidium phyllanthi	Microidium phyllanthi causing powdery mildew on chamber bitter in Vietnam	Tam LTT, Hoai HT, Thao LP, Huong NT, Khue NM, 2015. First report of Microidium phyllanthi causing powdery mildew on chamber bitter in Vietnam. New Disease Reports 32, 32.
Ustilago	Ustilago esculenta	This species is pathogenic as well		https://en.wikipedia.org/wiki/Ustilago_esculenta
